# Supplementary material
Source: MDPI journal article supplement (https://www.mdpi.com/2076-3417/13/16/9319)

Scene 1: Bed empty

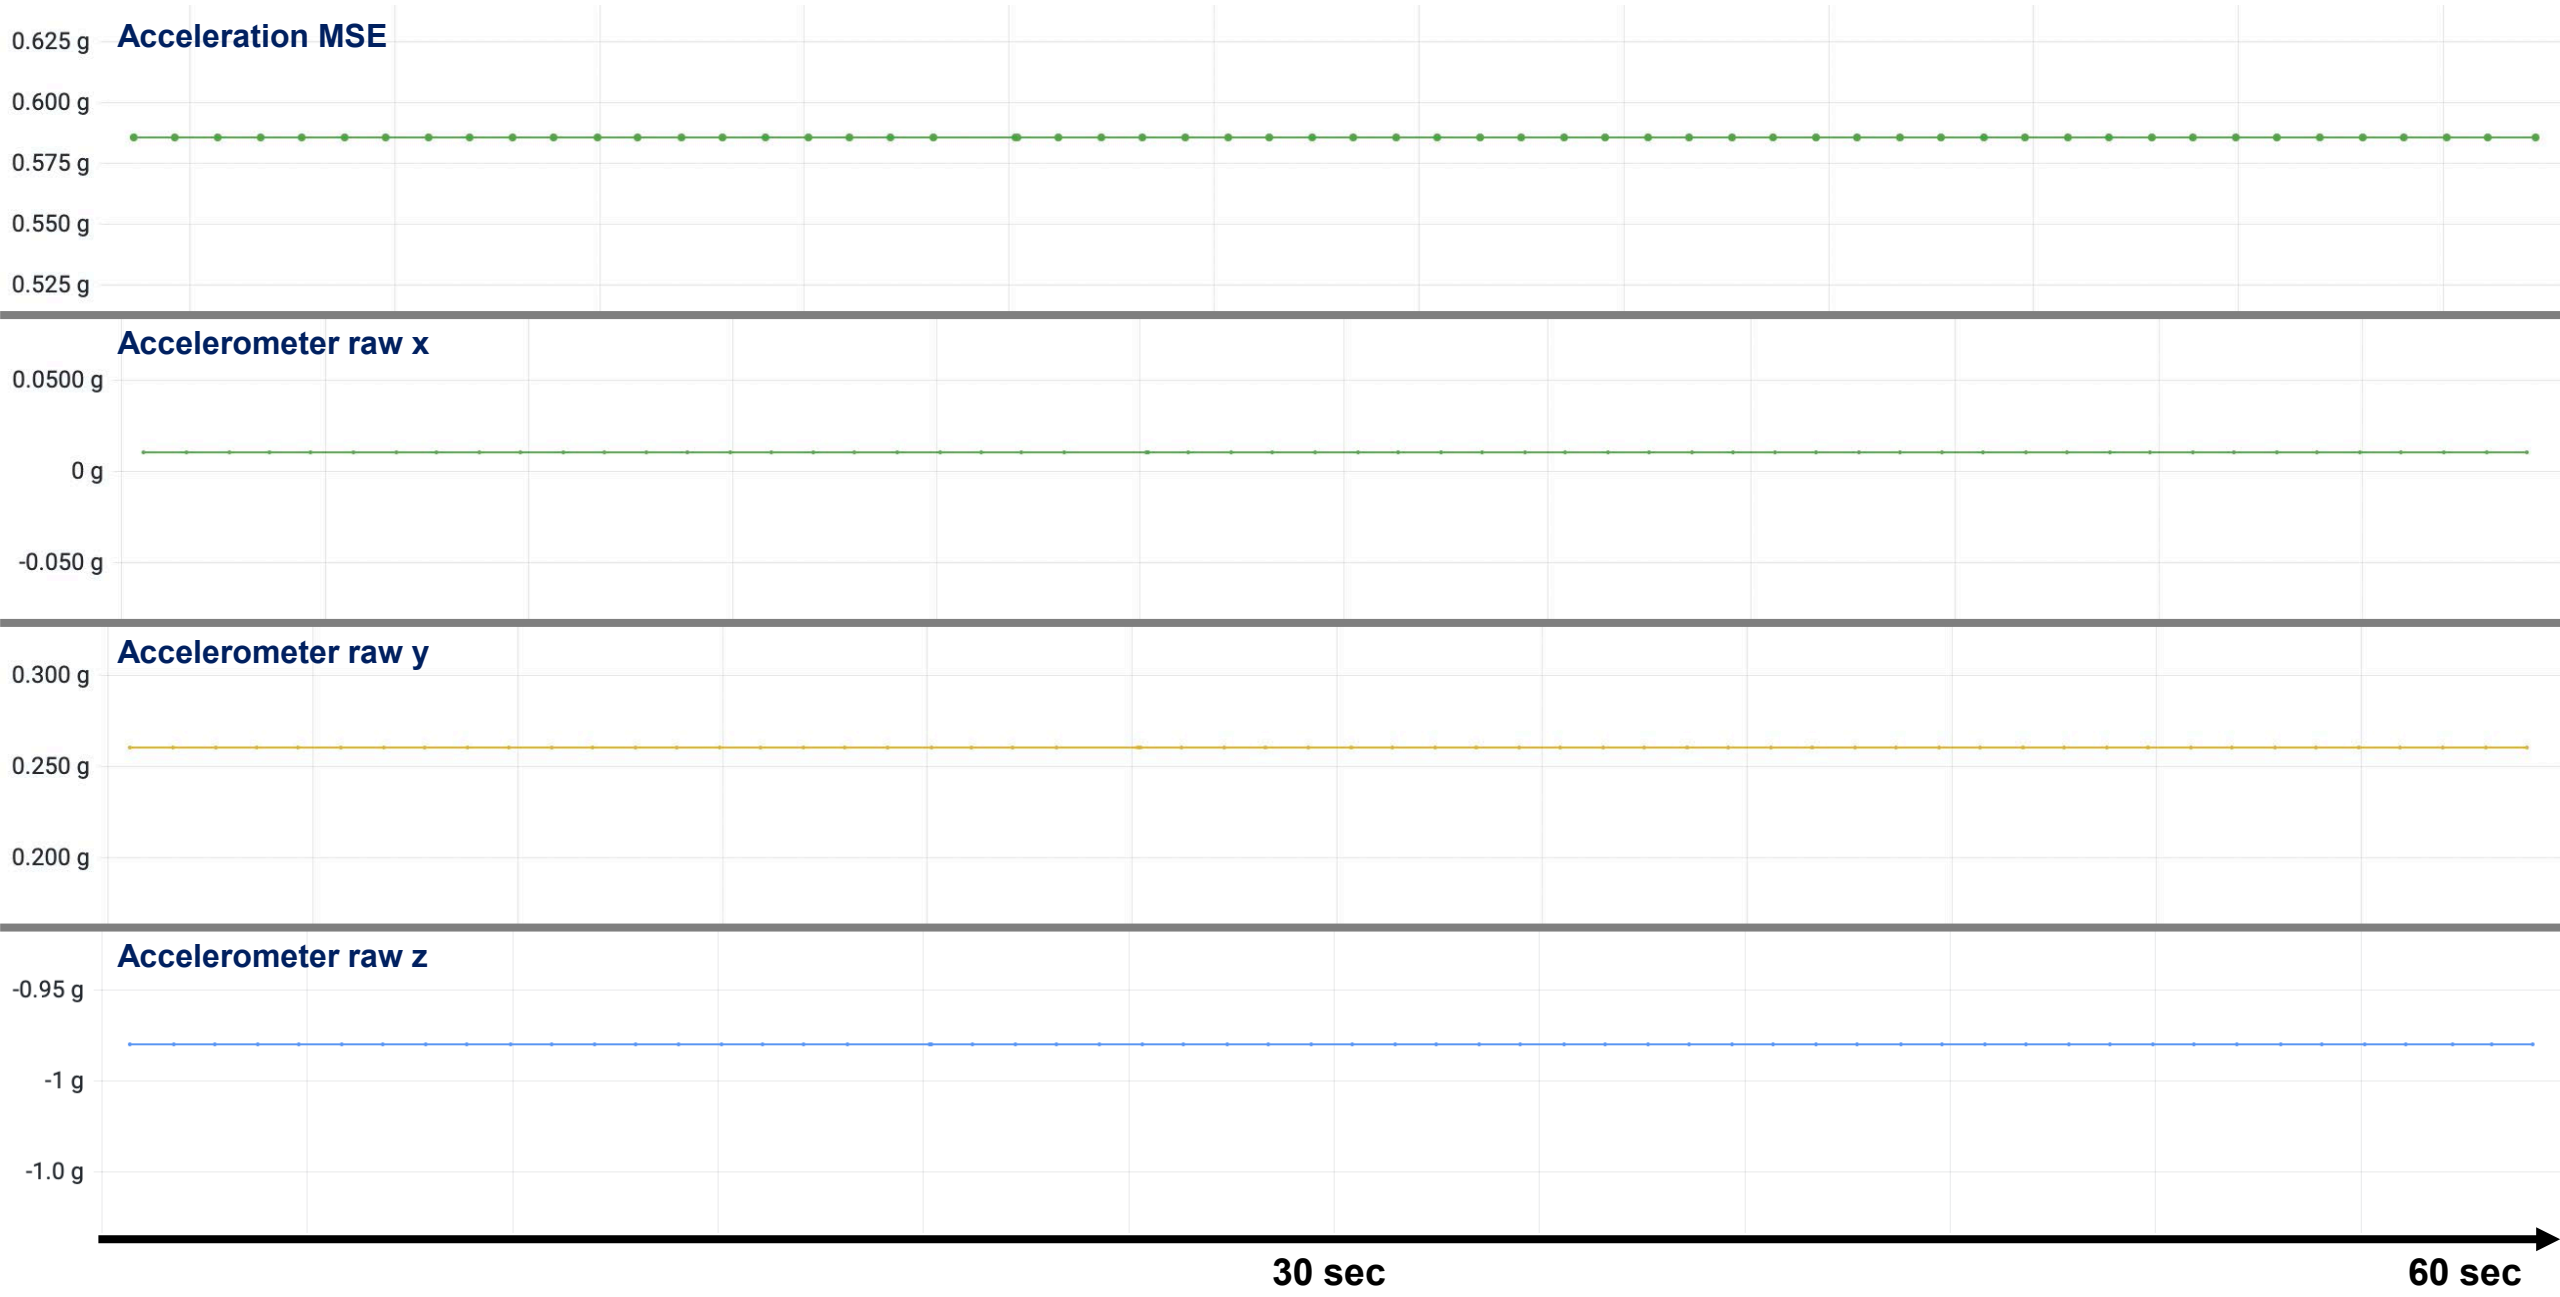

Scene 1: Bed empty (suboptimal recording)

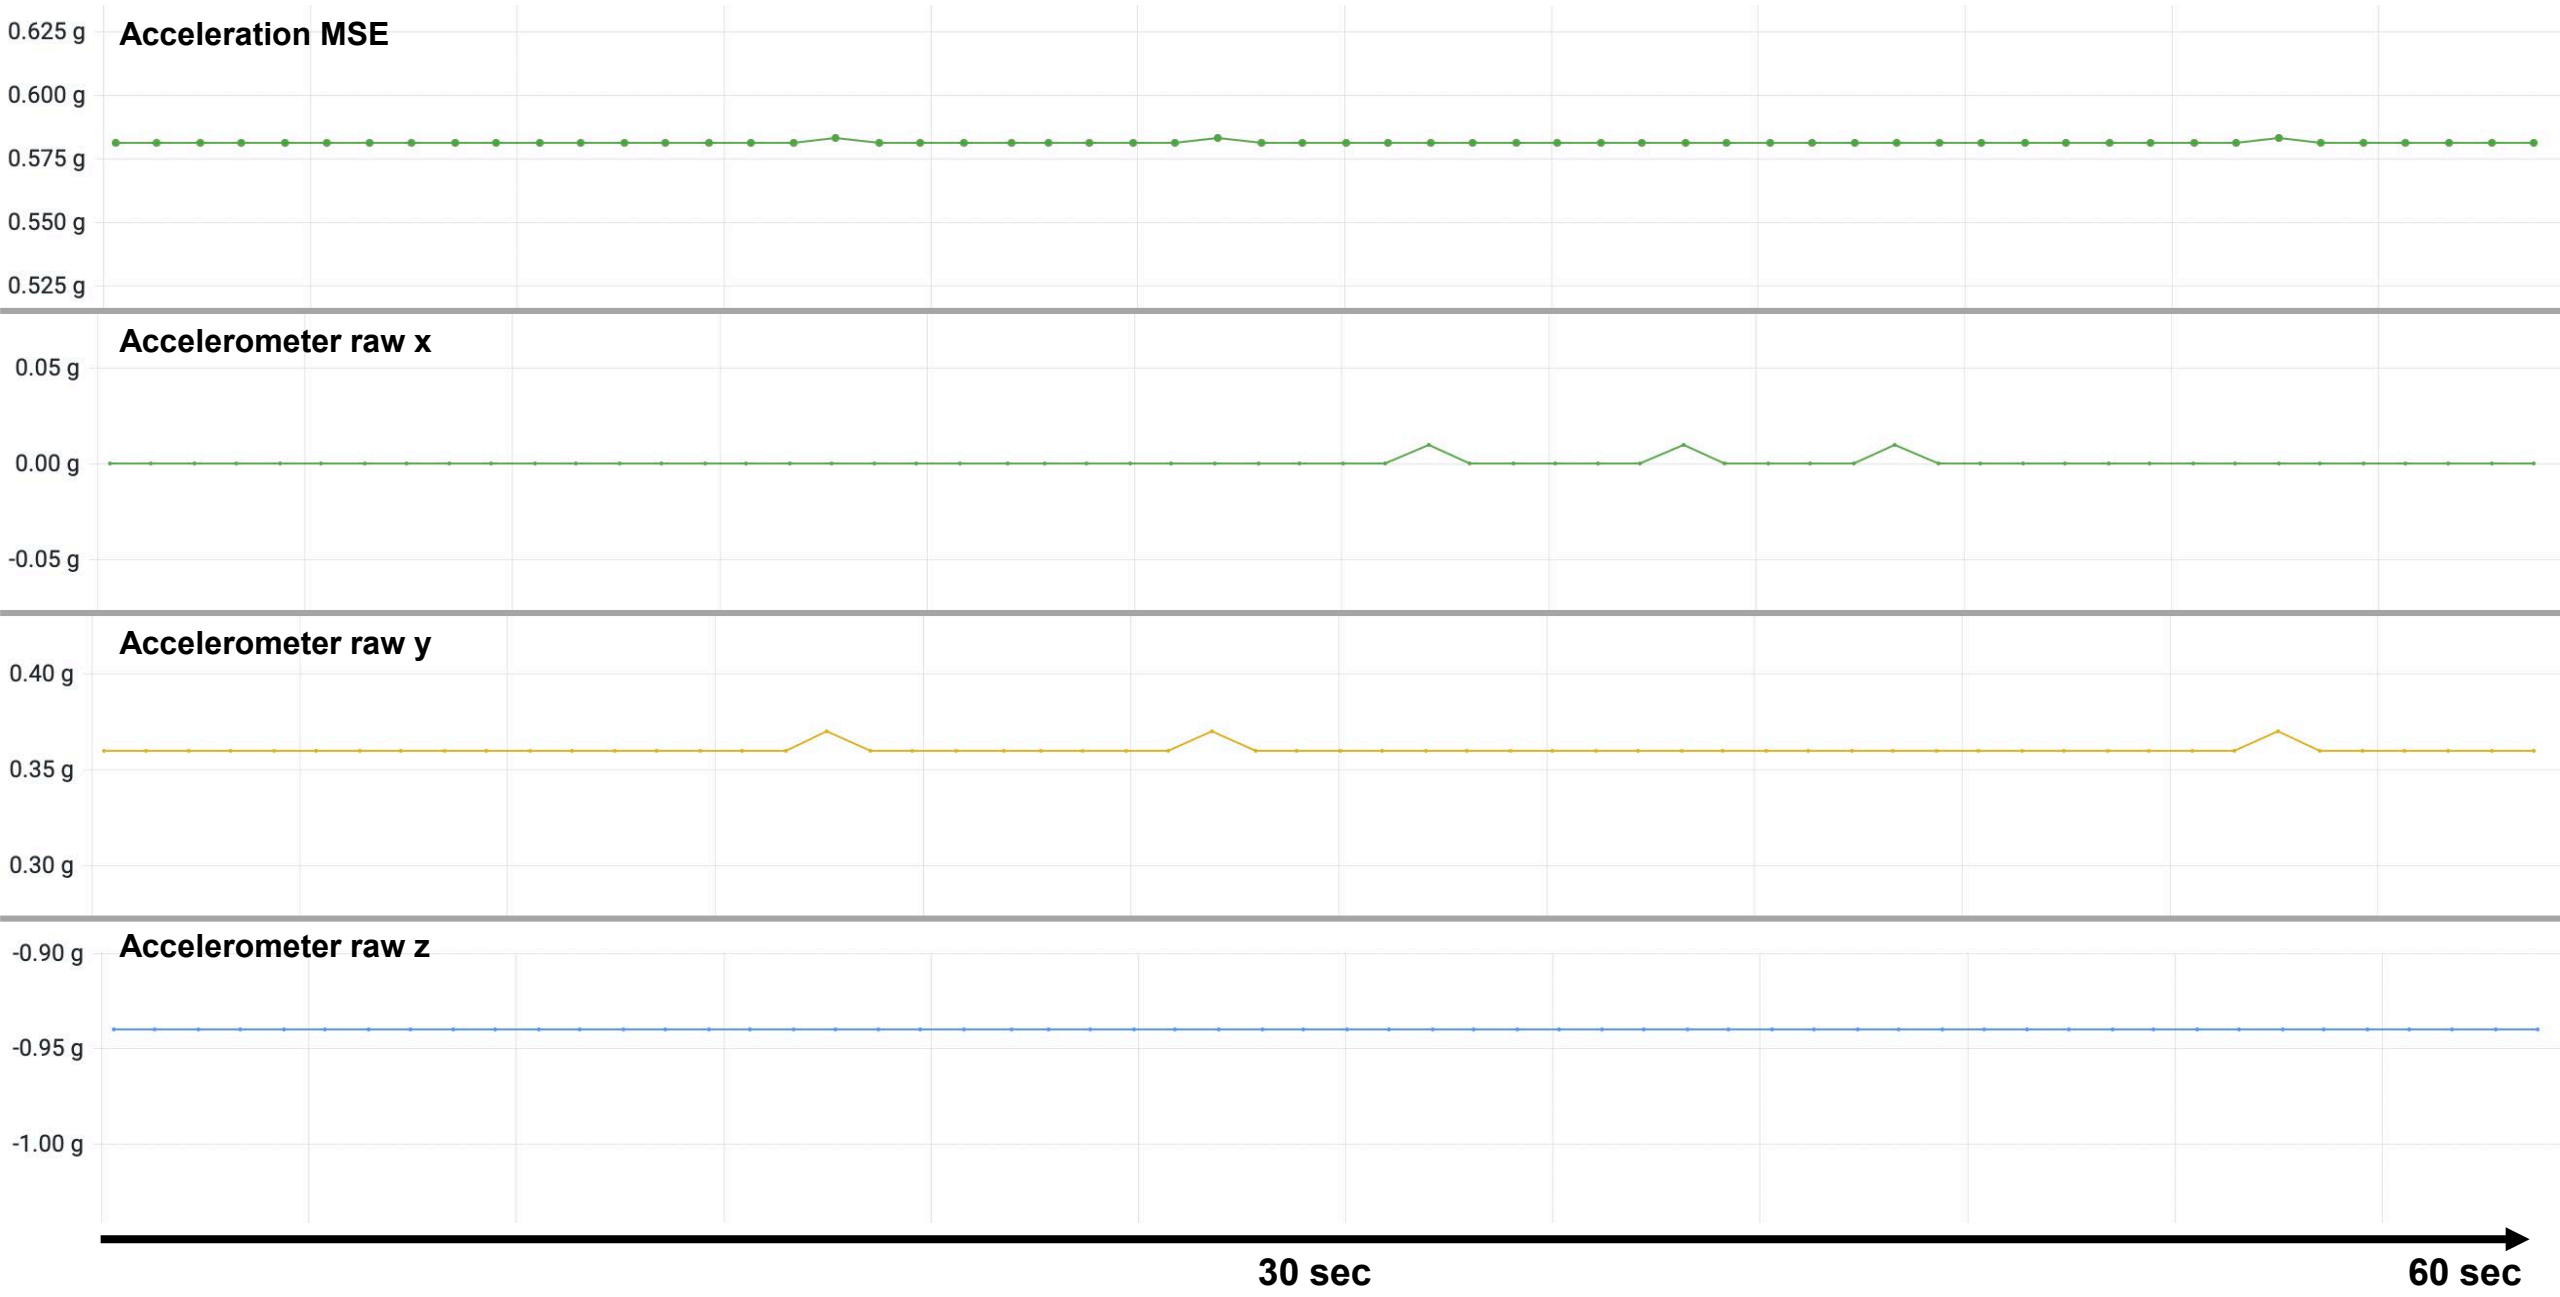

Scene 2: Subject in bed, wires being attached for standard monitoring

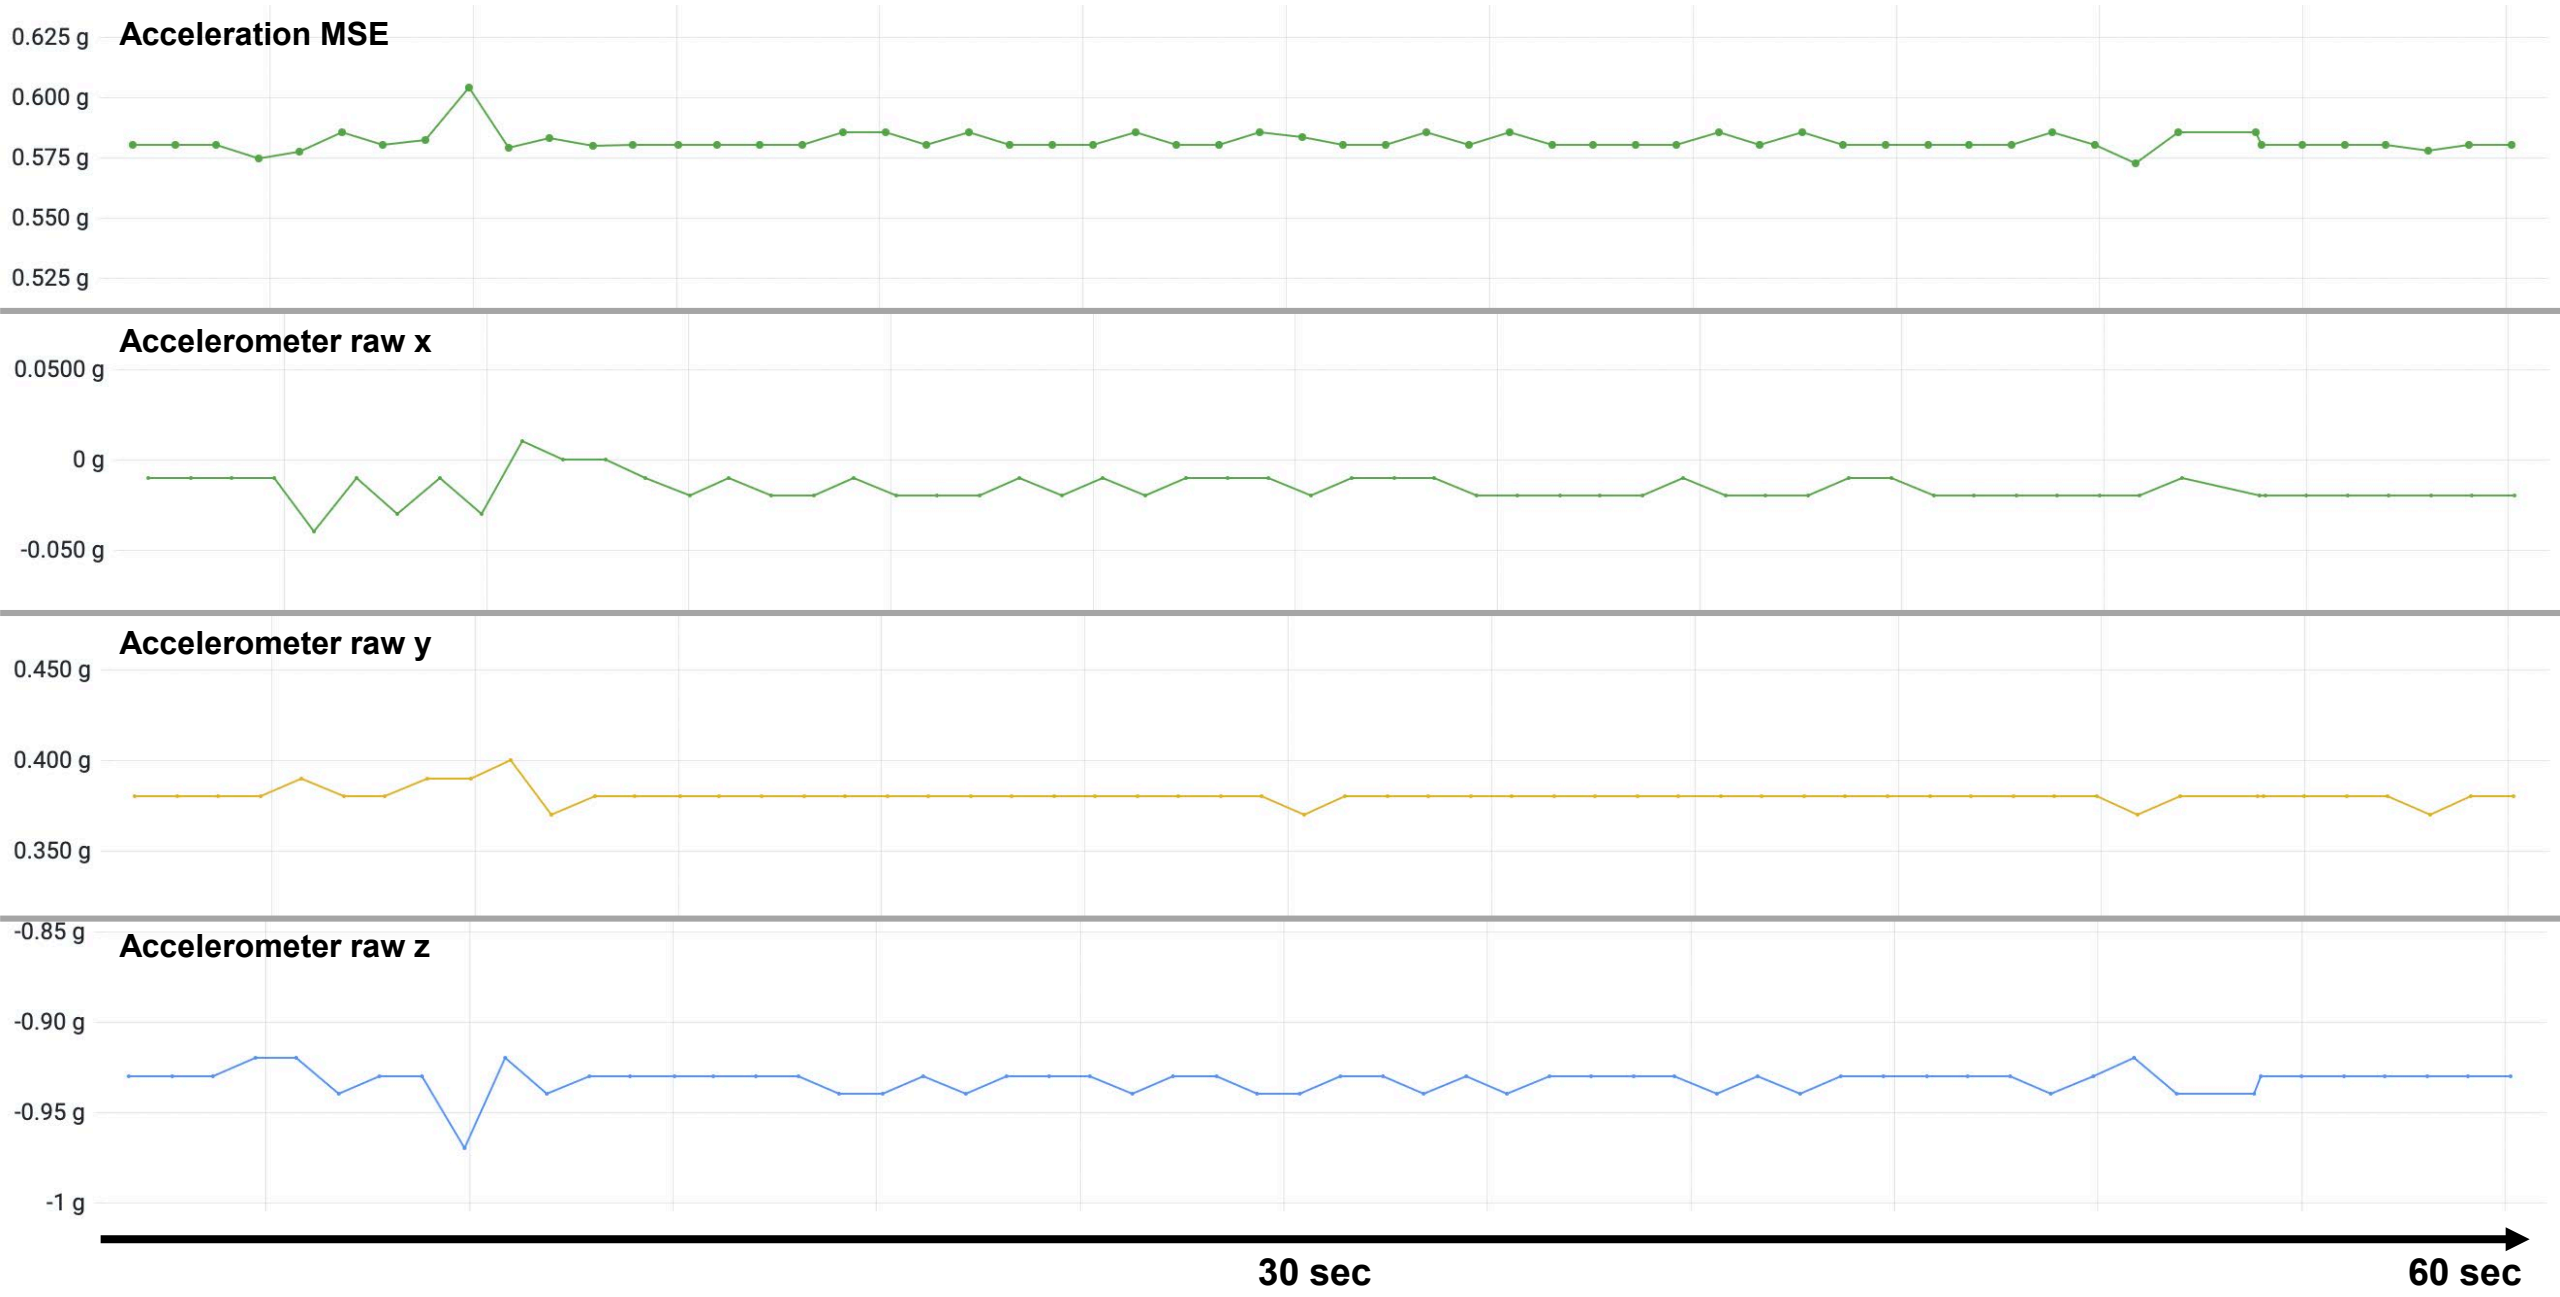

Scene 3: Subject in bed detaches wires

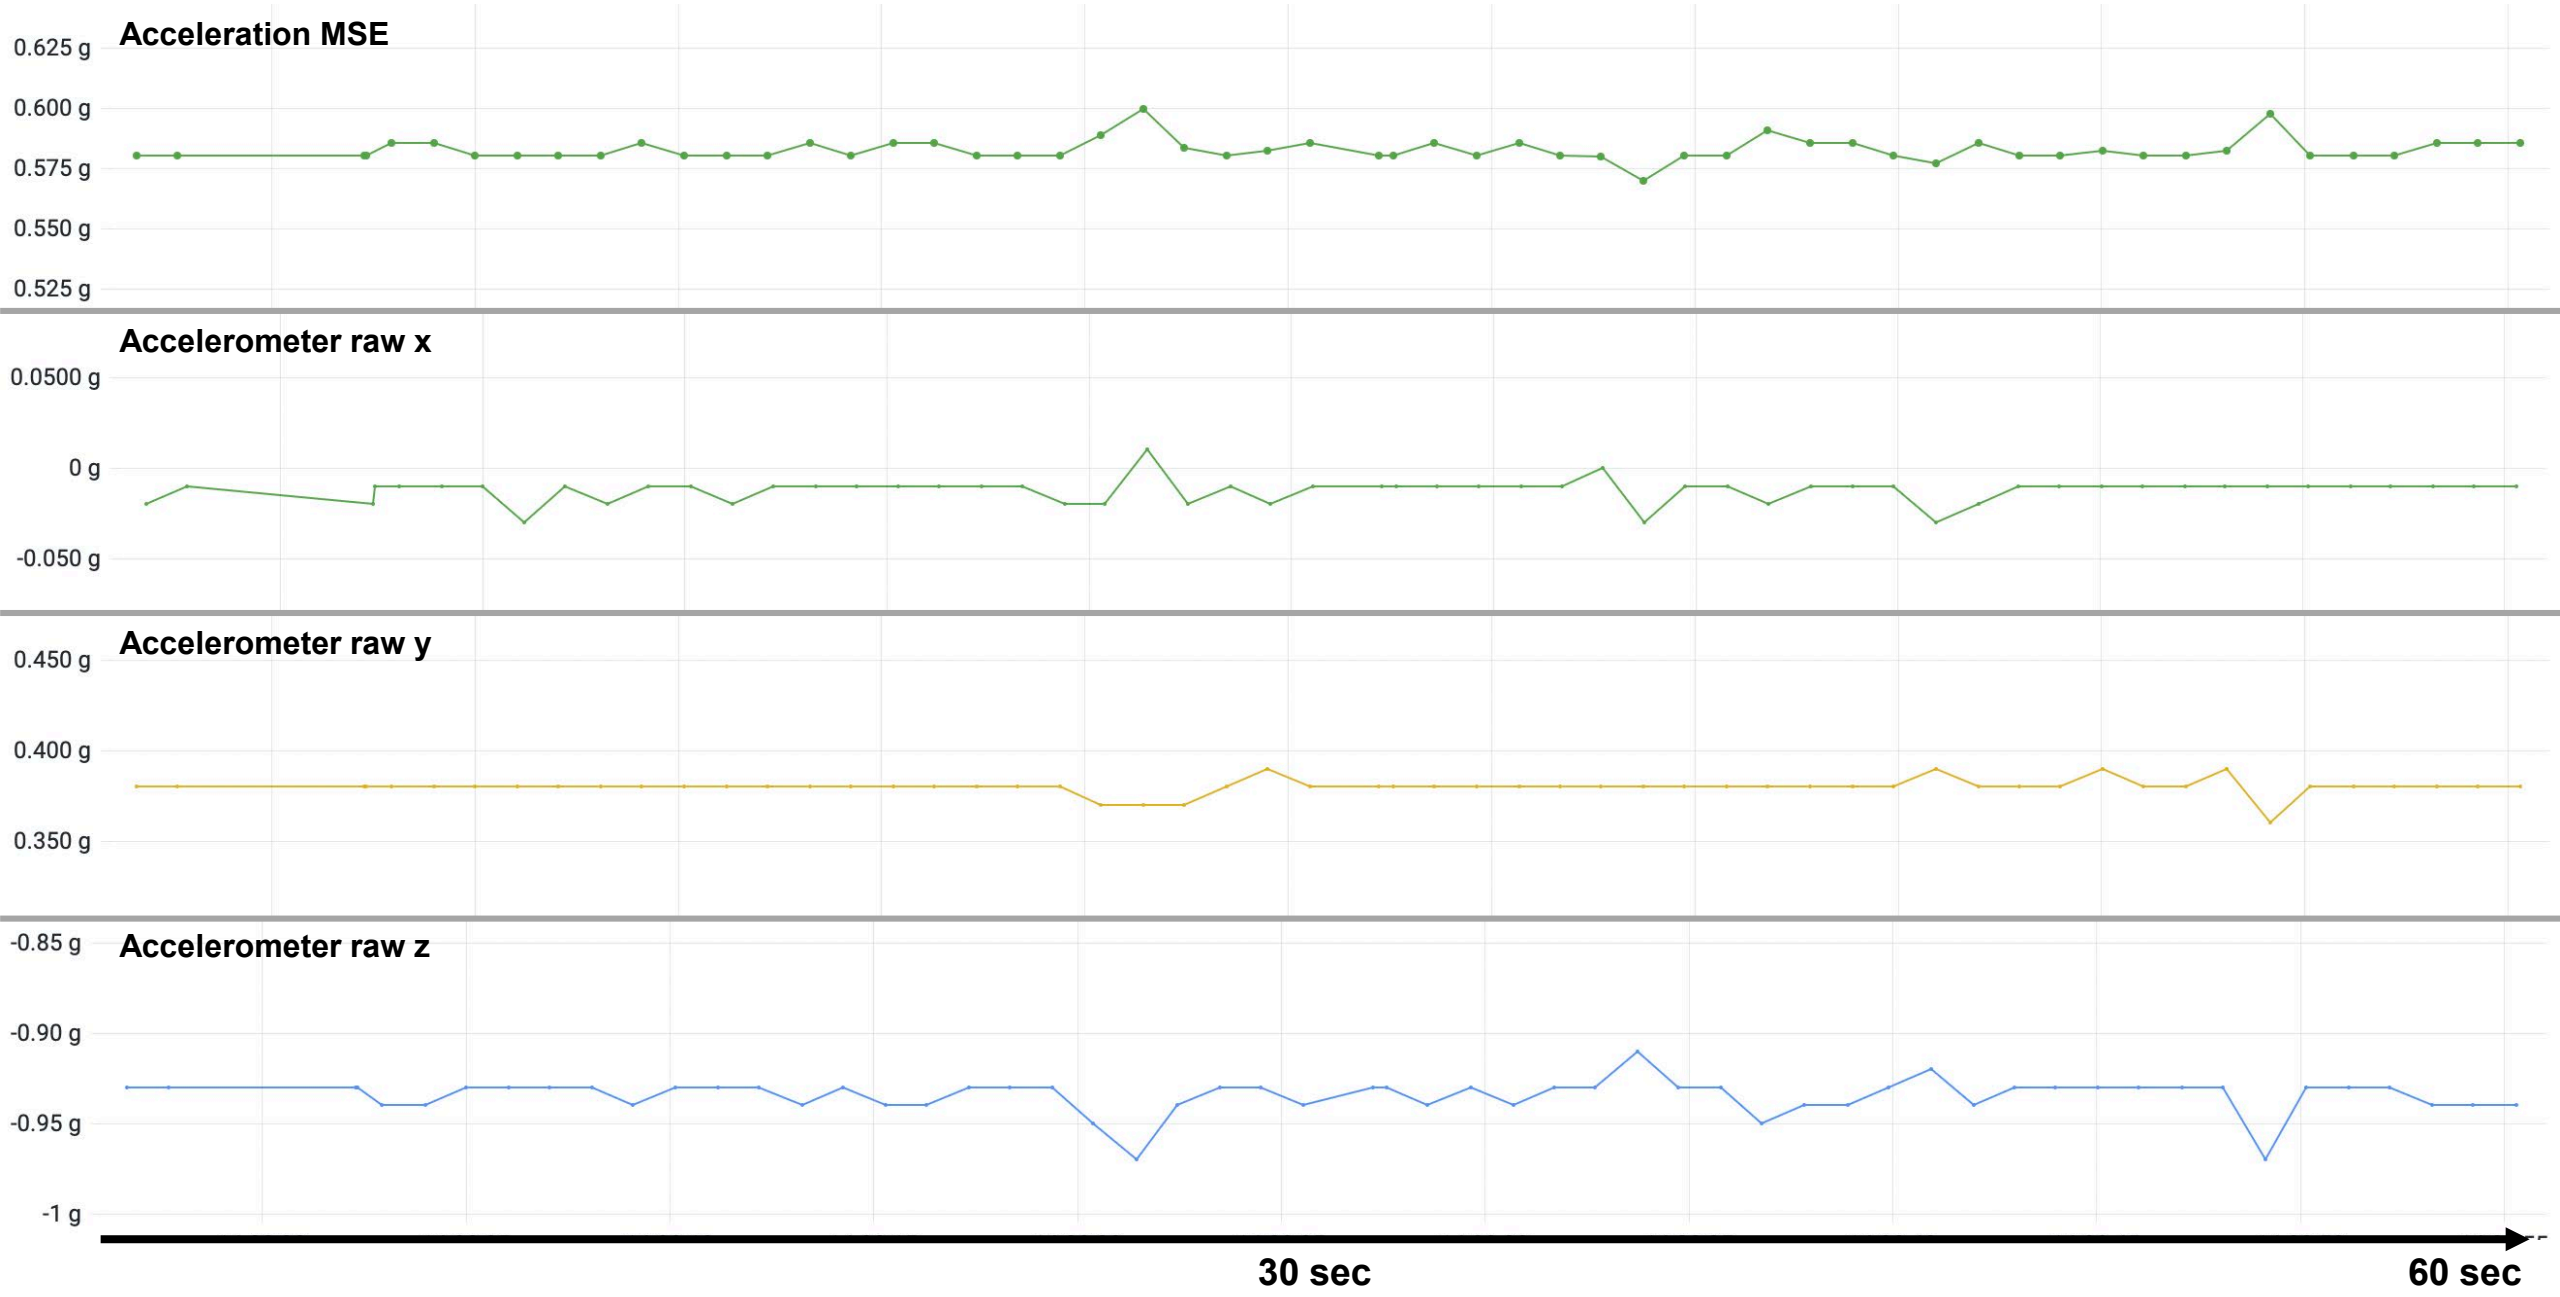

Scene 4: Subject in bed, lying uneasy and restless

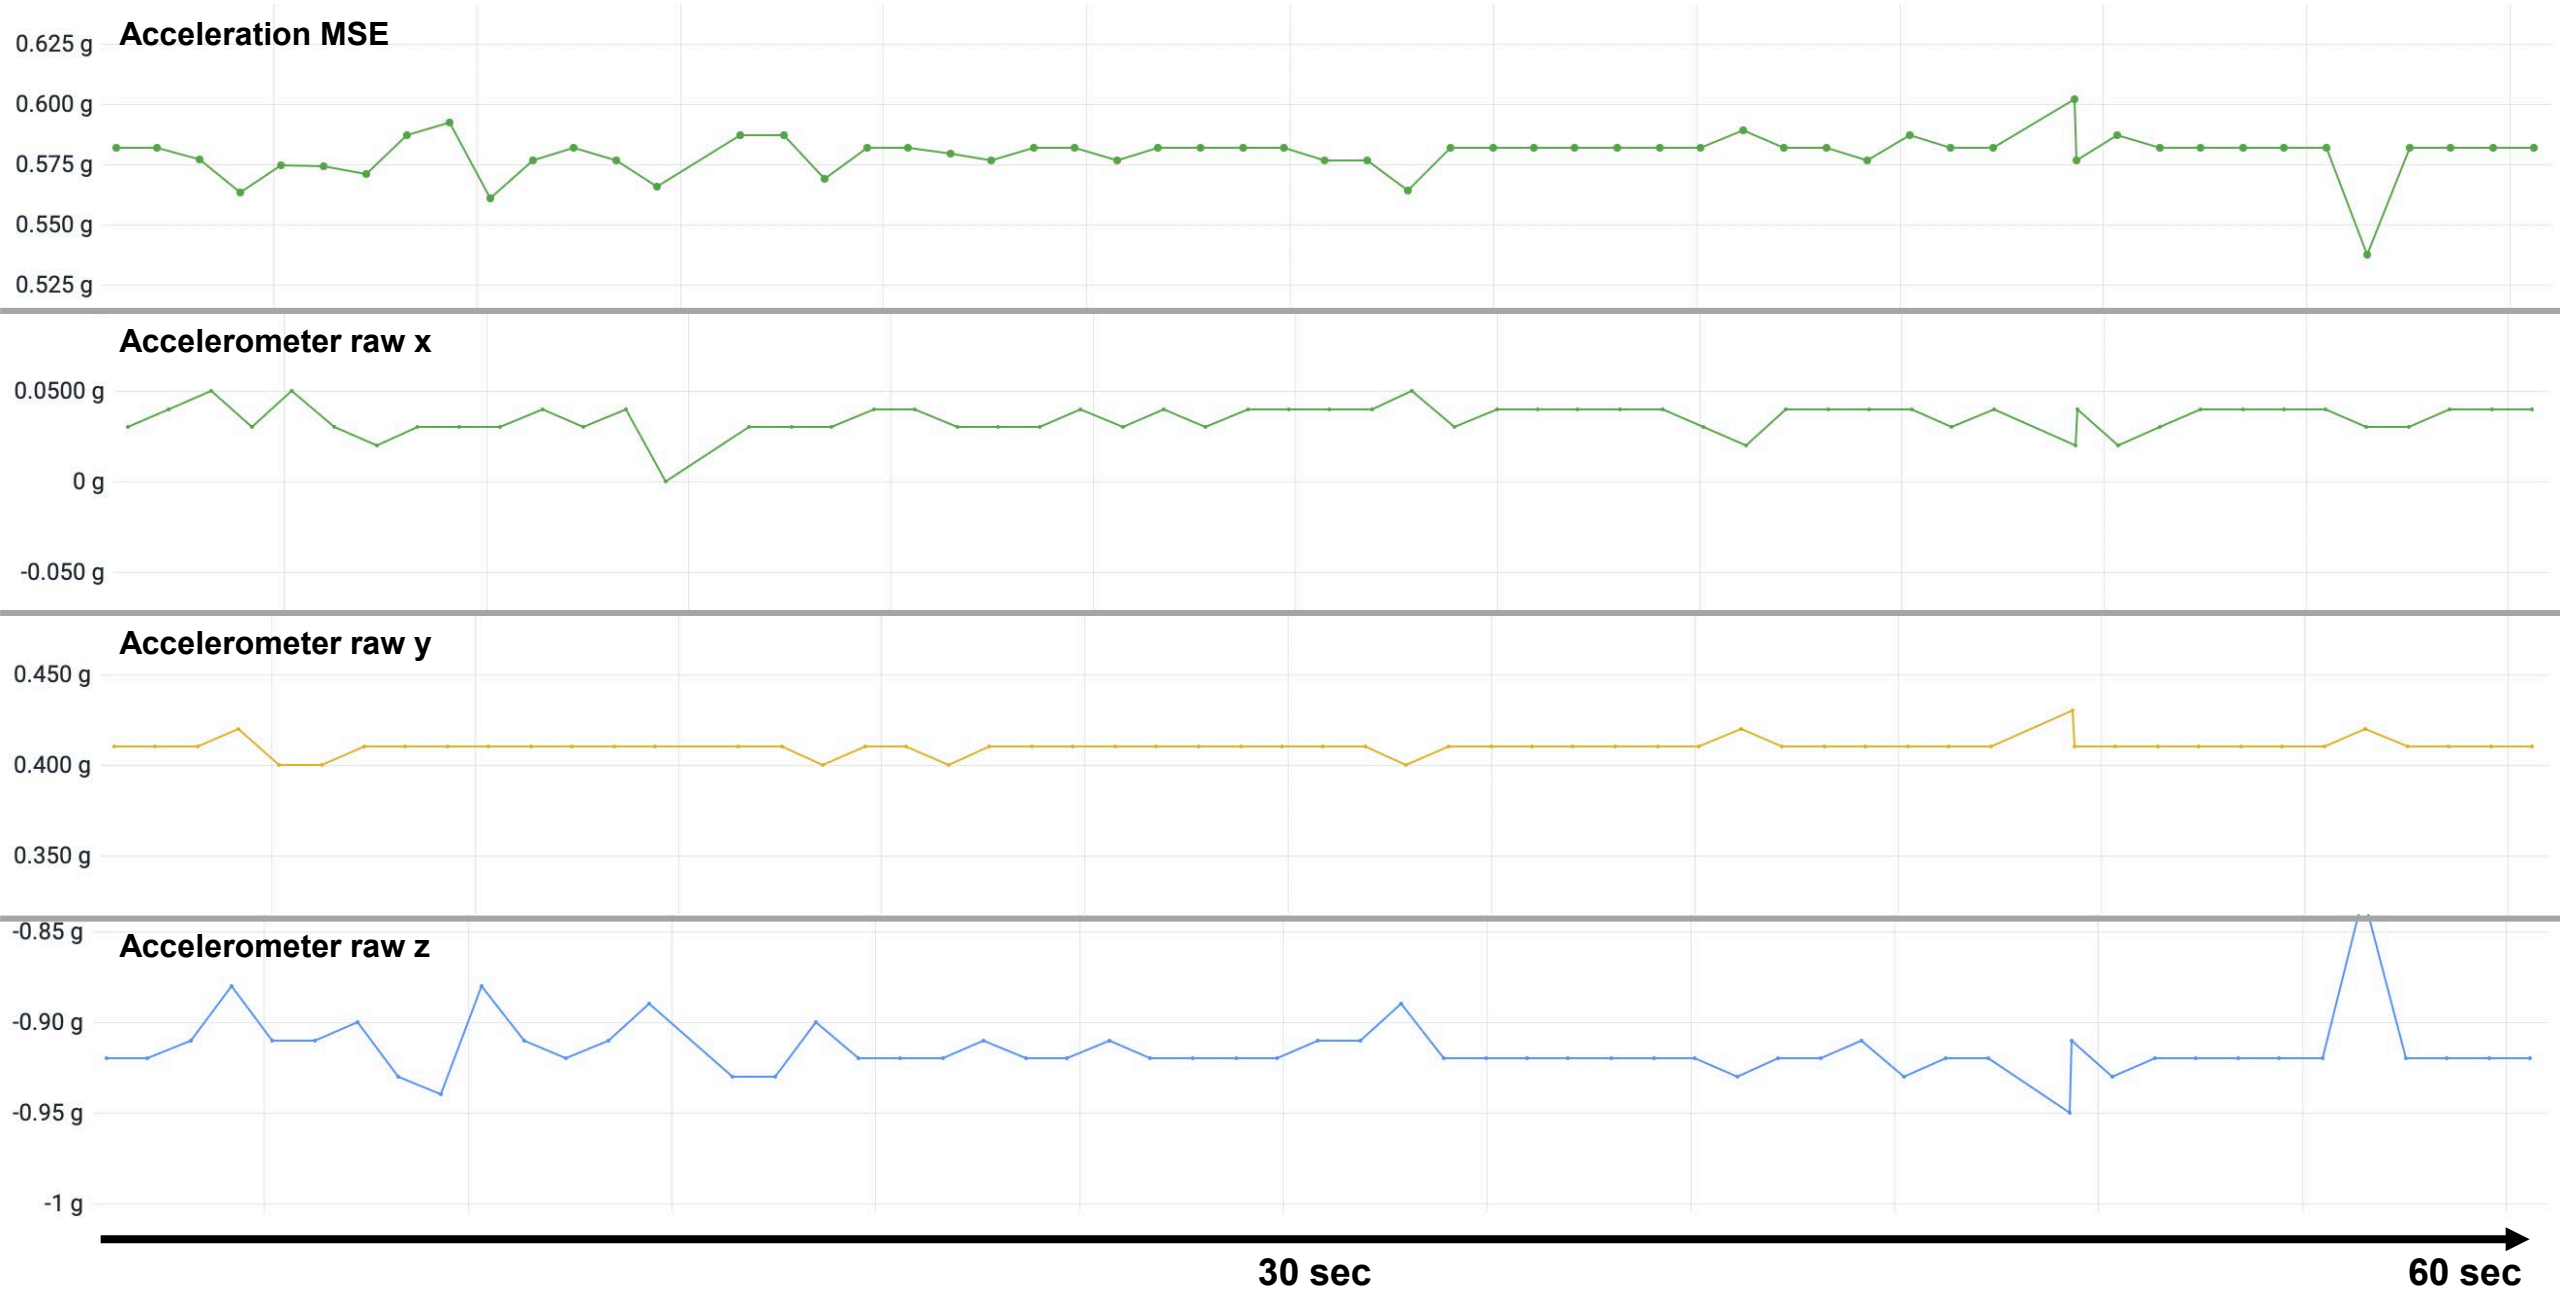

# Scene 5, 9, 12, 15, 17: Subject lying in bed motionless, breathing shallow

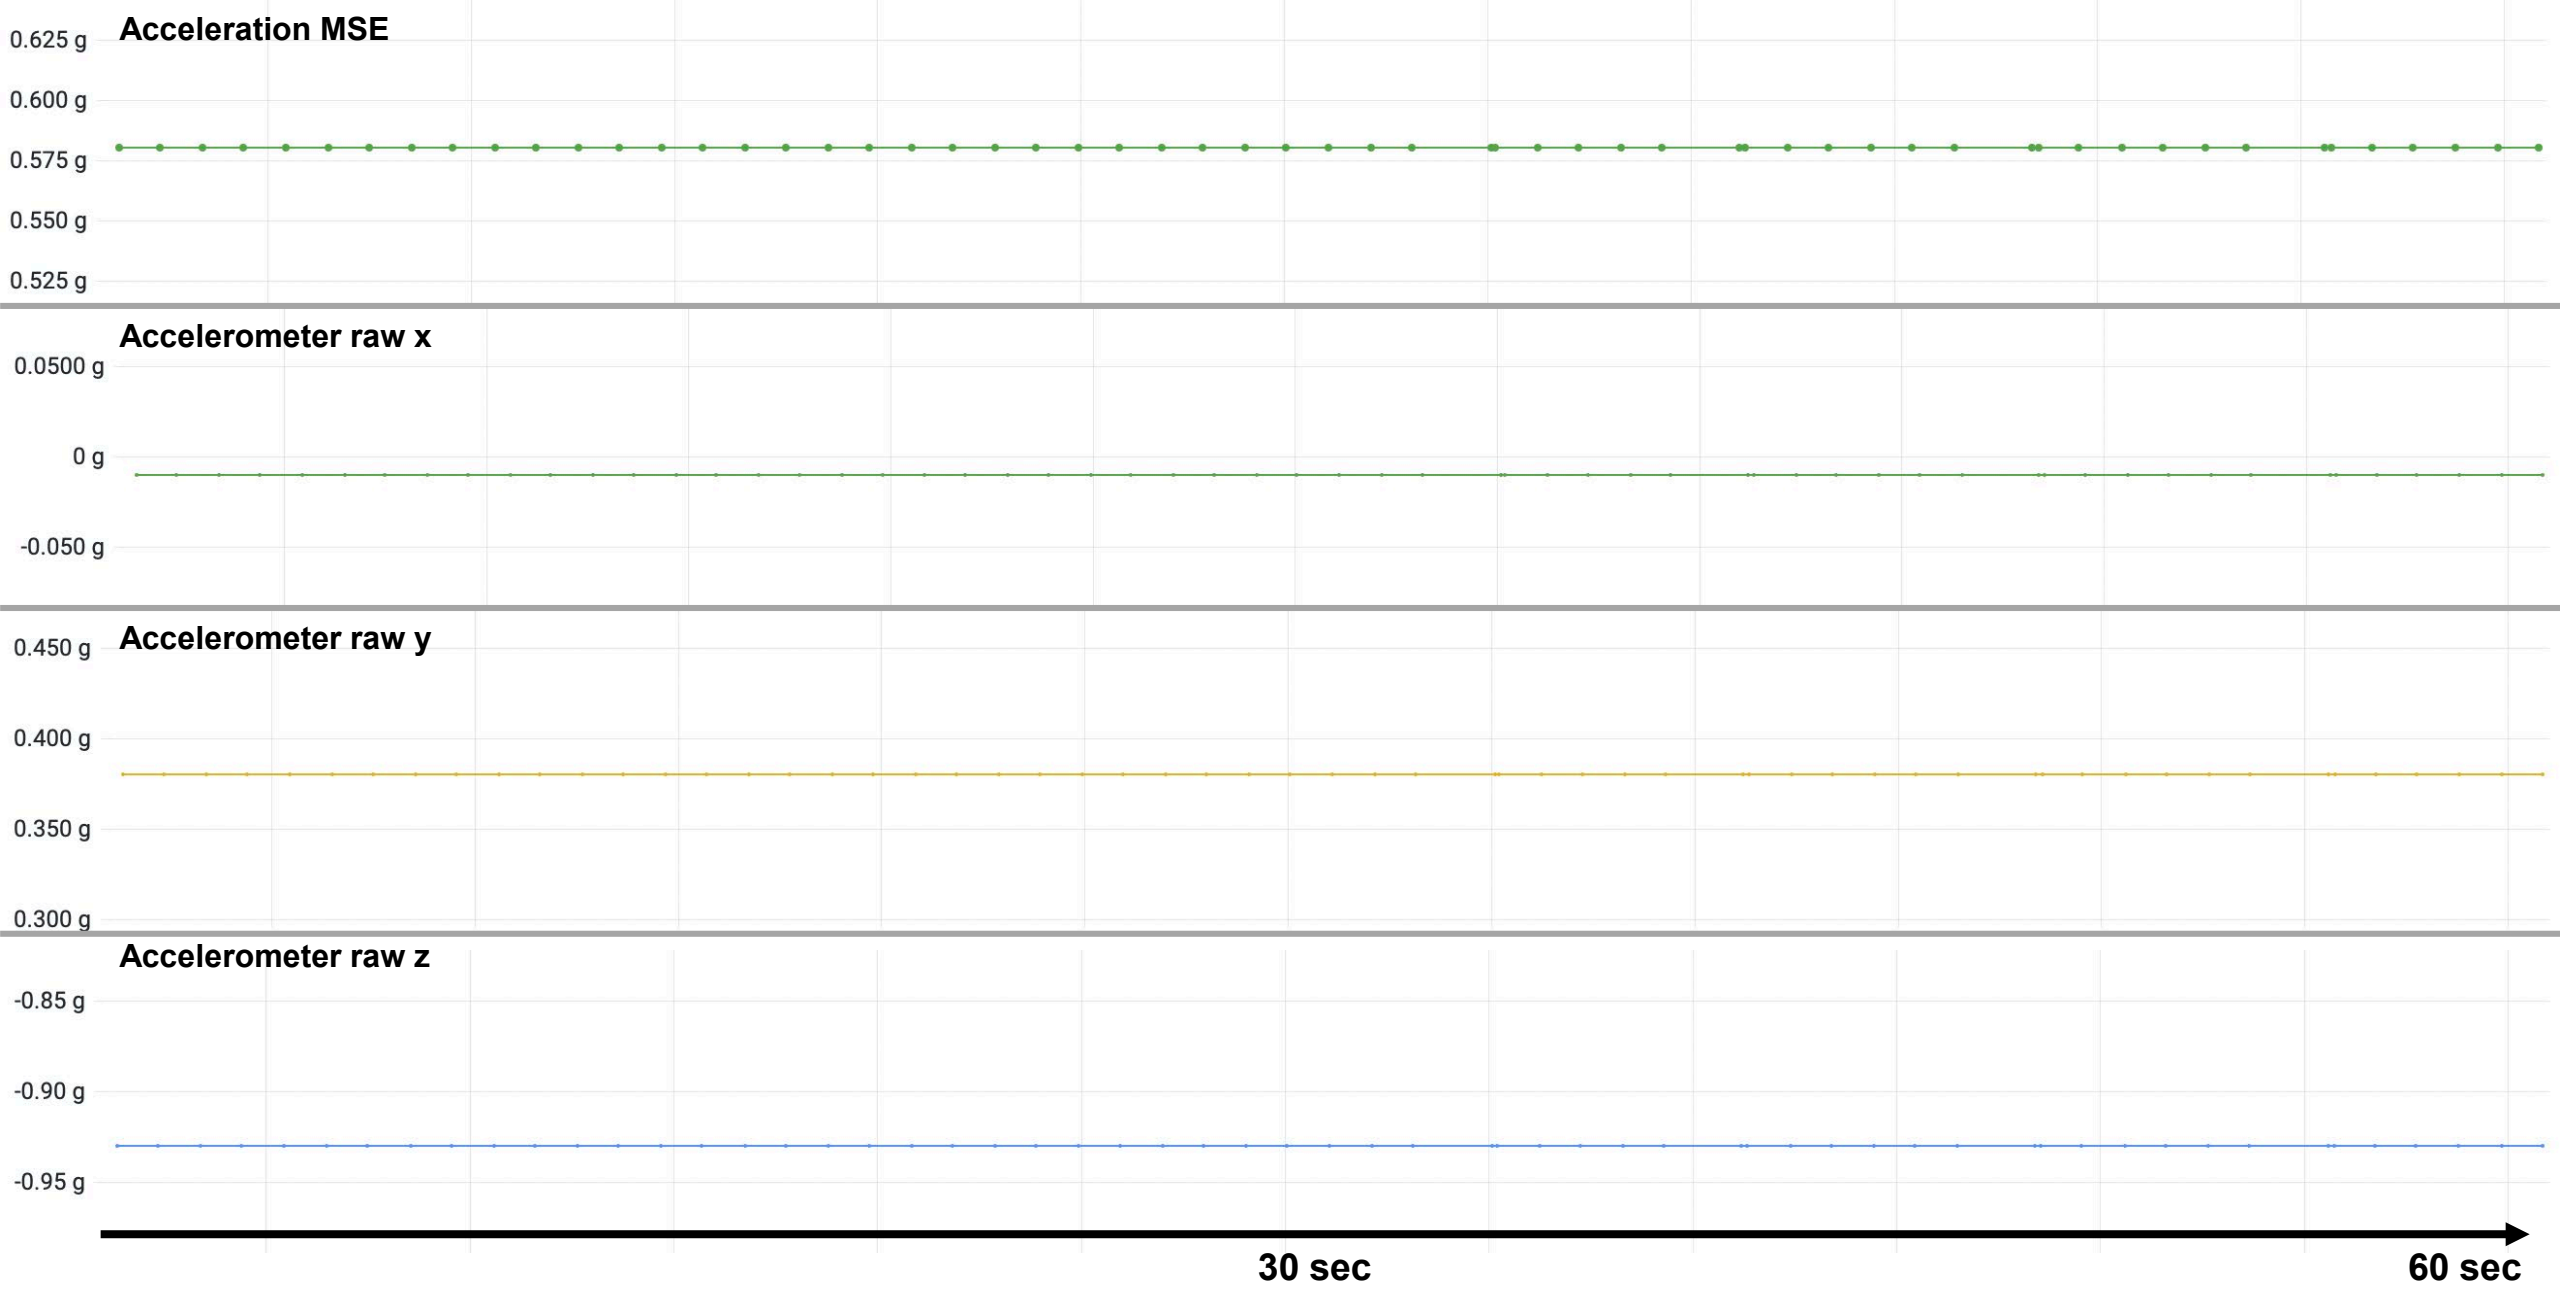

# Scene 6: Subject in bed, tossing and turning

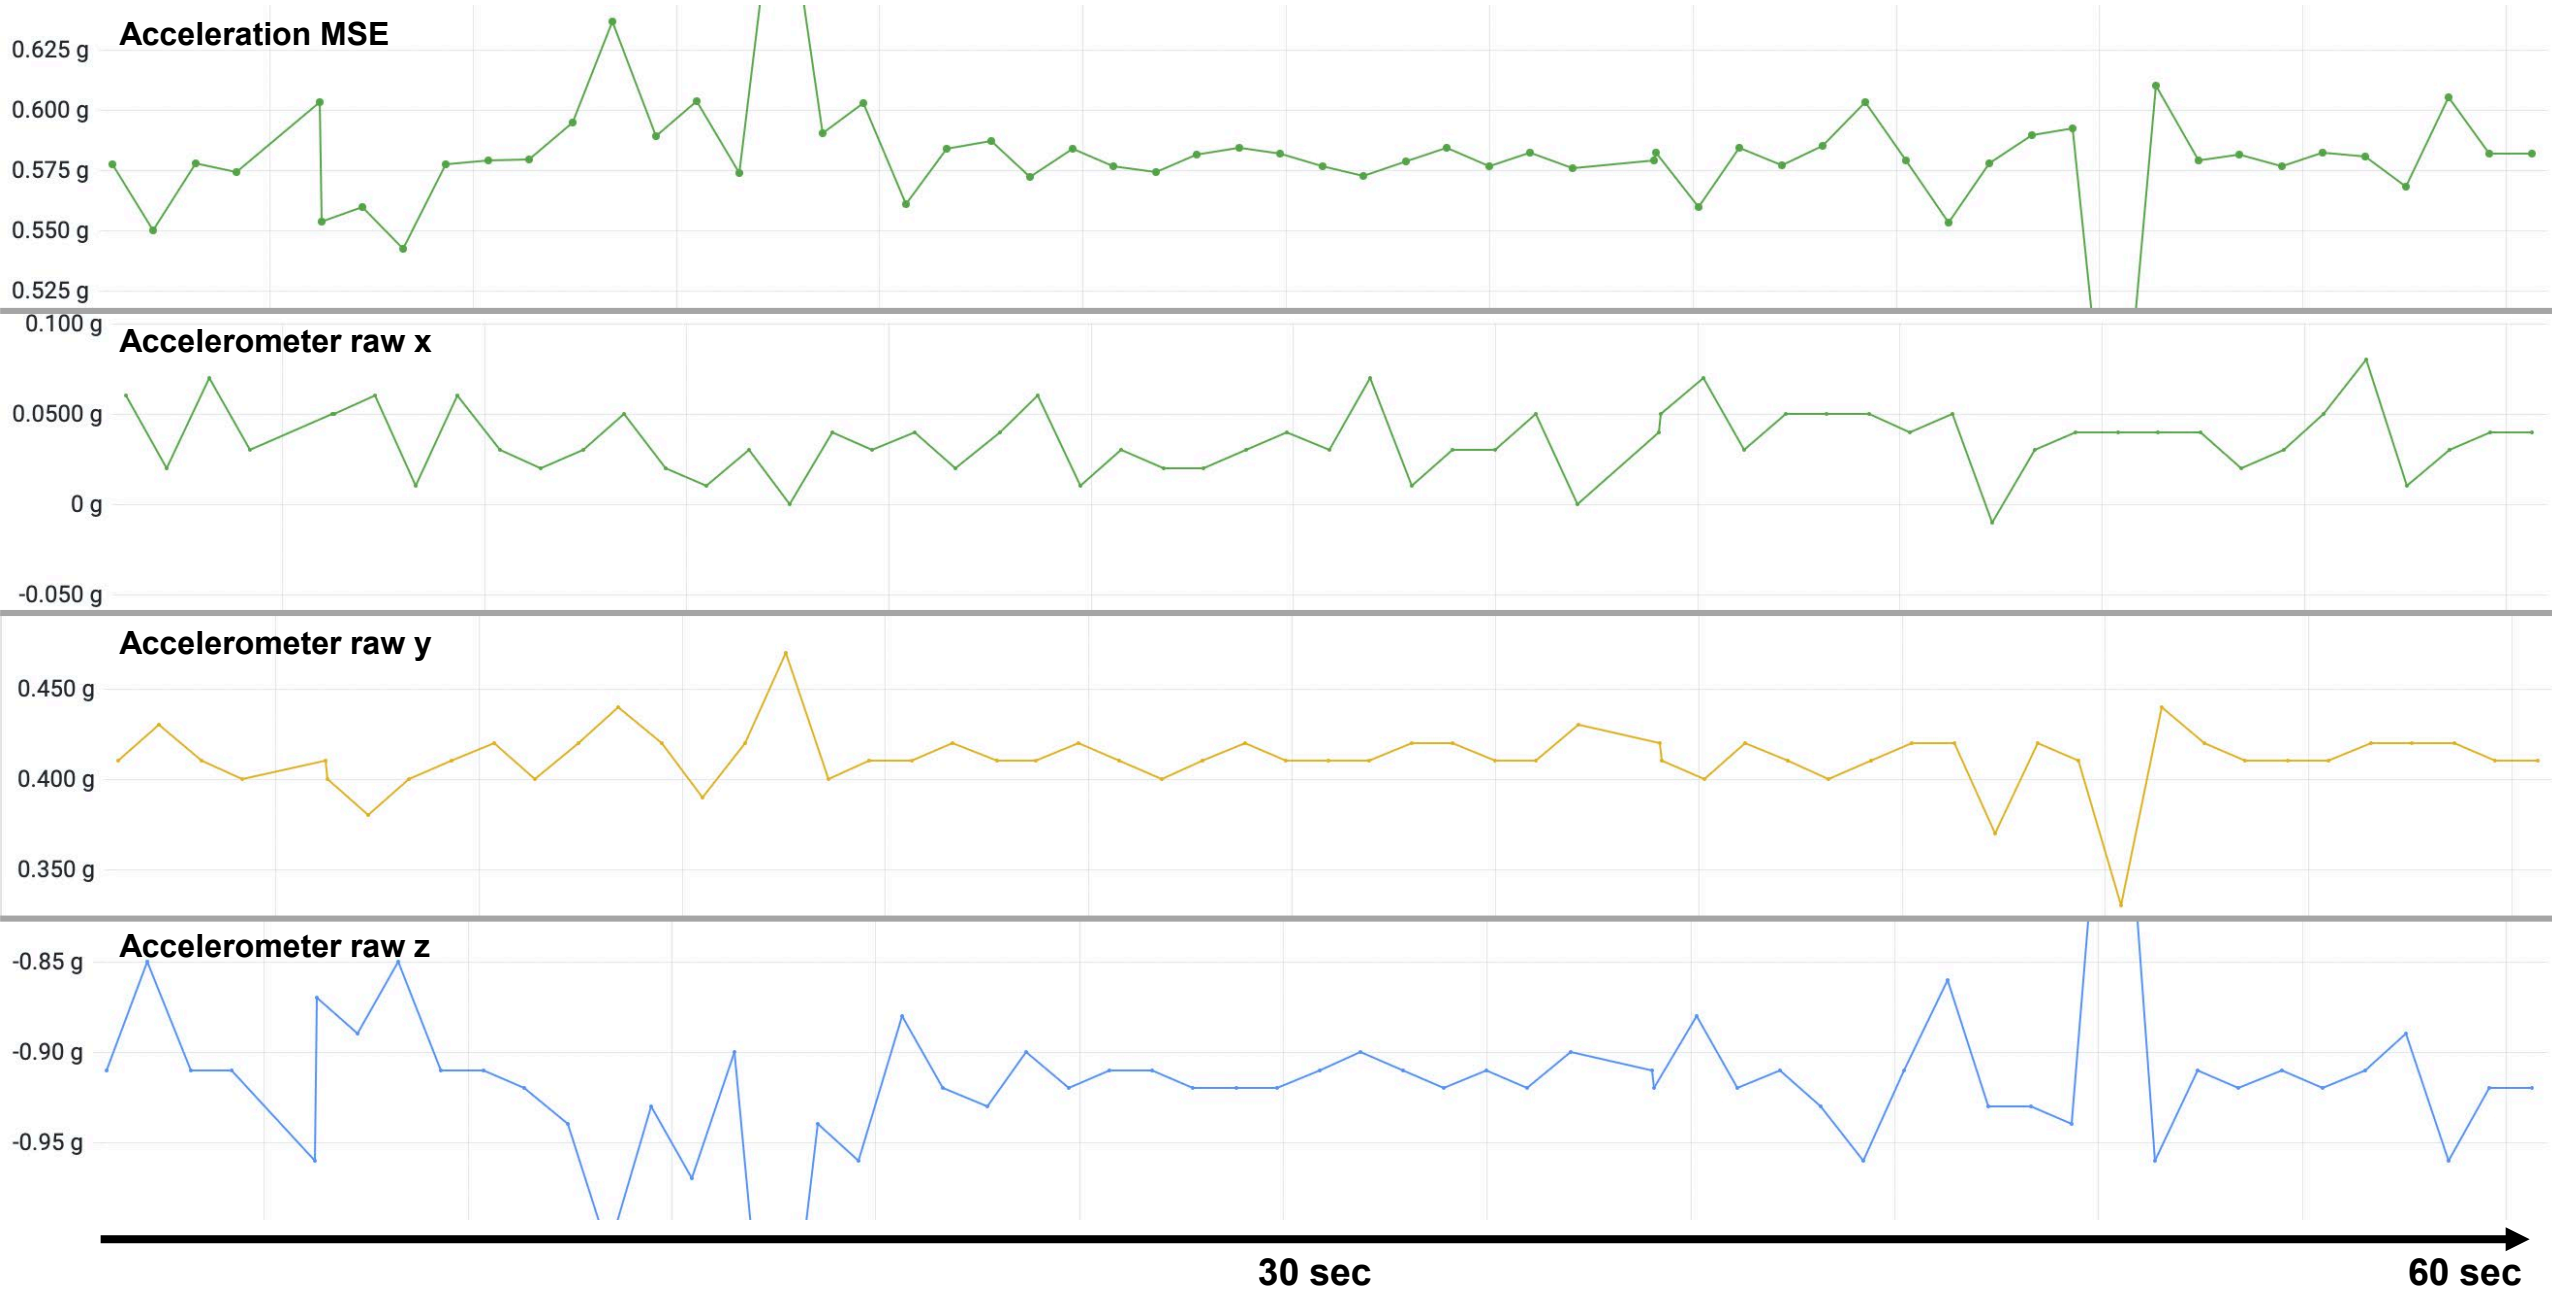

## Scene 7: Subject lying in bed motionless, breathing normal

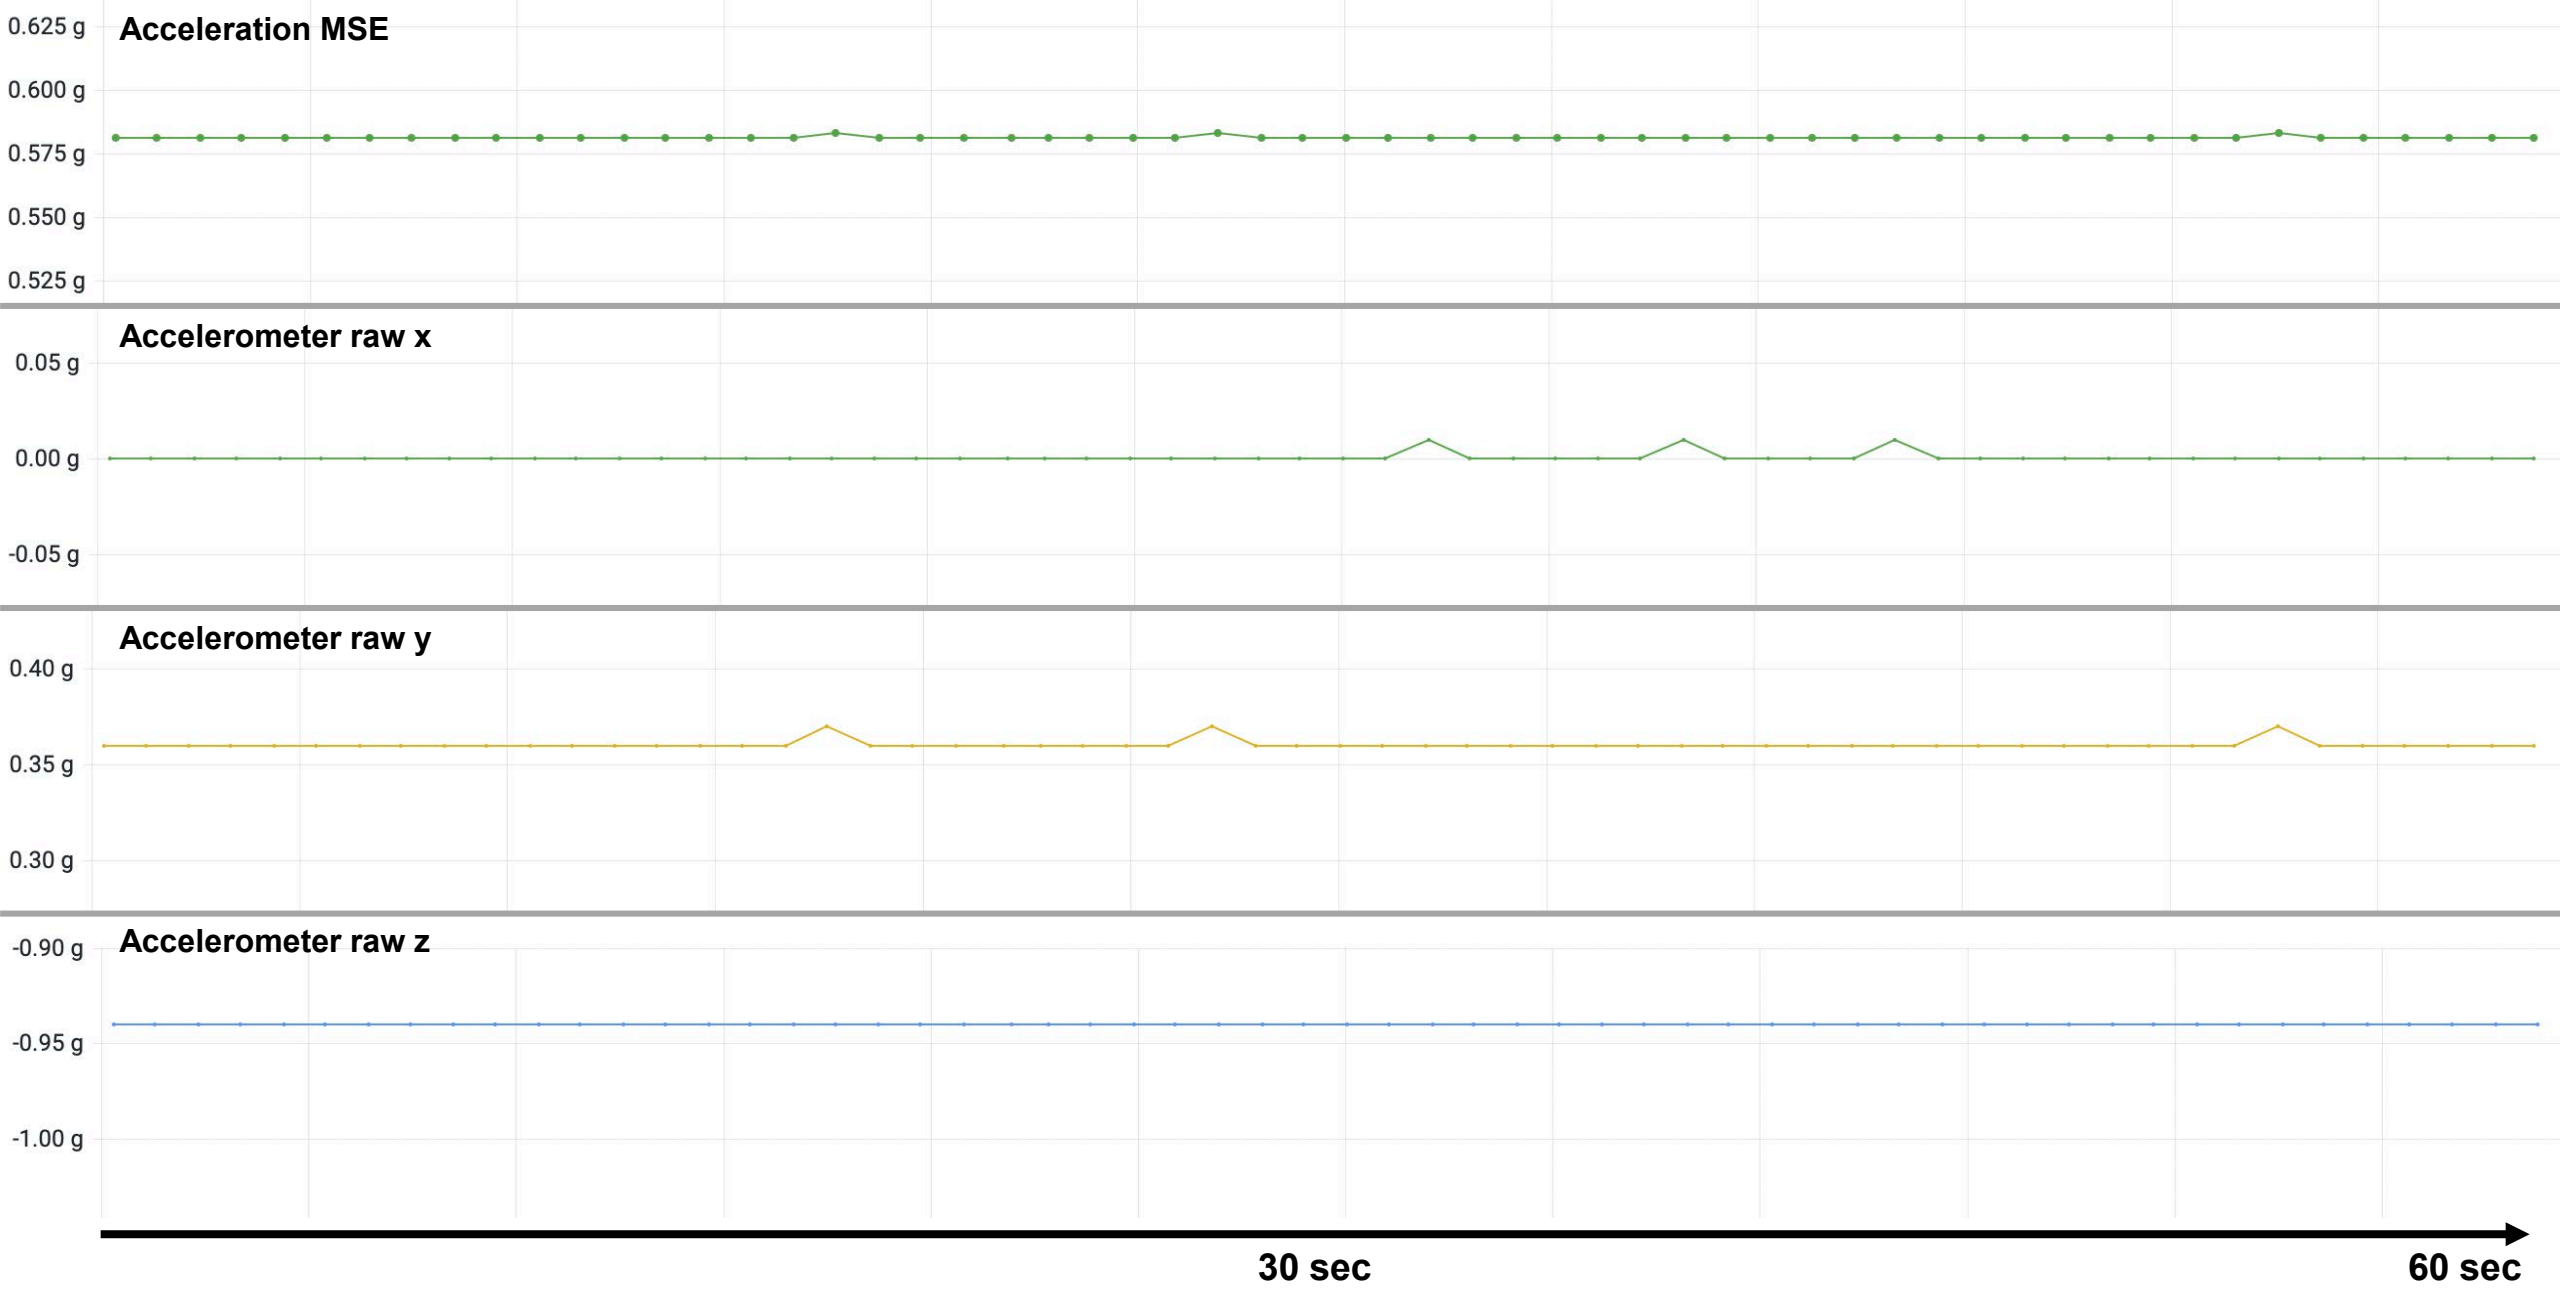



# Scene 8: Subject in bed, jumping up and down

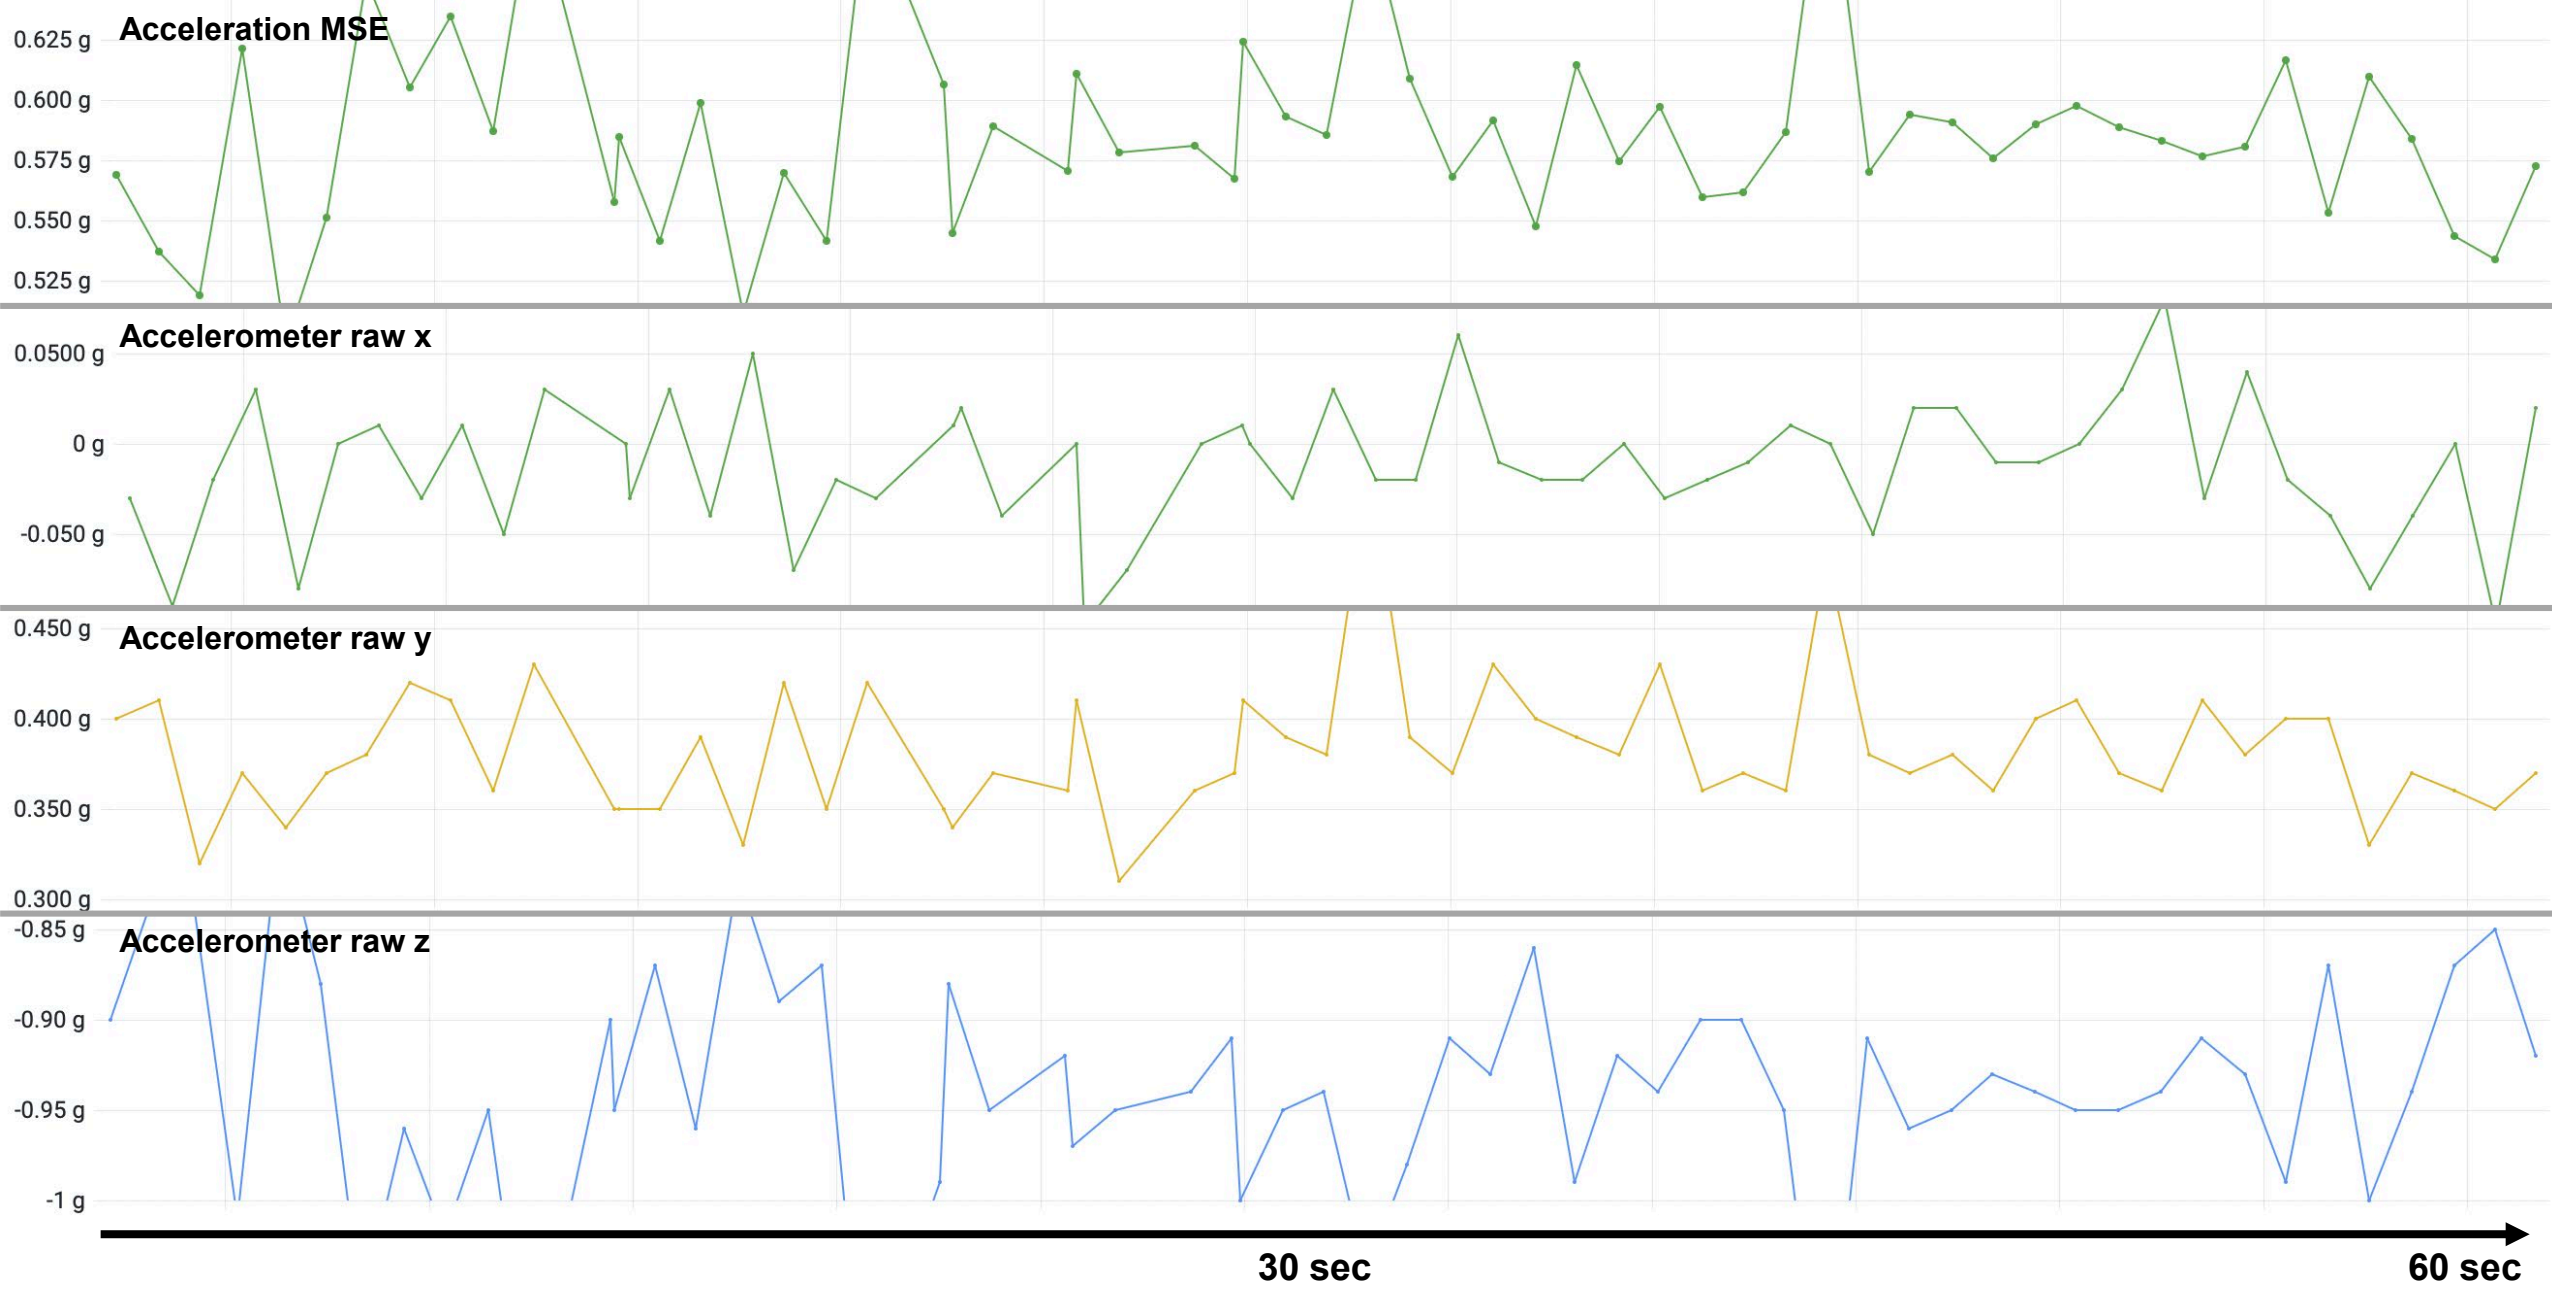

## Scene 10: Subject in bed with little and careful movements

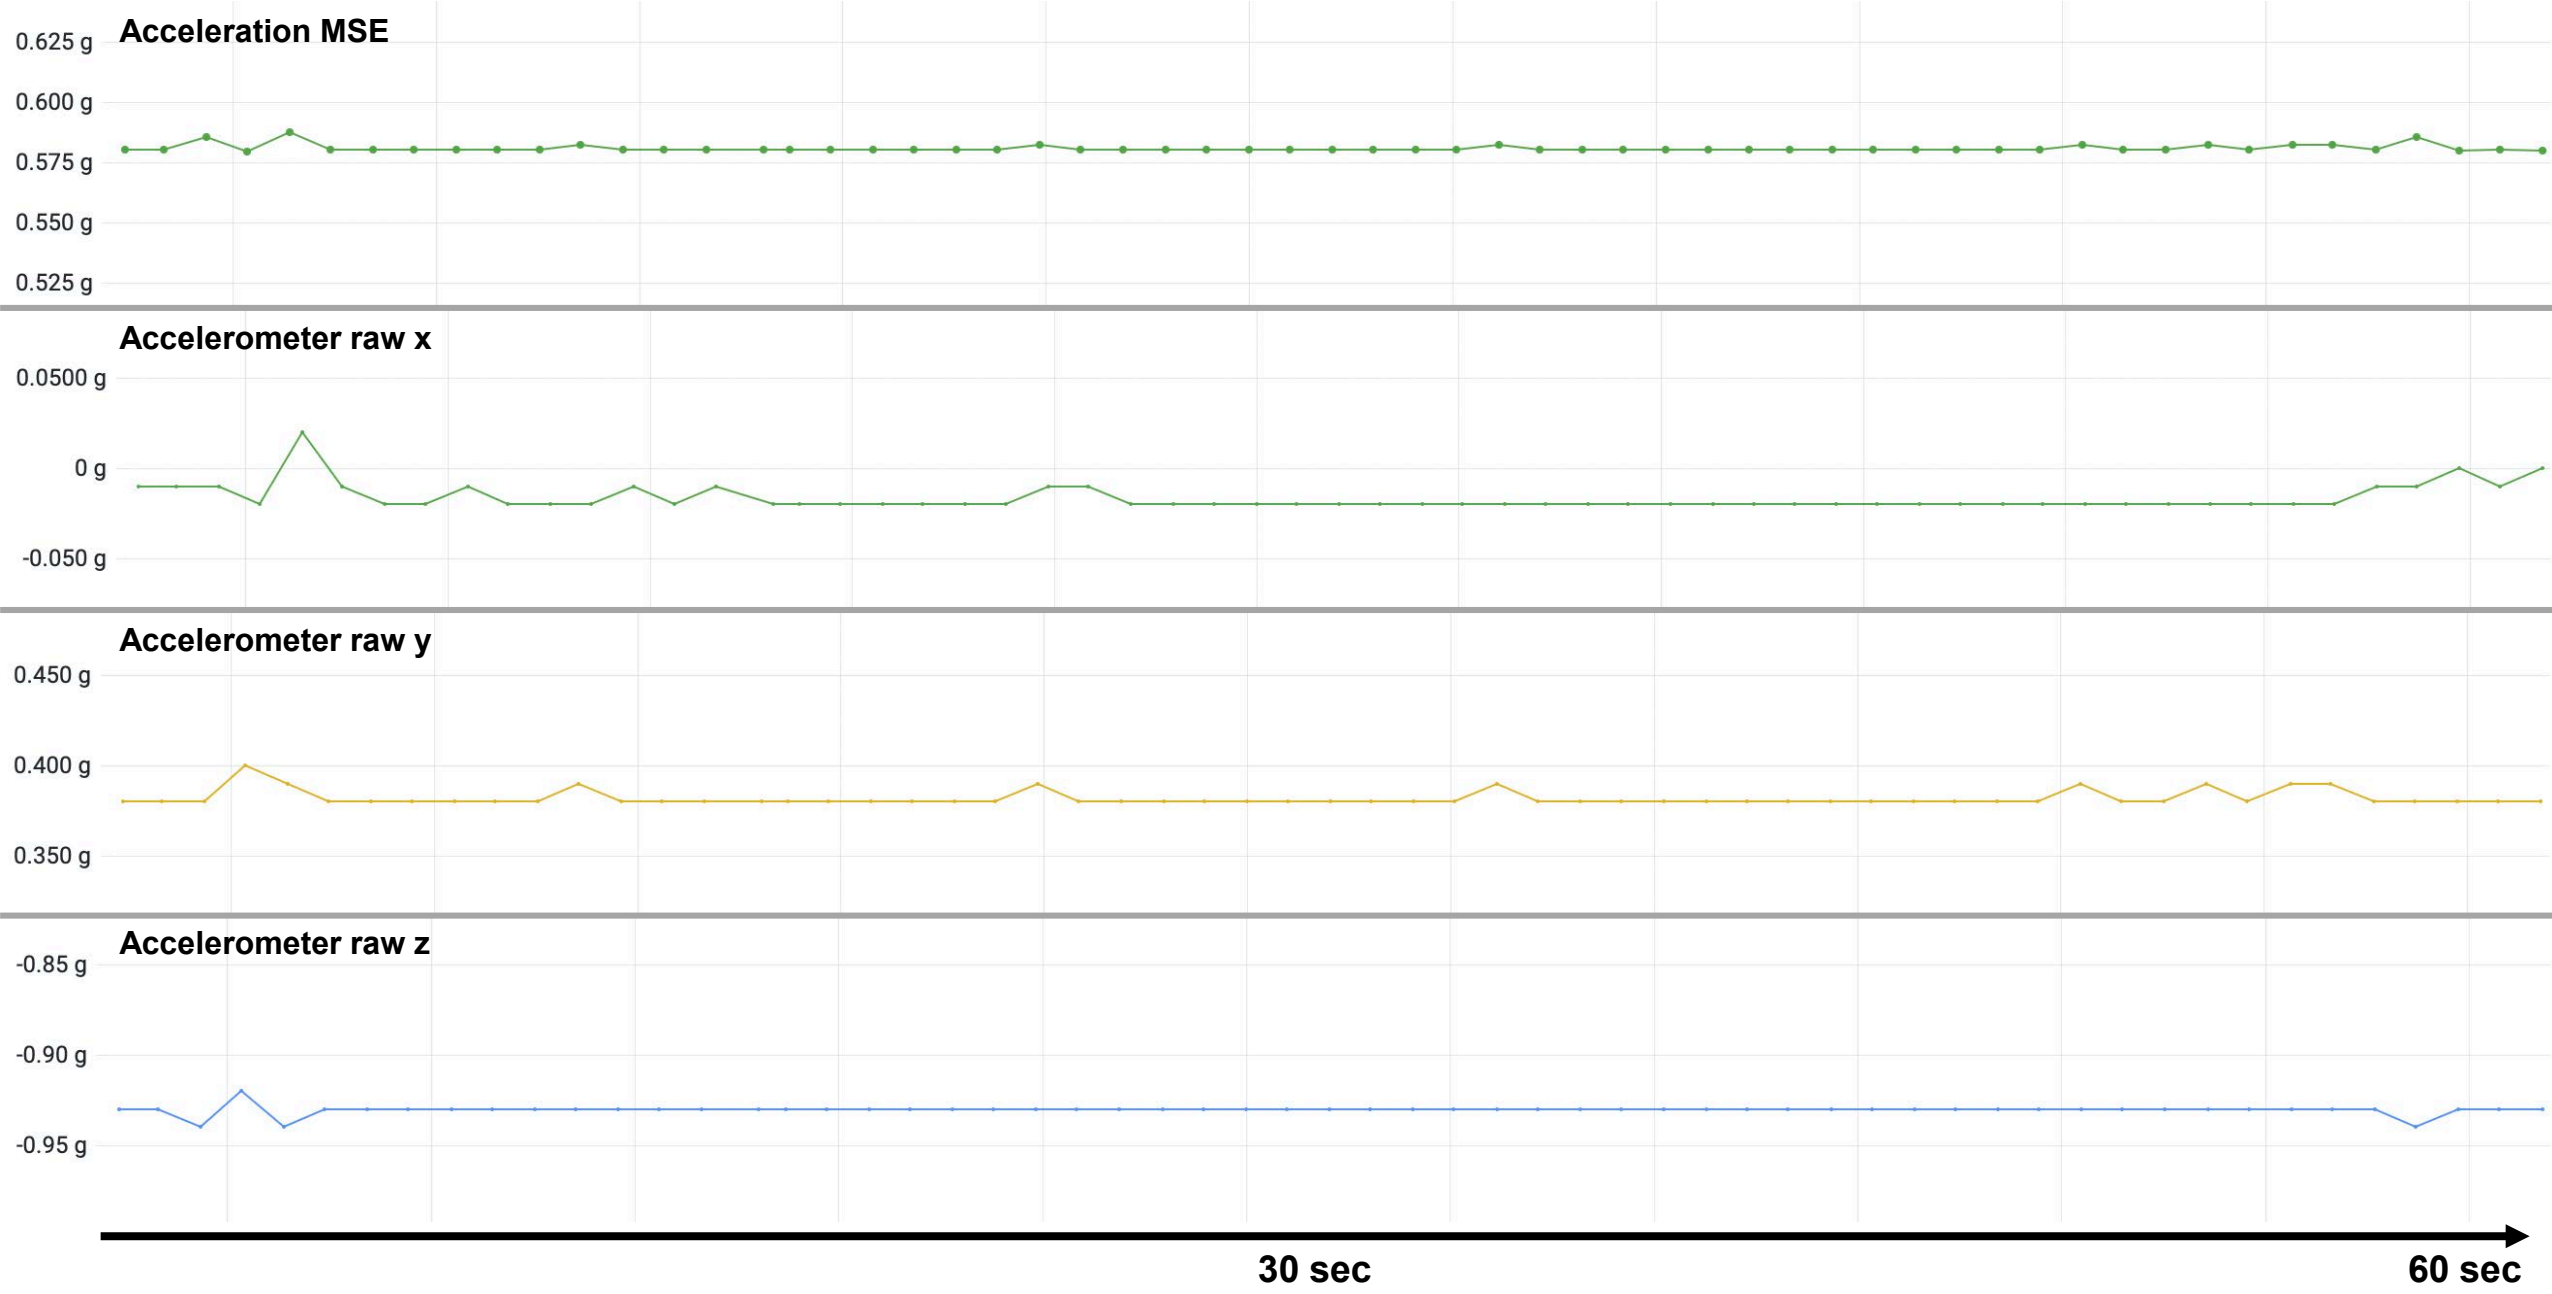

## Scene 11: Subjects lying in bed motionless, breathing strong

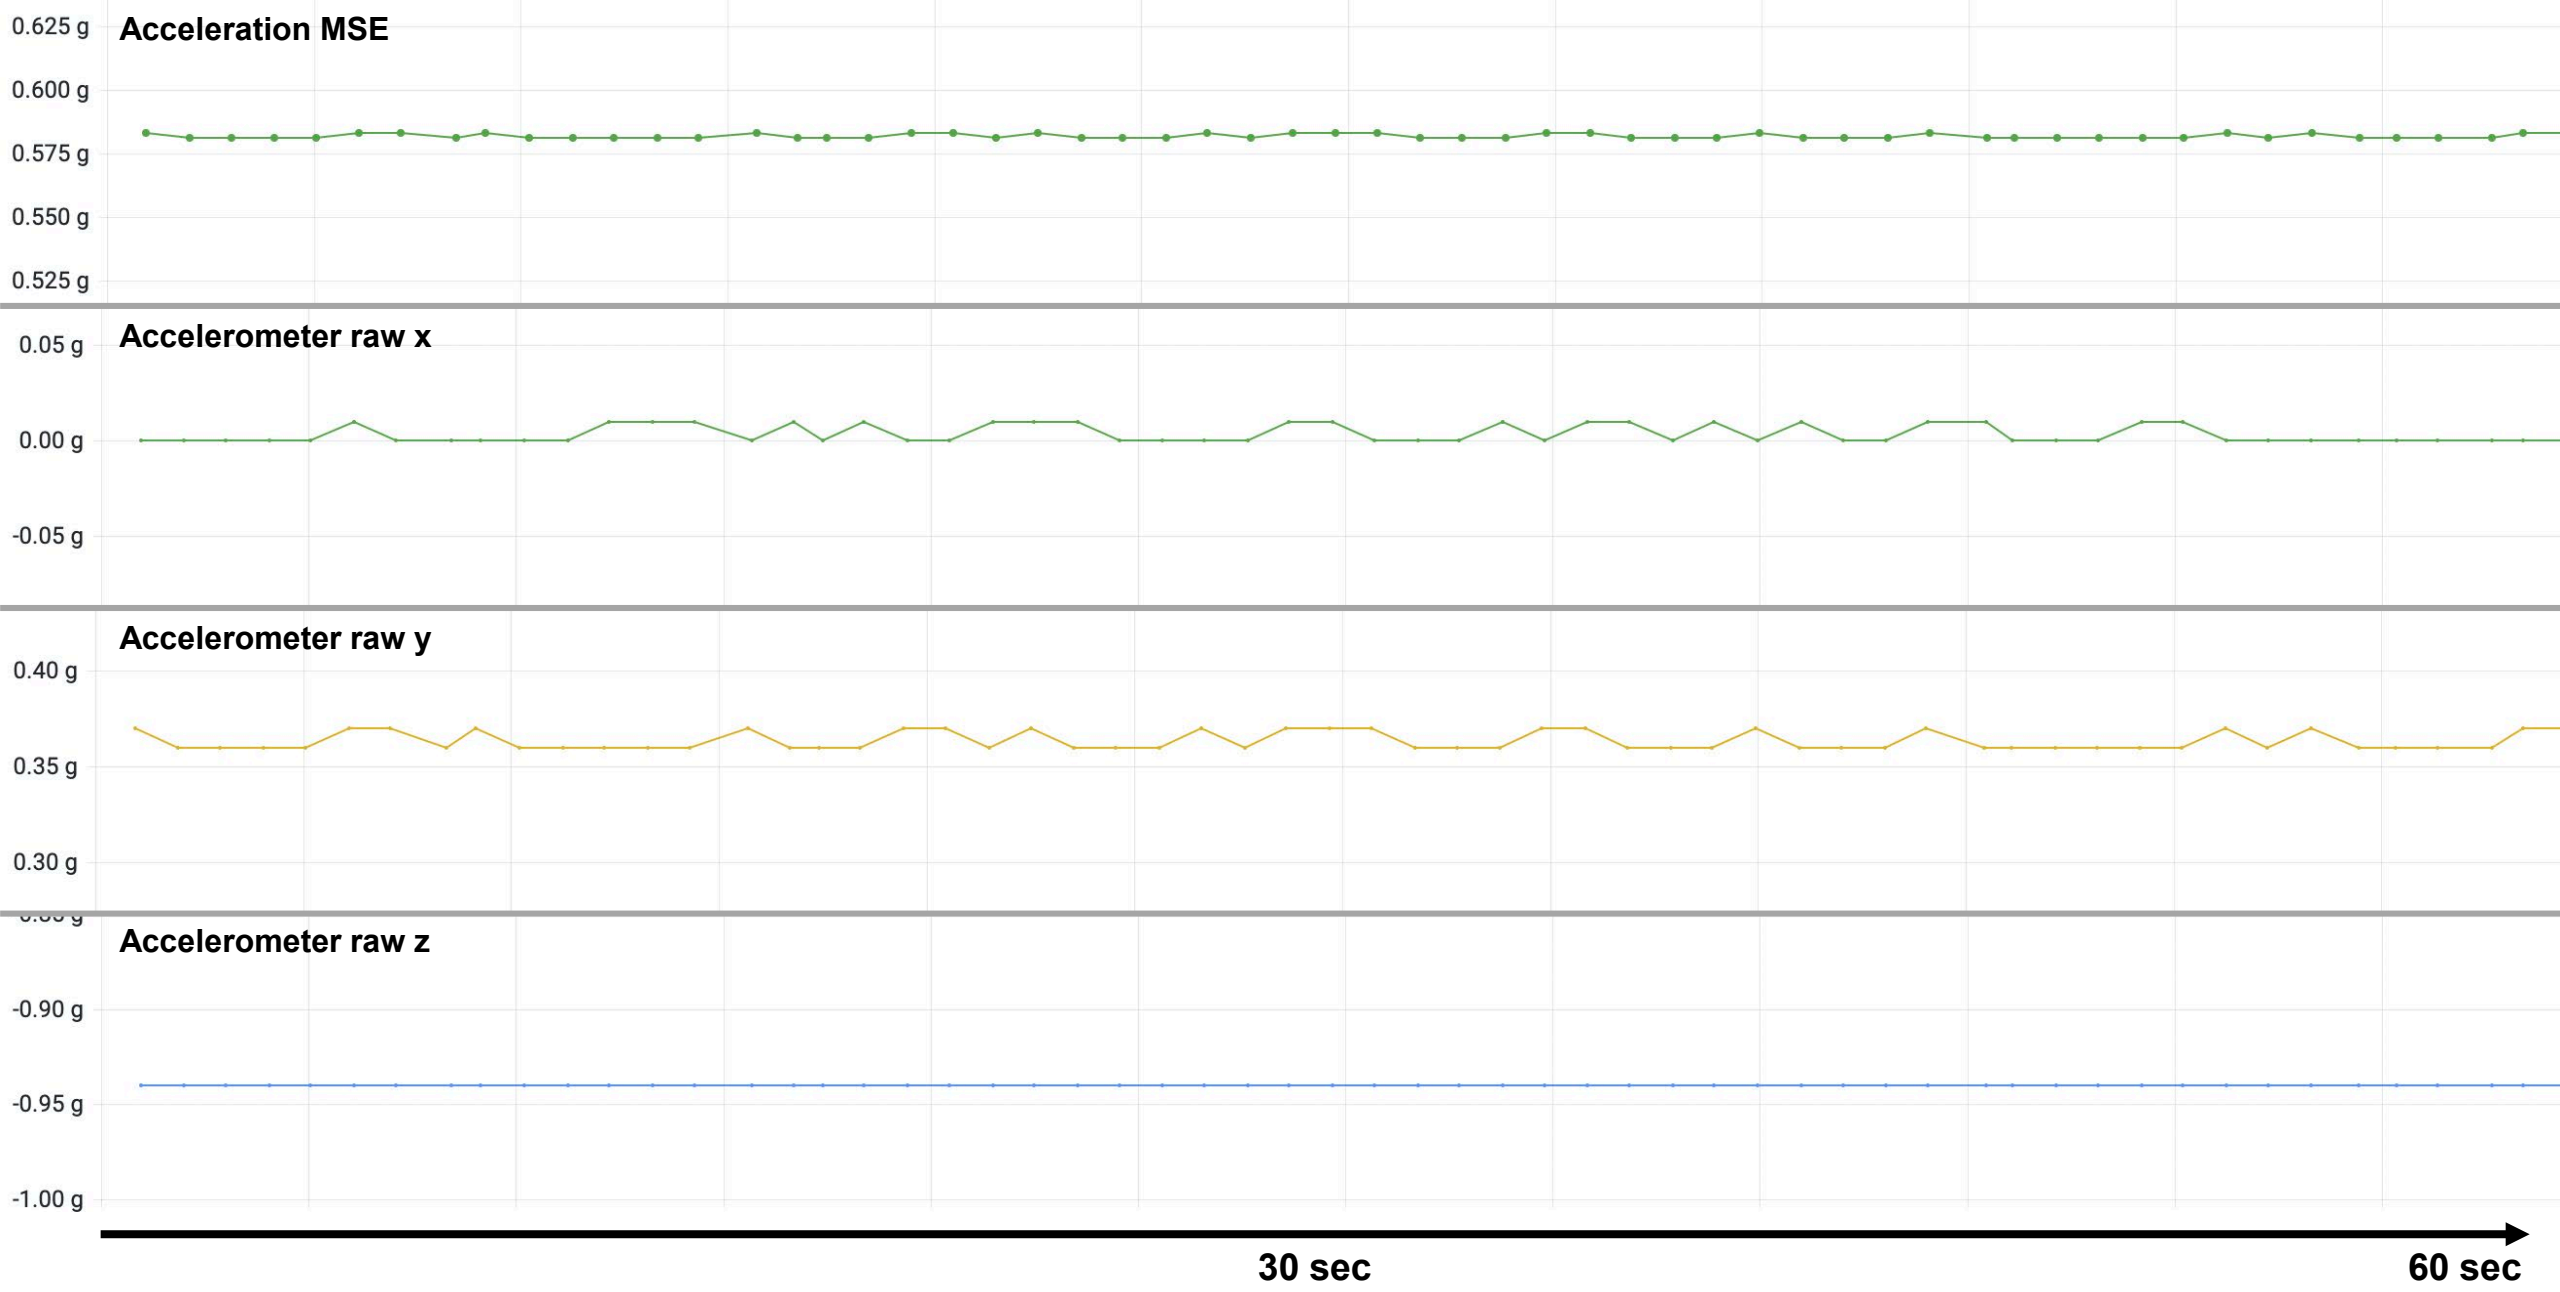

## Scene 13: Subject in bed attempting to leave the bed

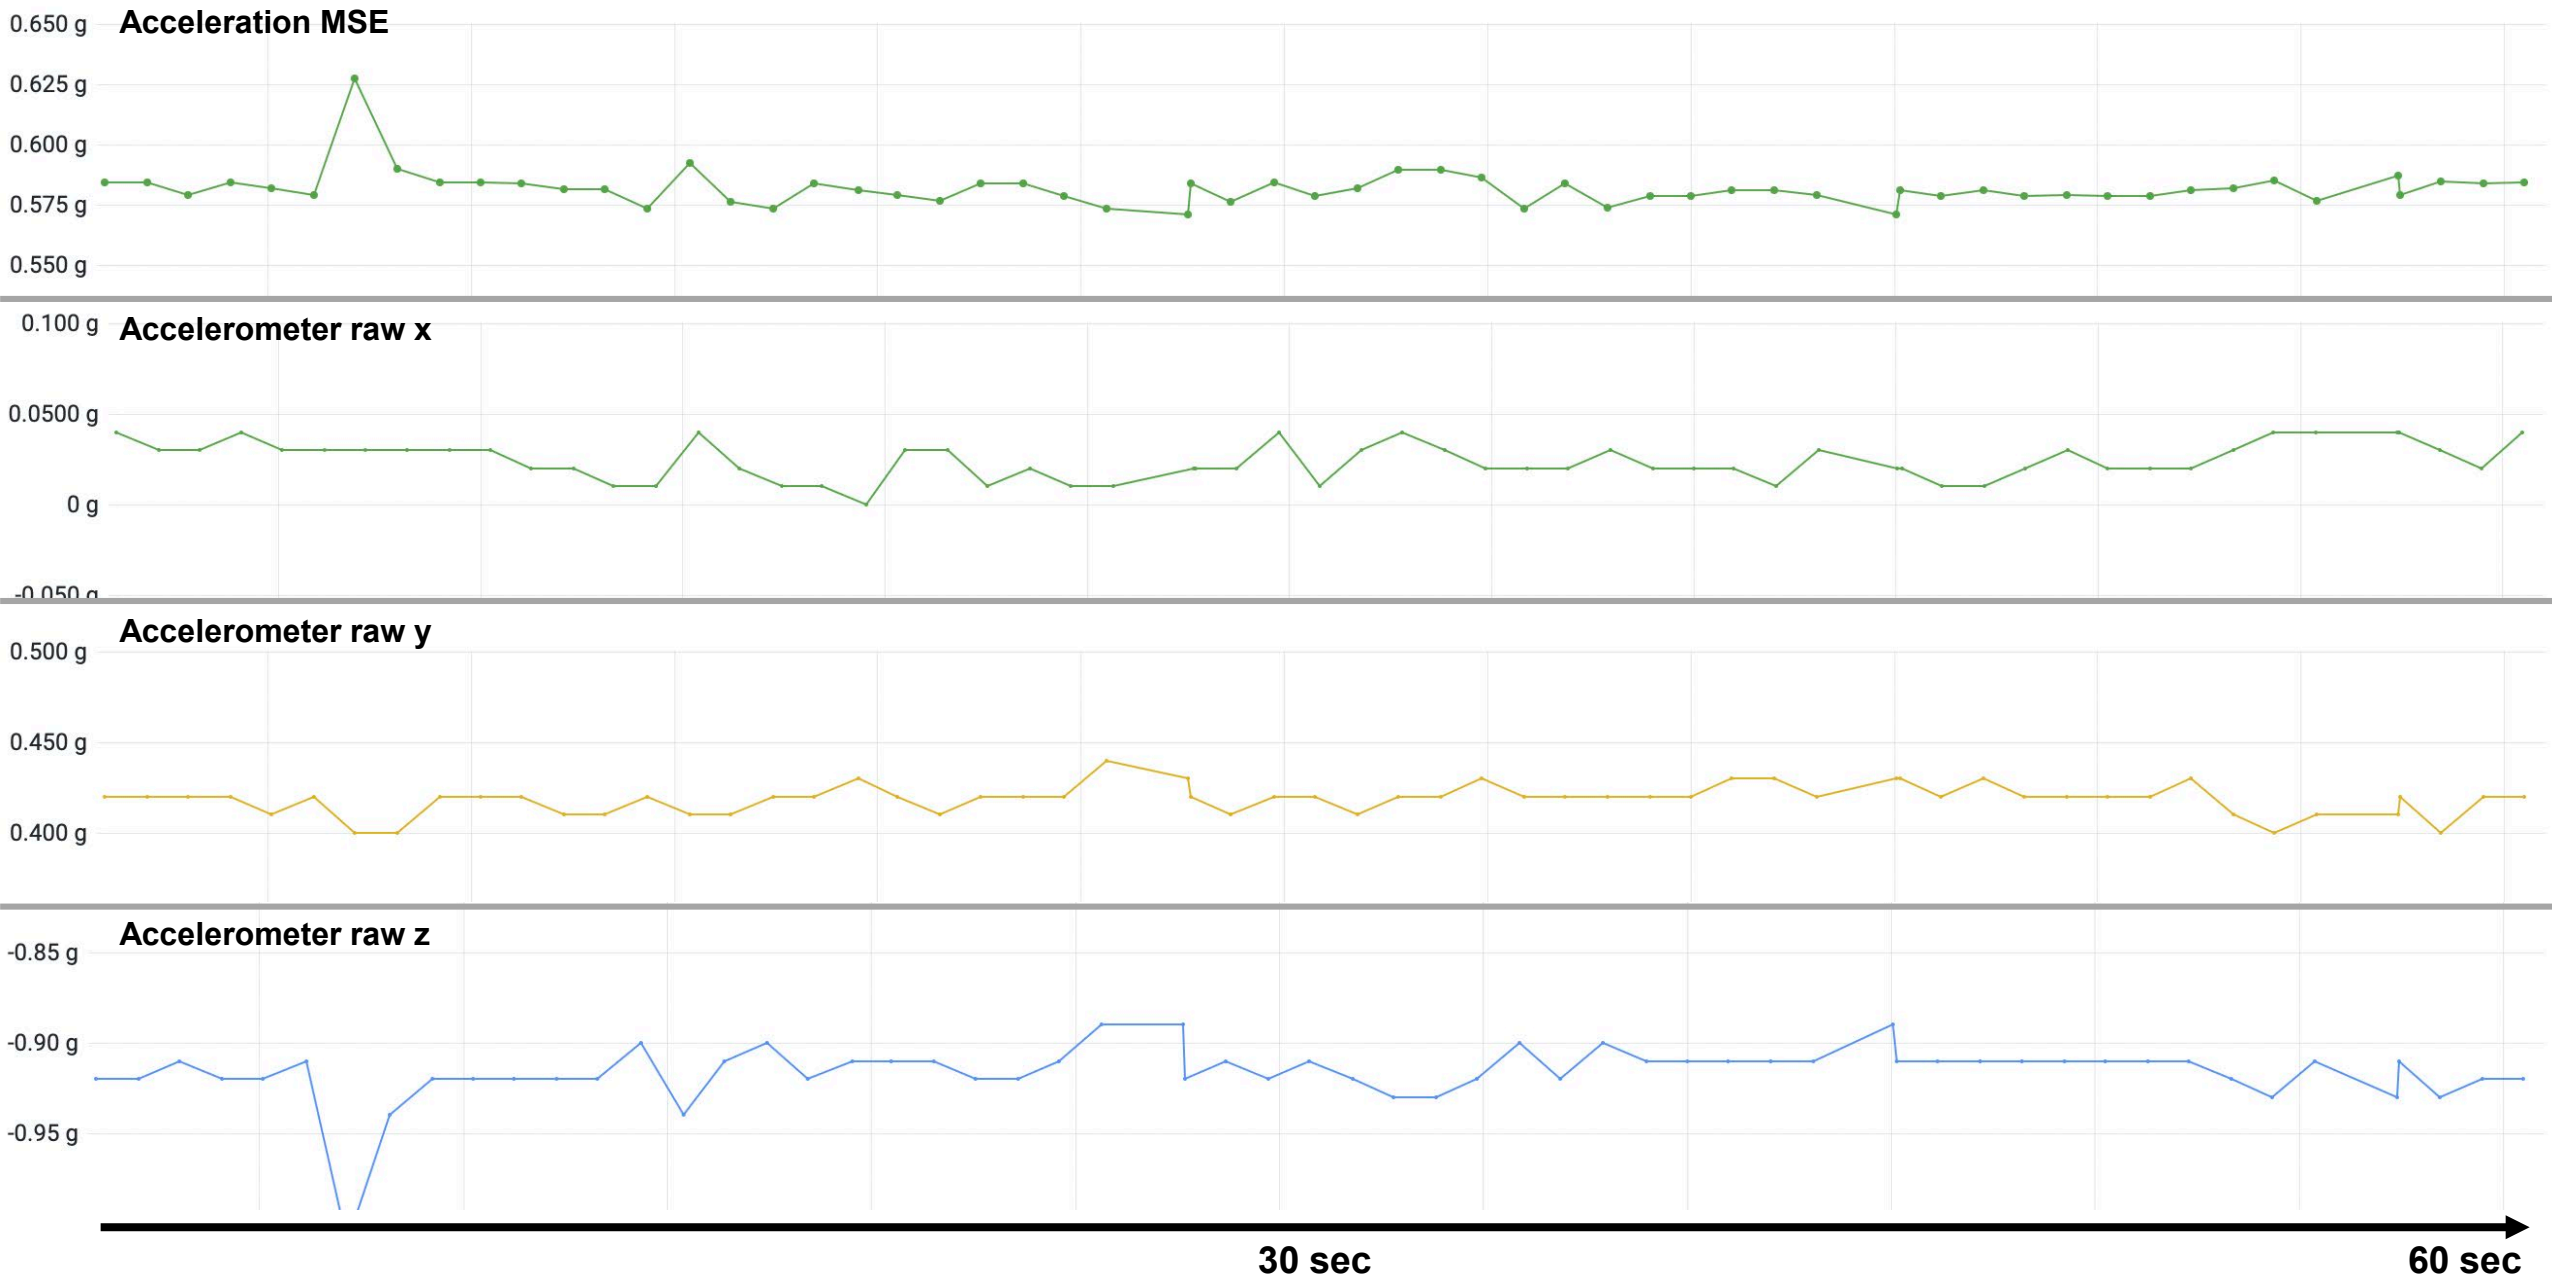

## Scene 14: Subject in bed completing bed exit (here: three documented exits)

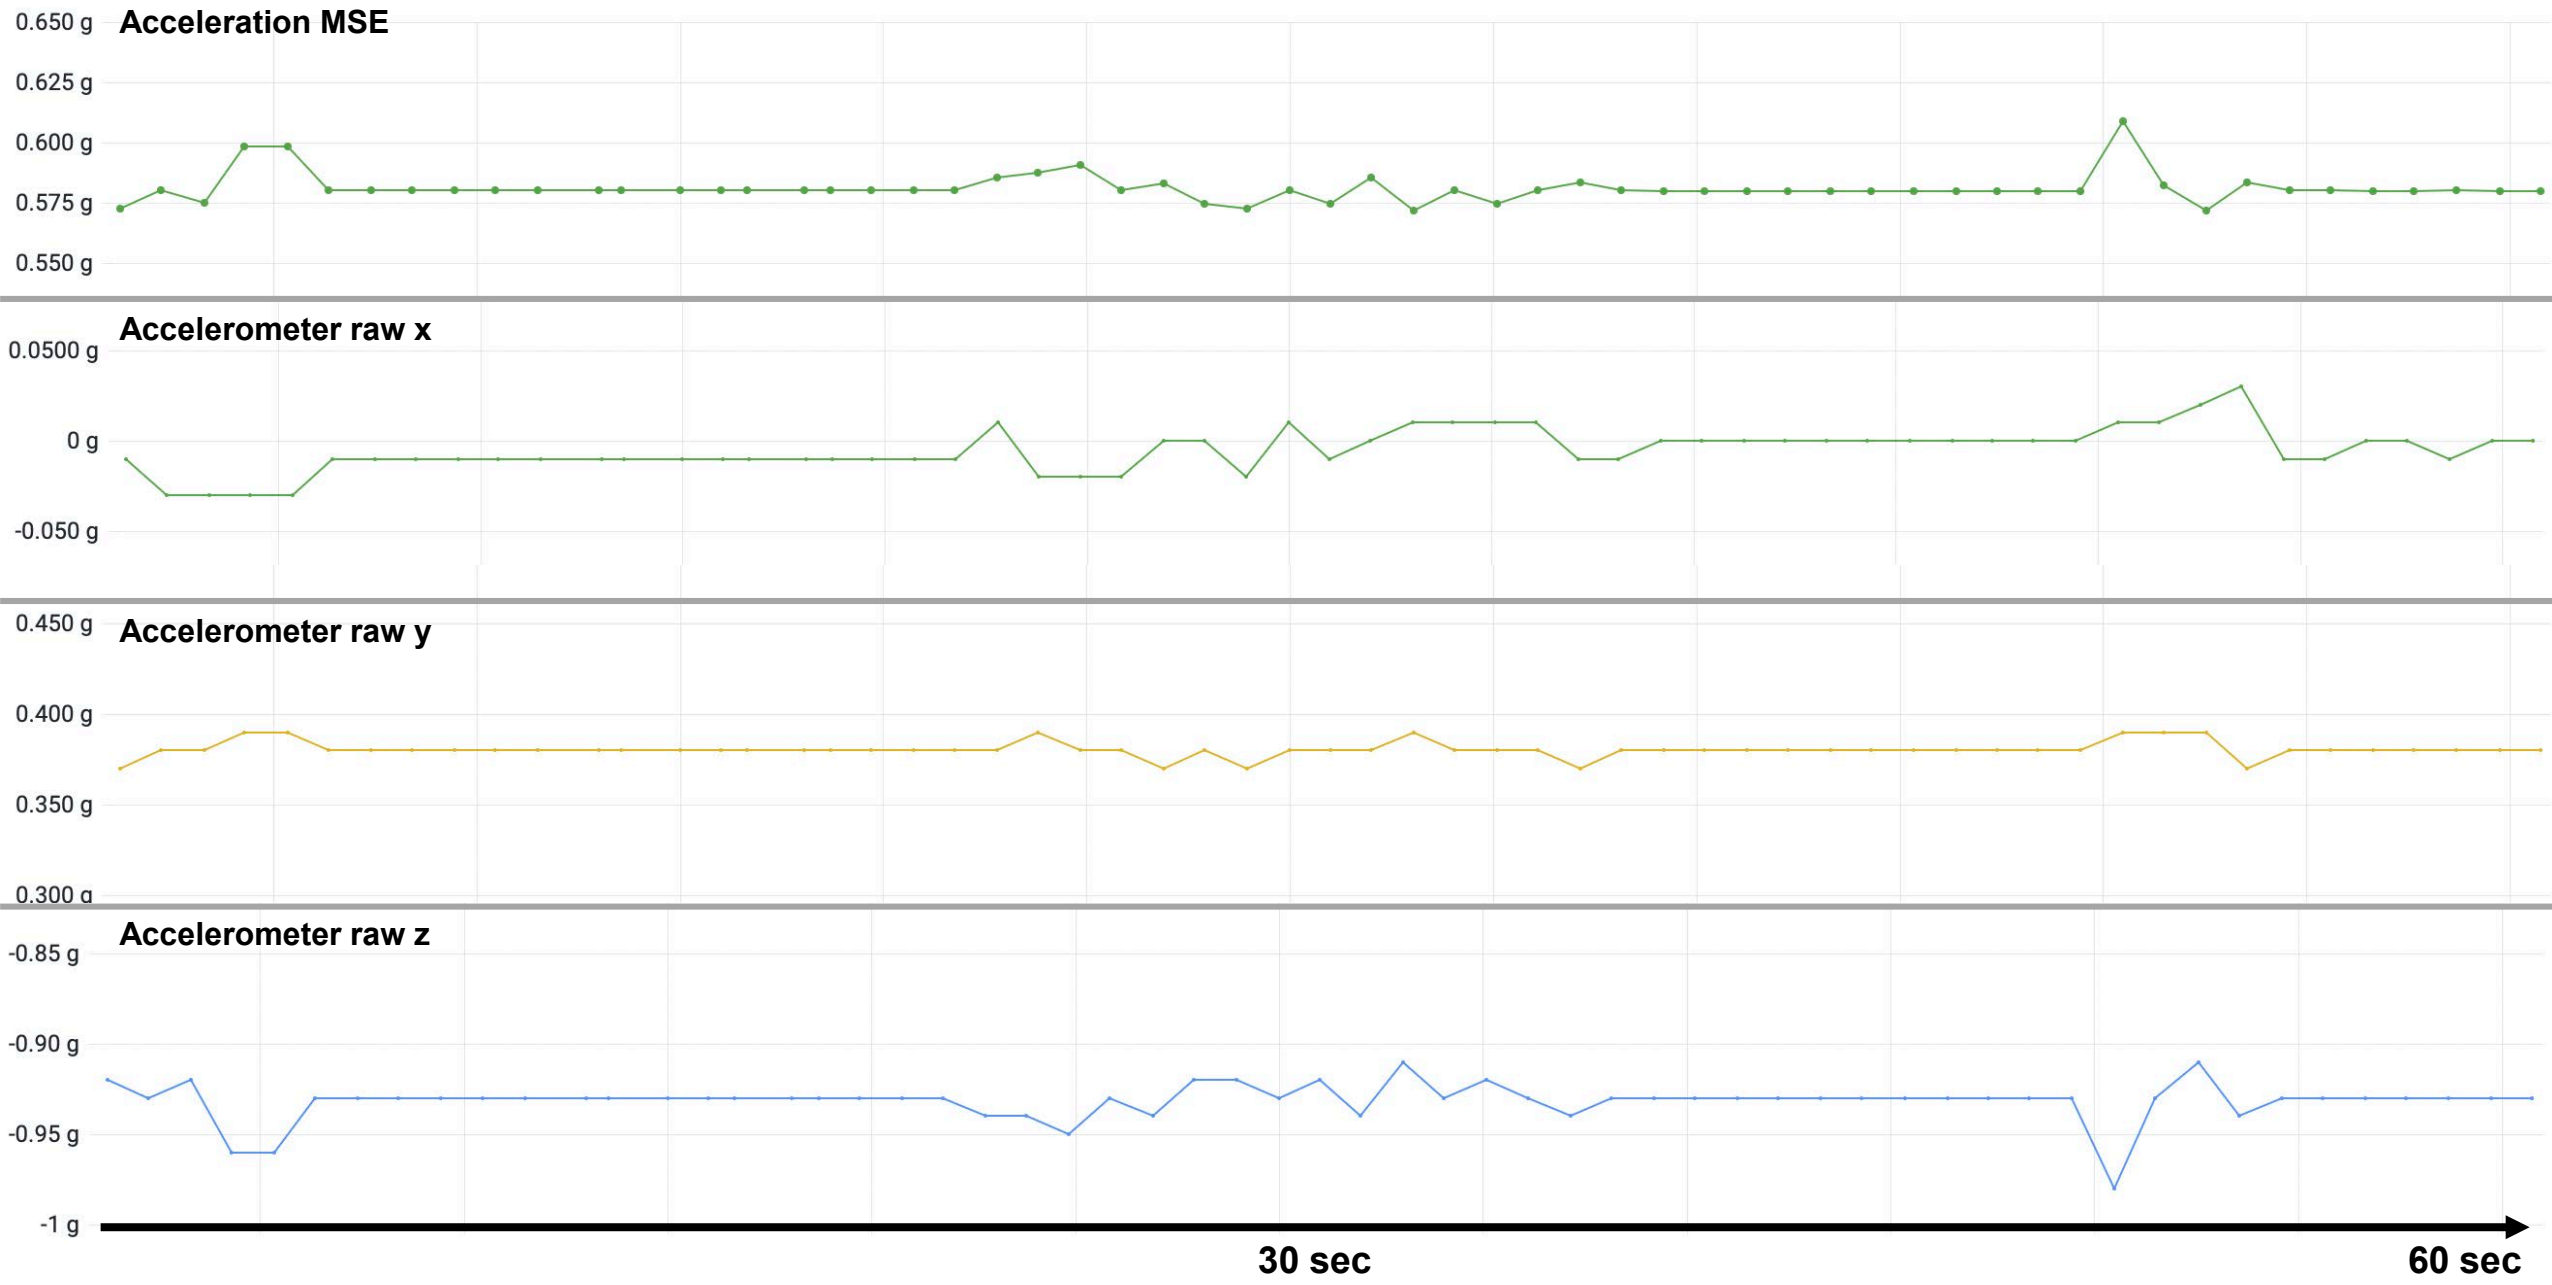

## Scene 16: Subject in bed, hitting the bed with the fist

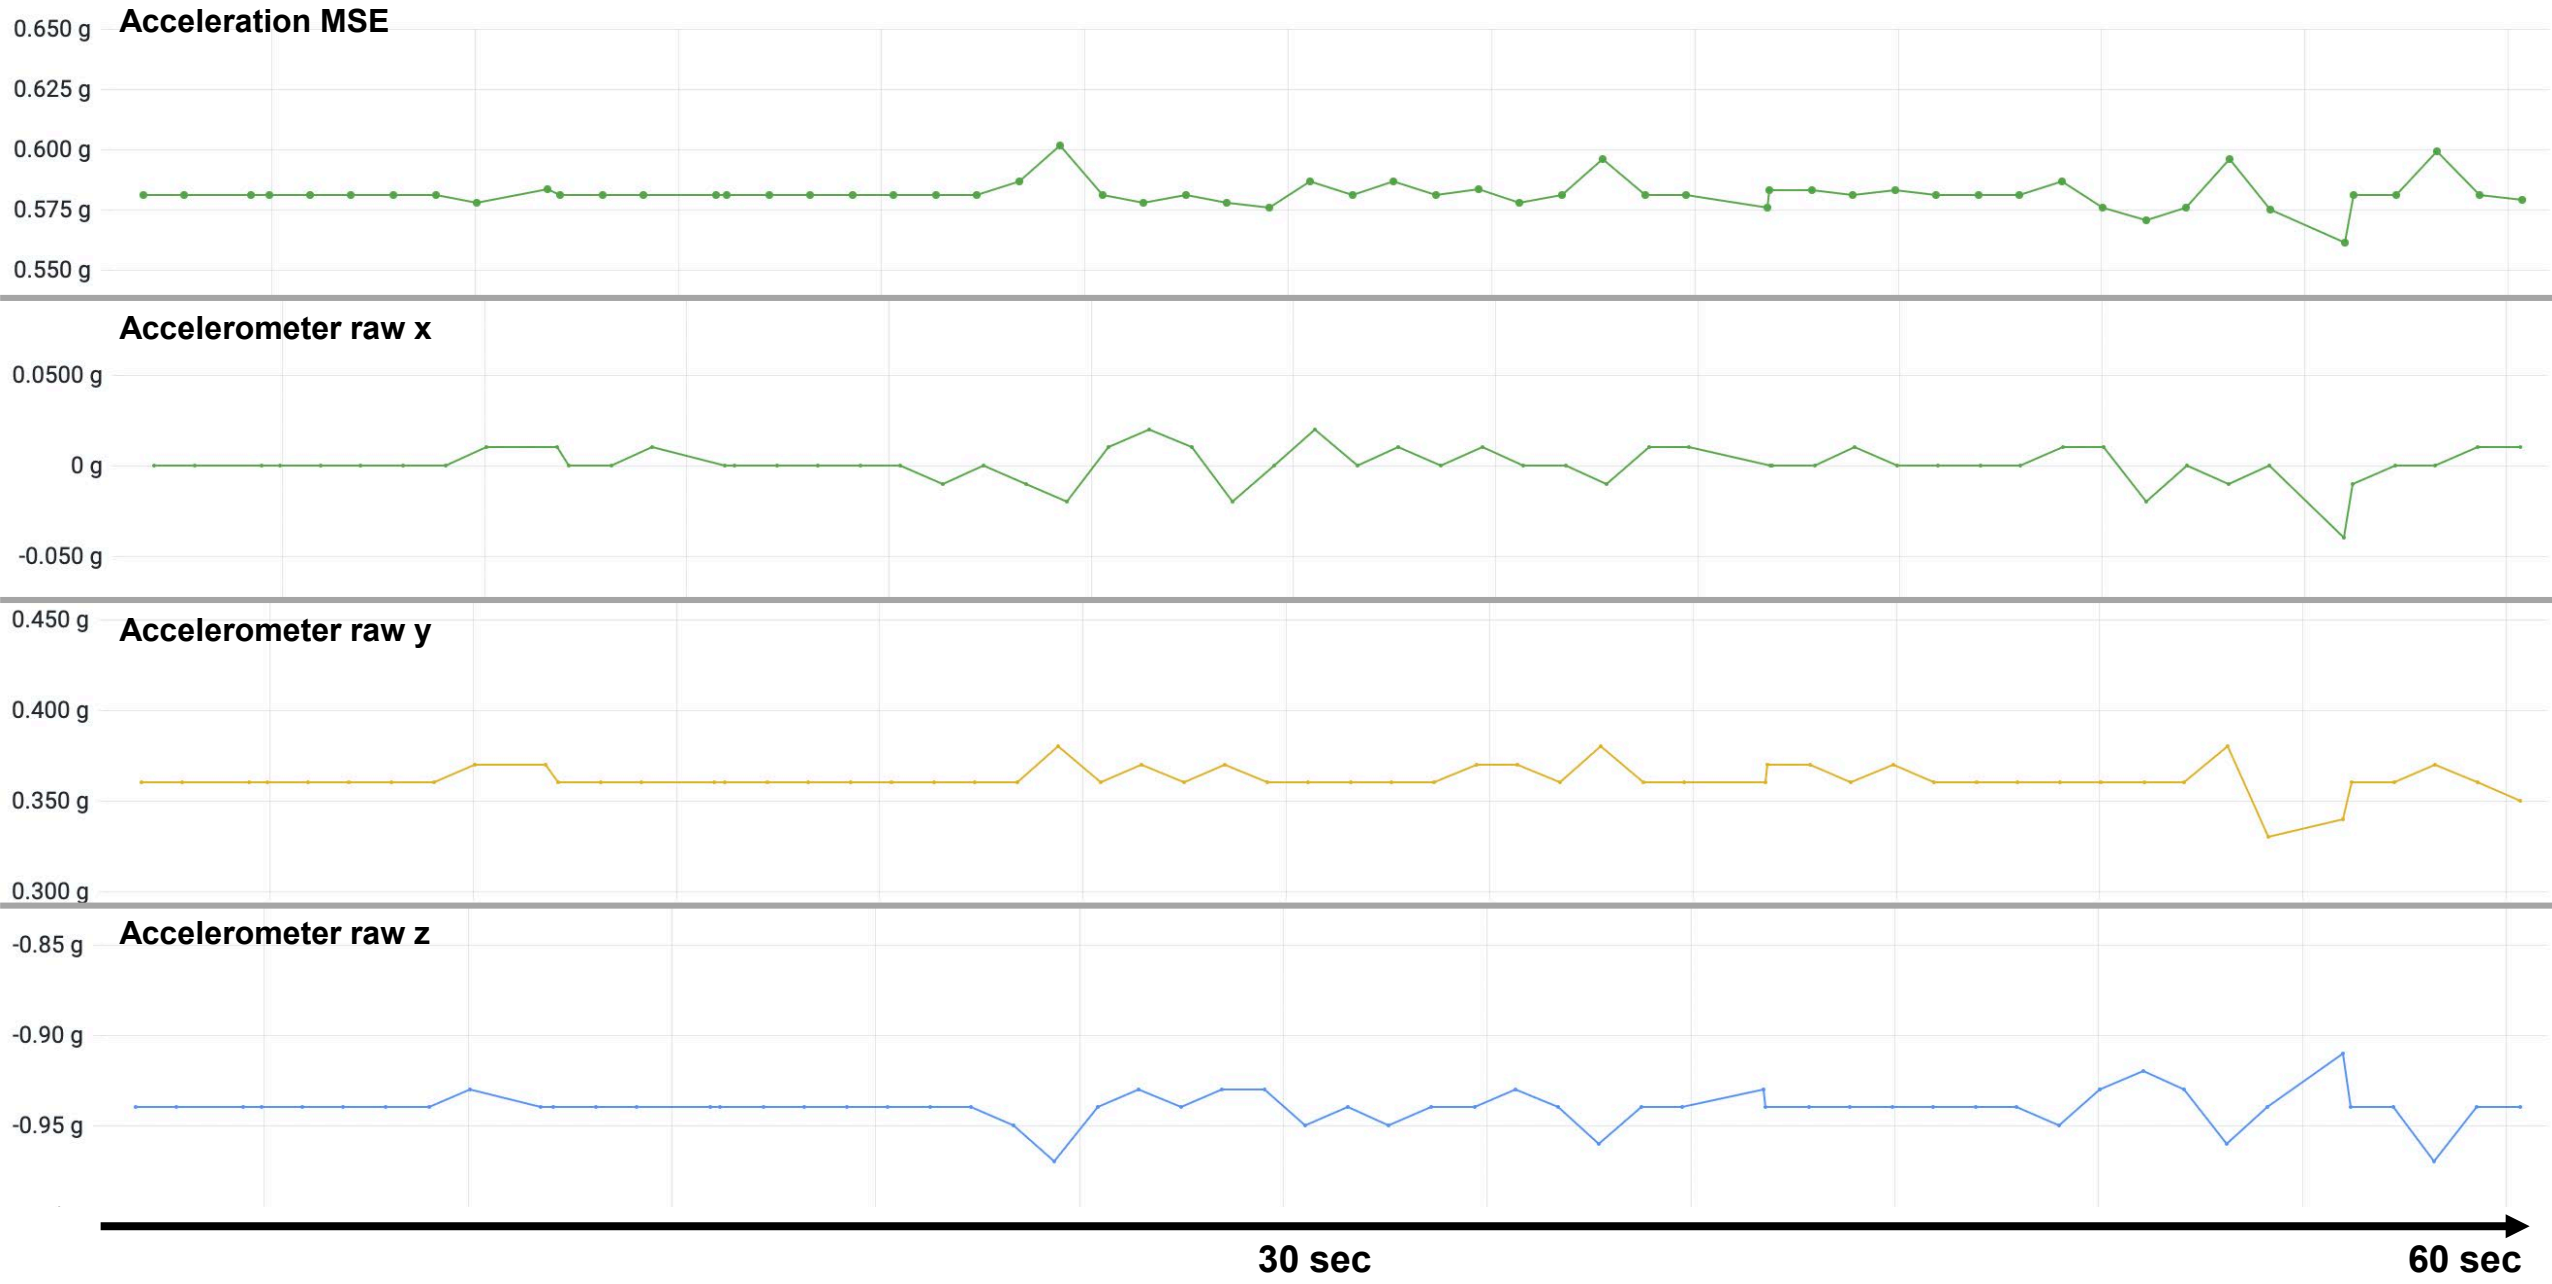

## Scene 18: Subject in bed, exhibiting tremor

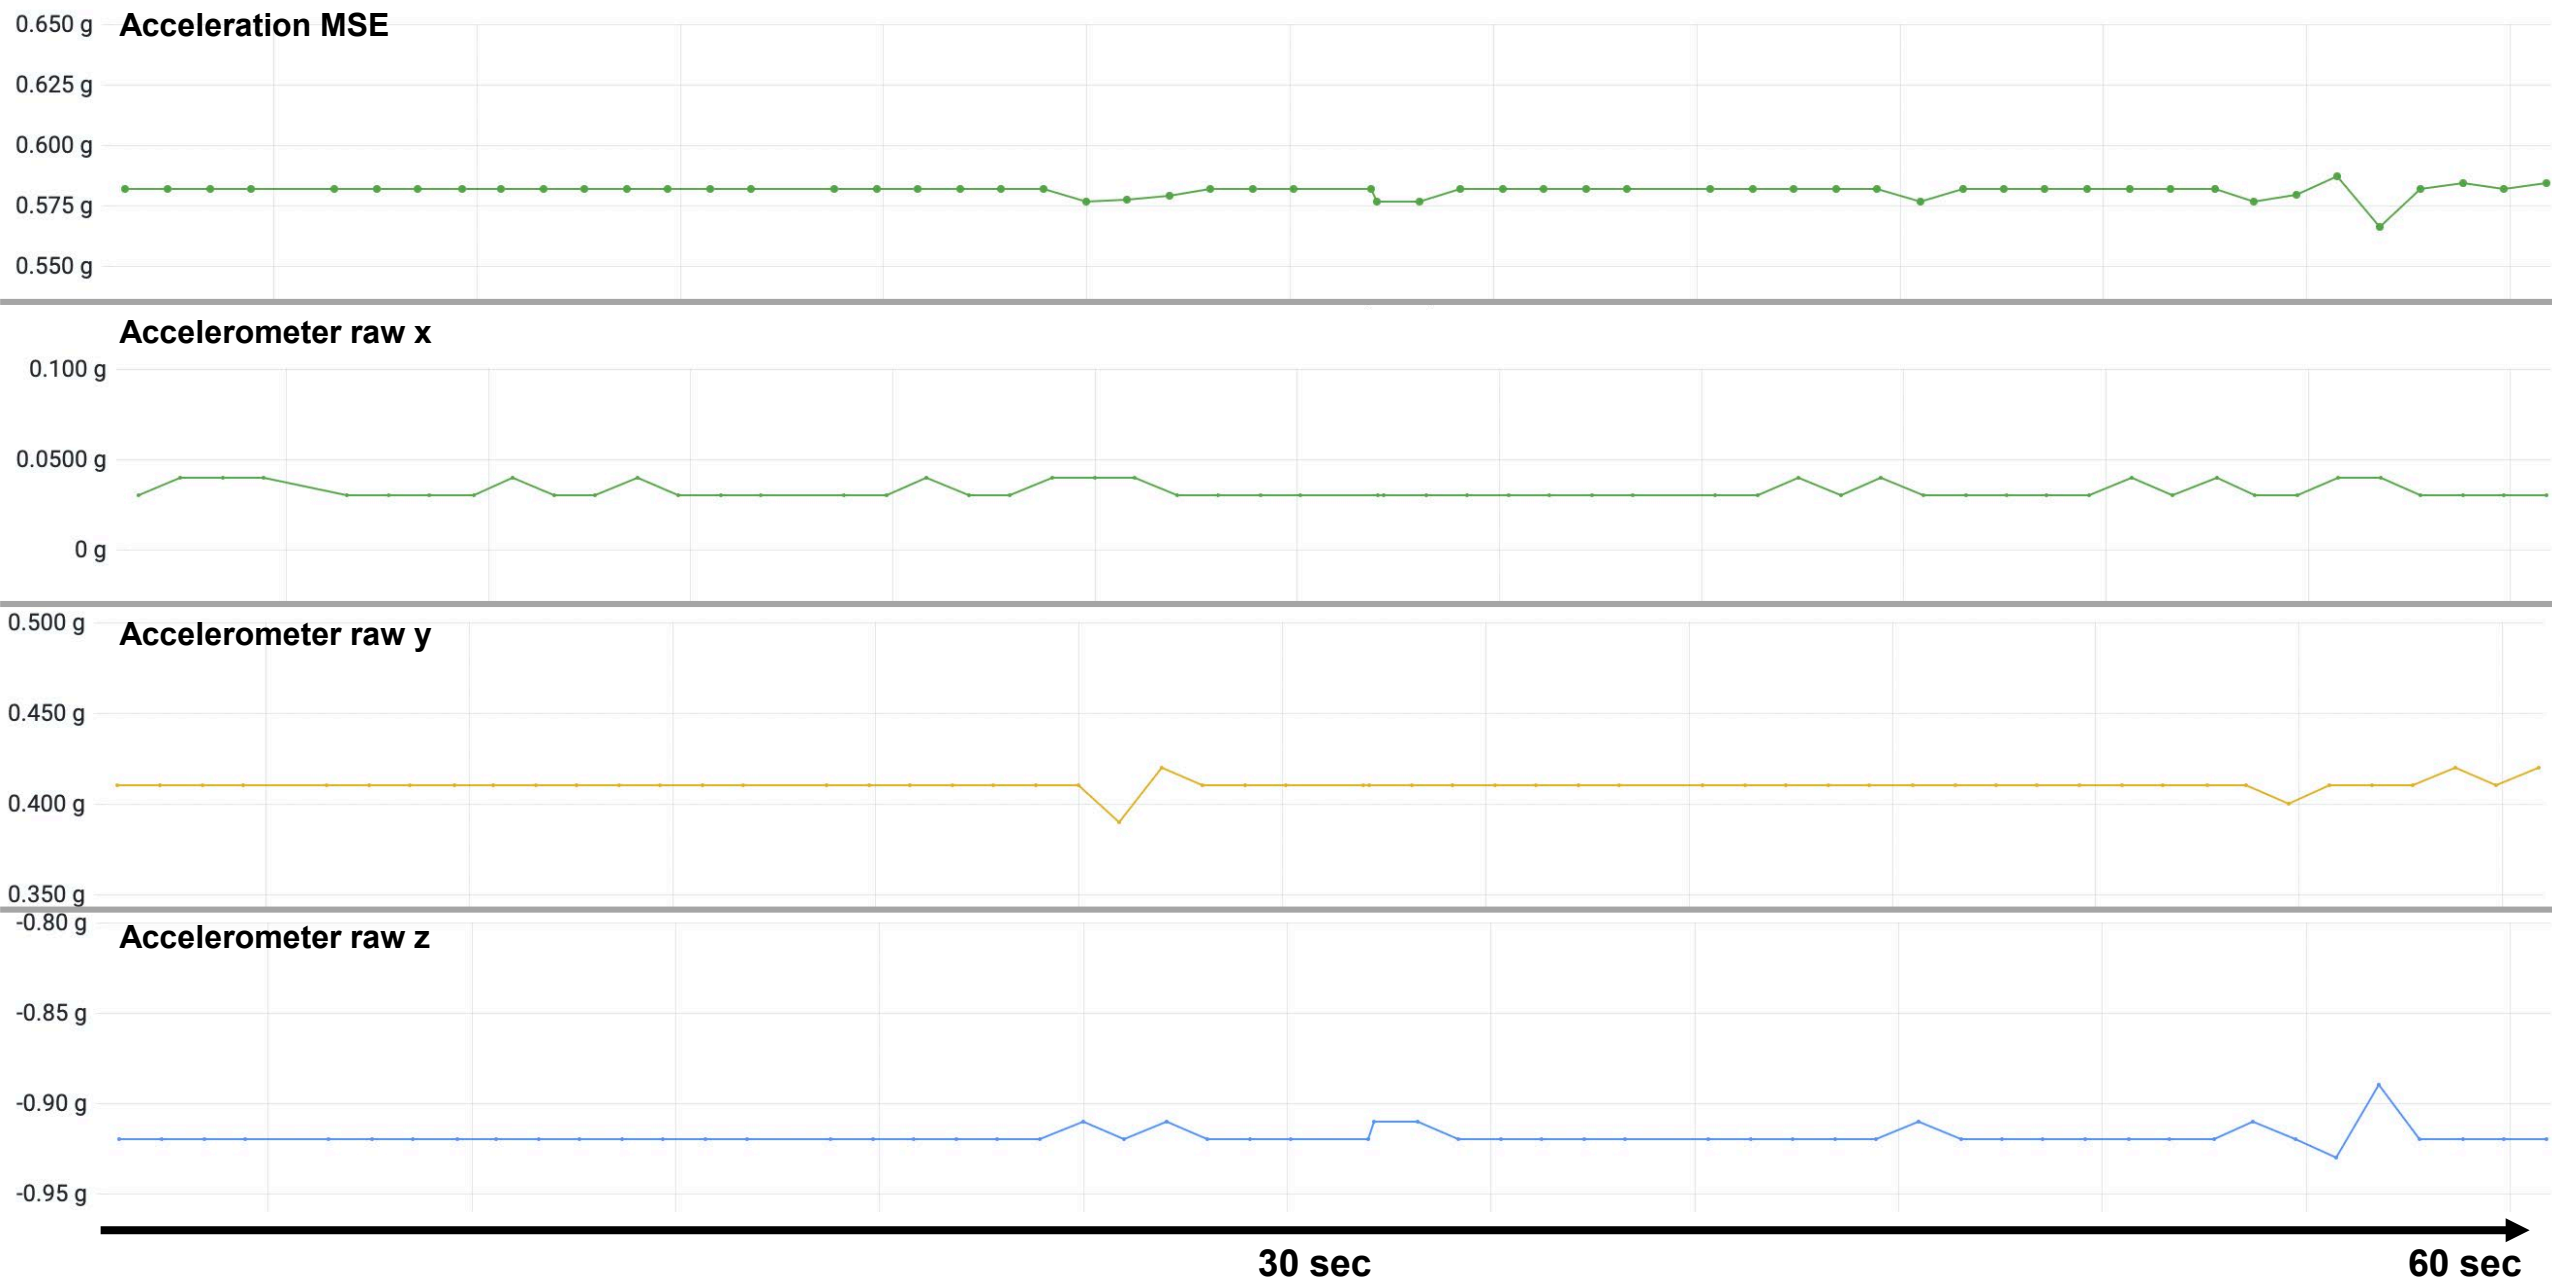

## Scene 19: Joker scene – (here: cycling movements)

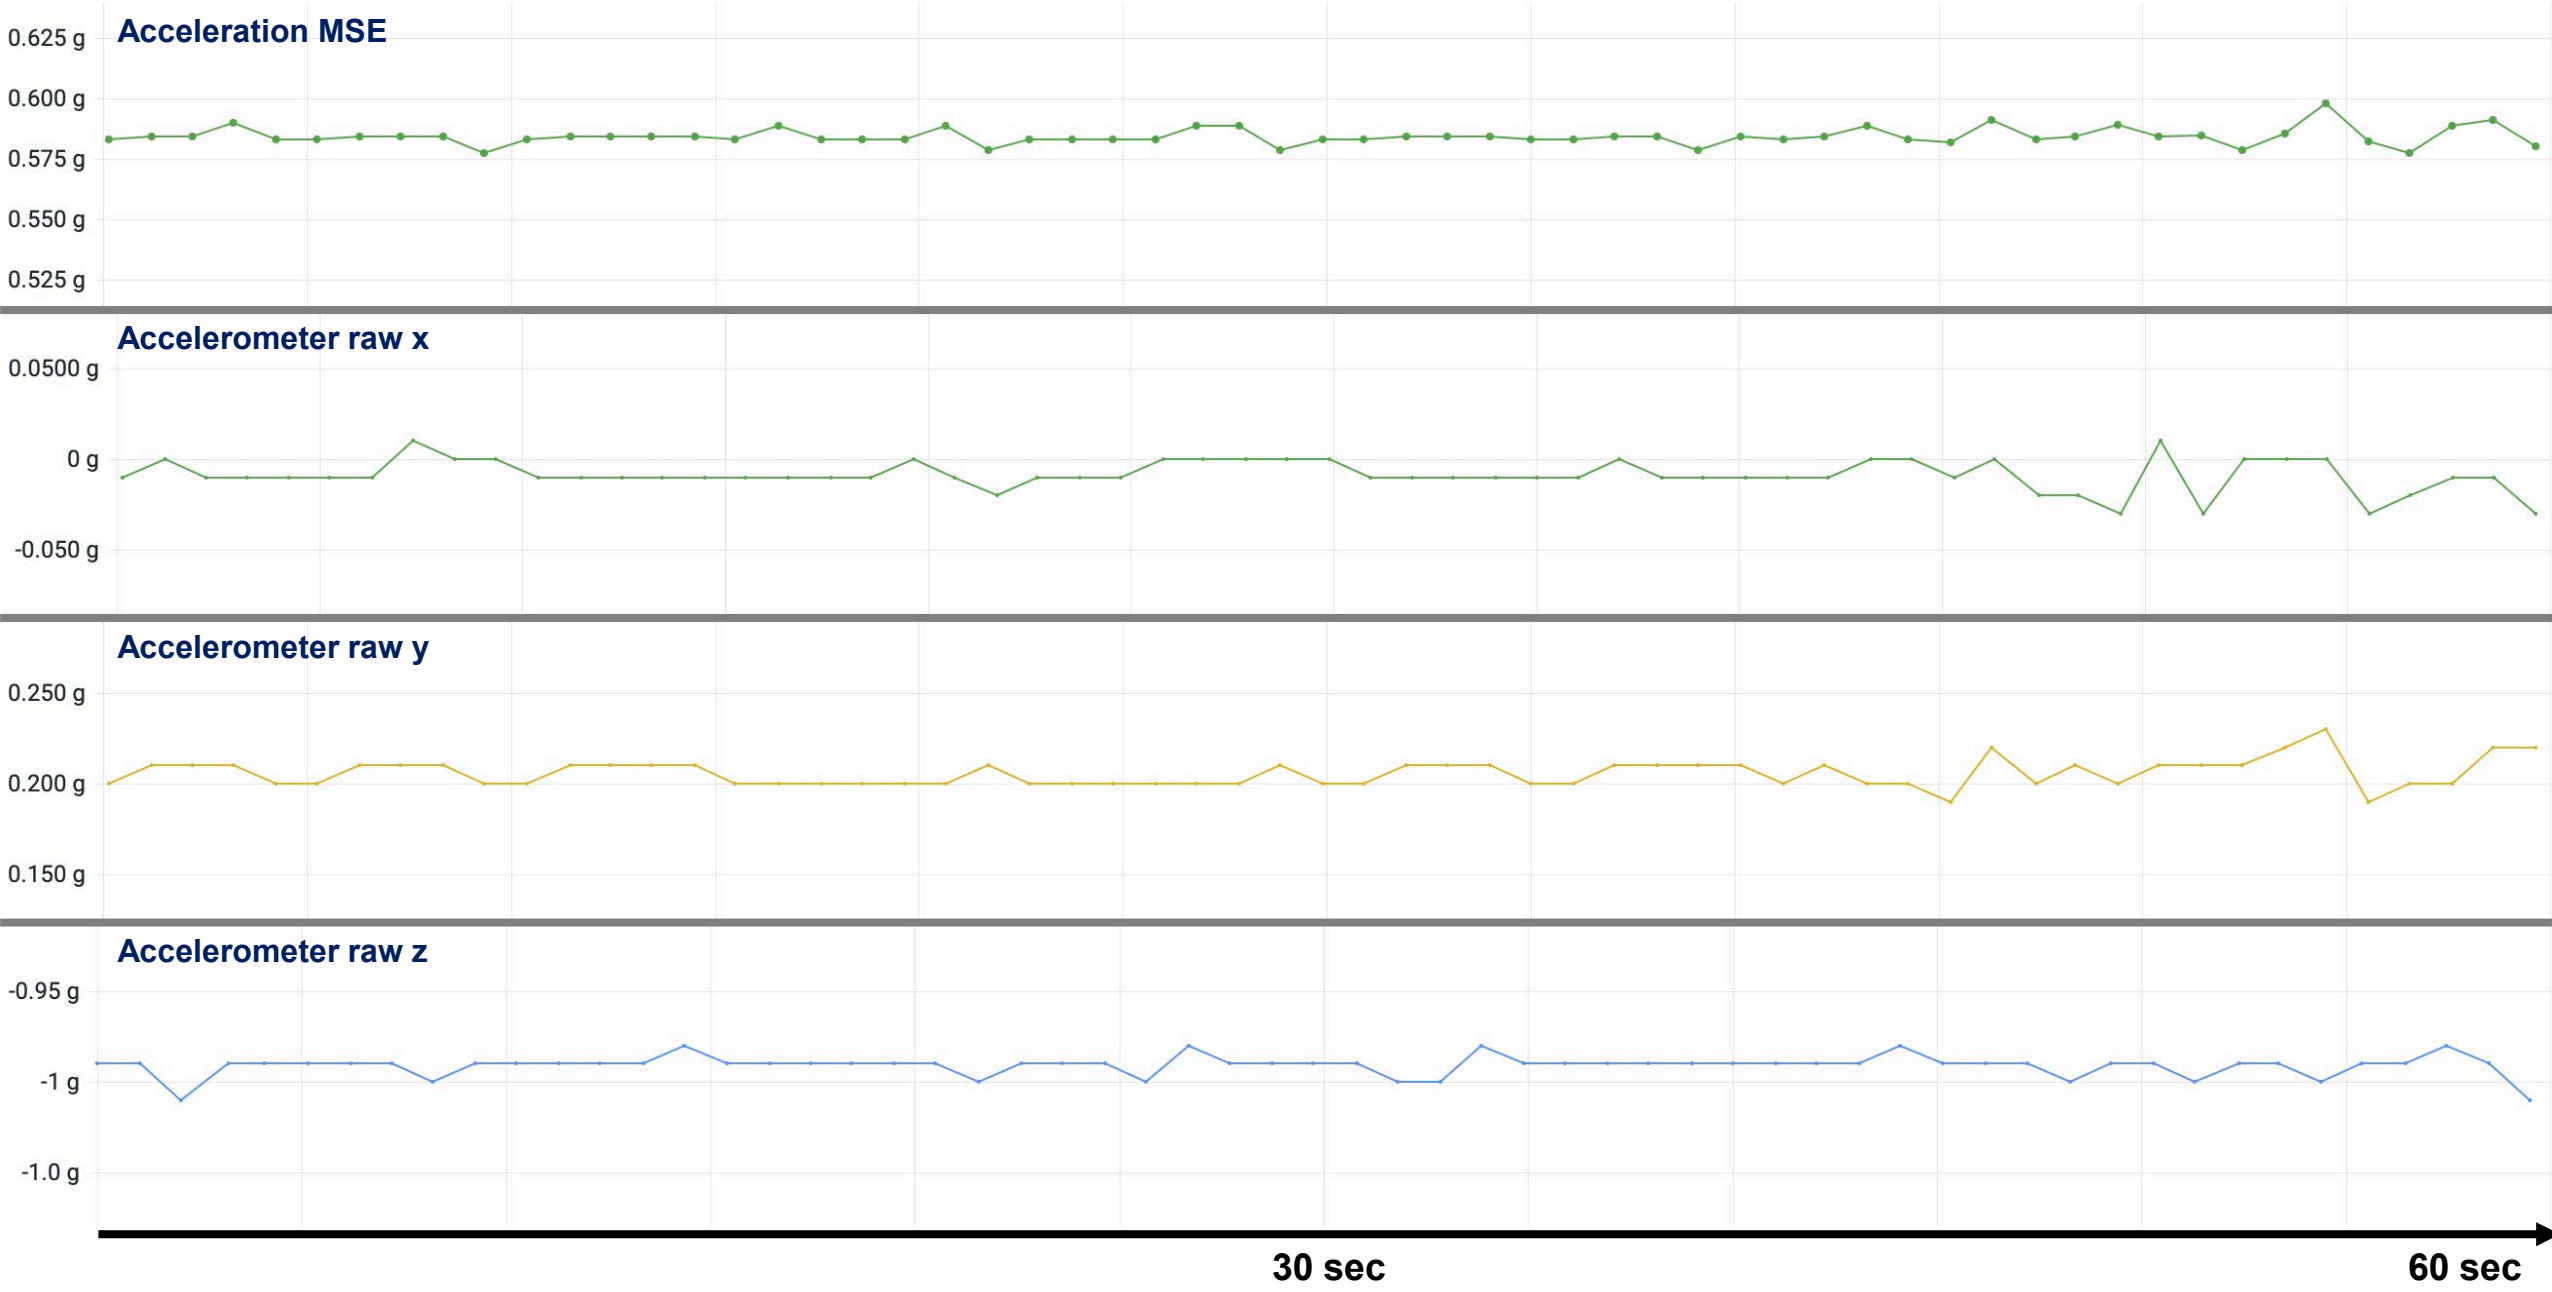



Scene 20: Subject in bed, lying relaxed

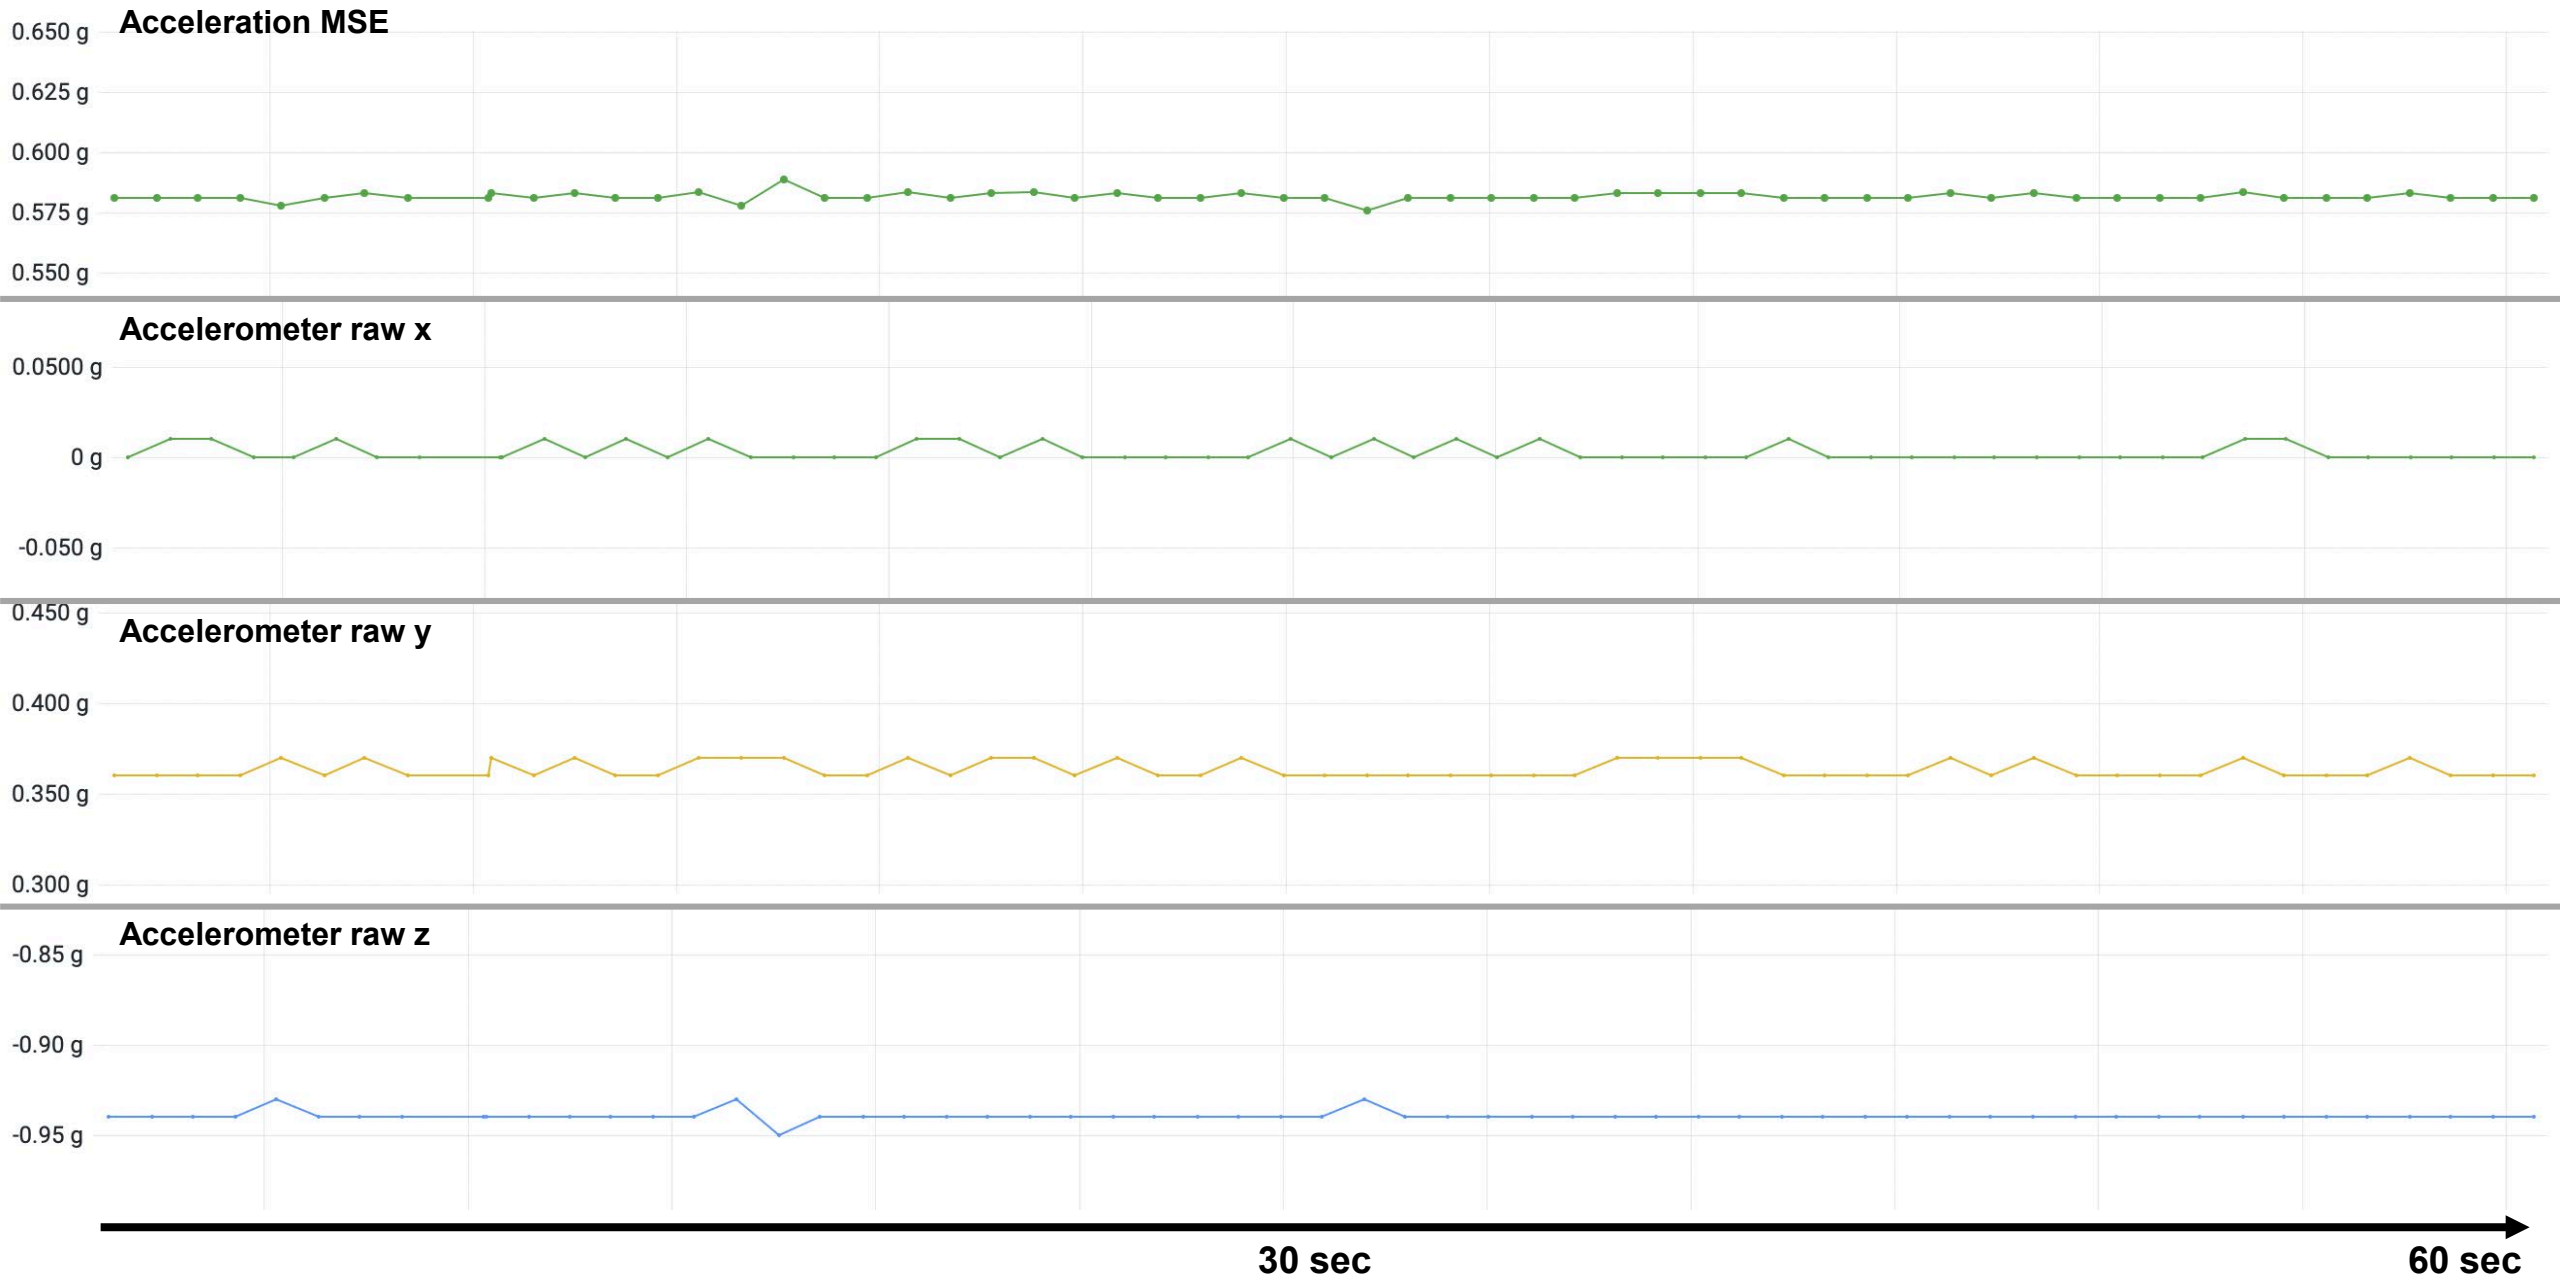

# Scene 21: Subject lying in bed motionless, vibrating mobile phone

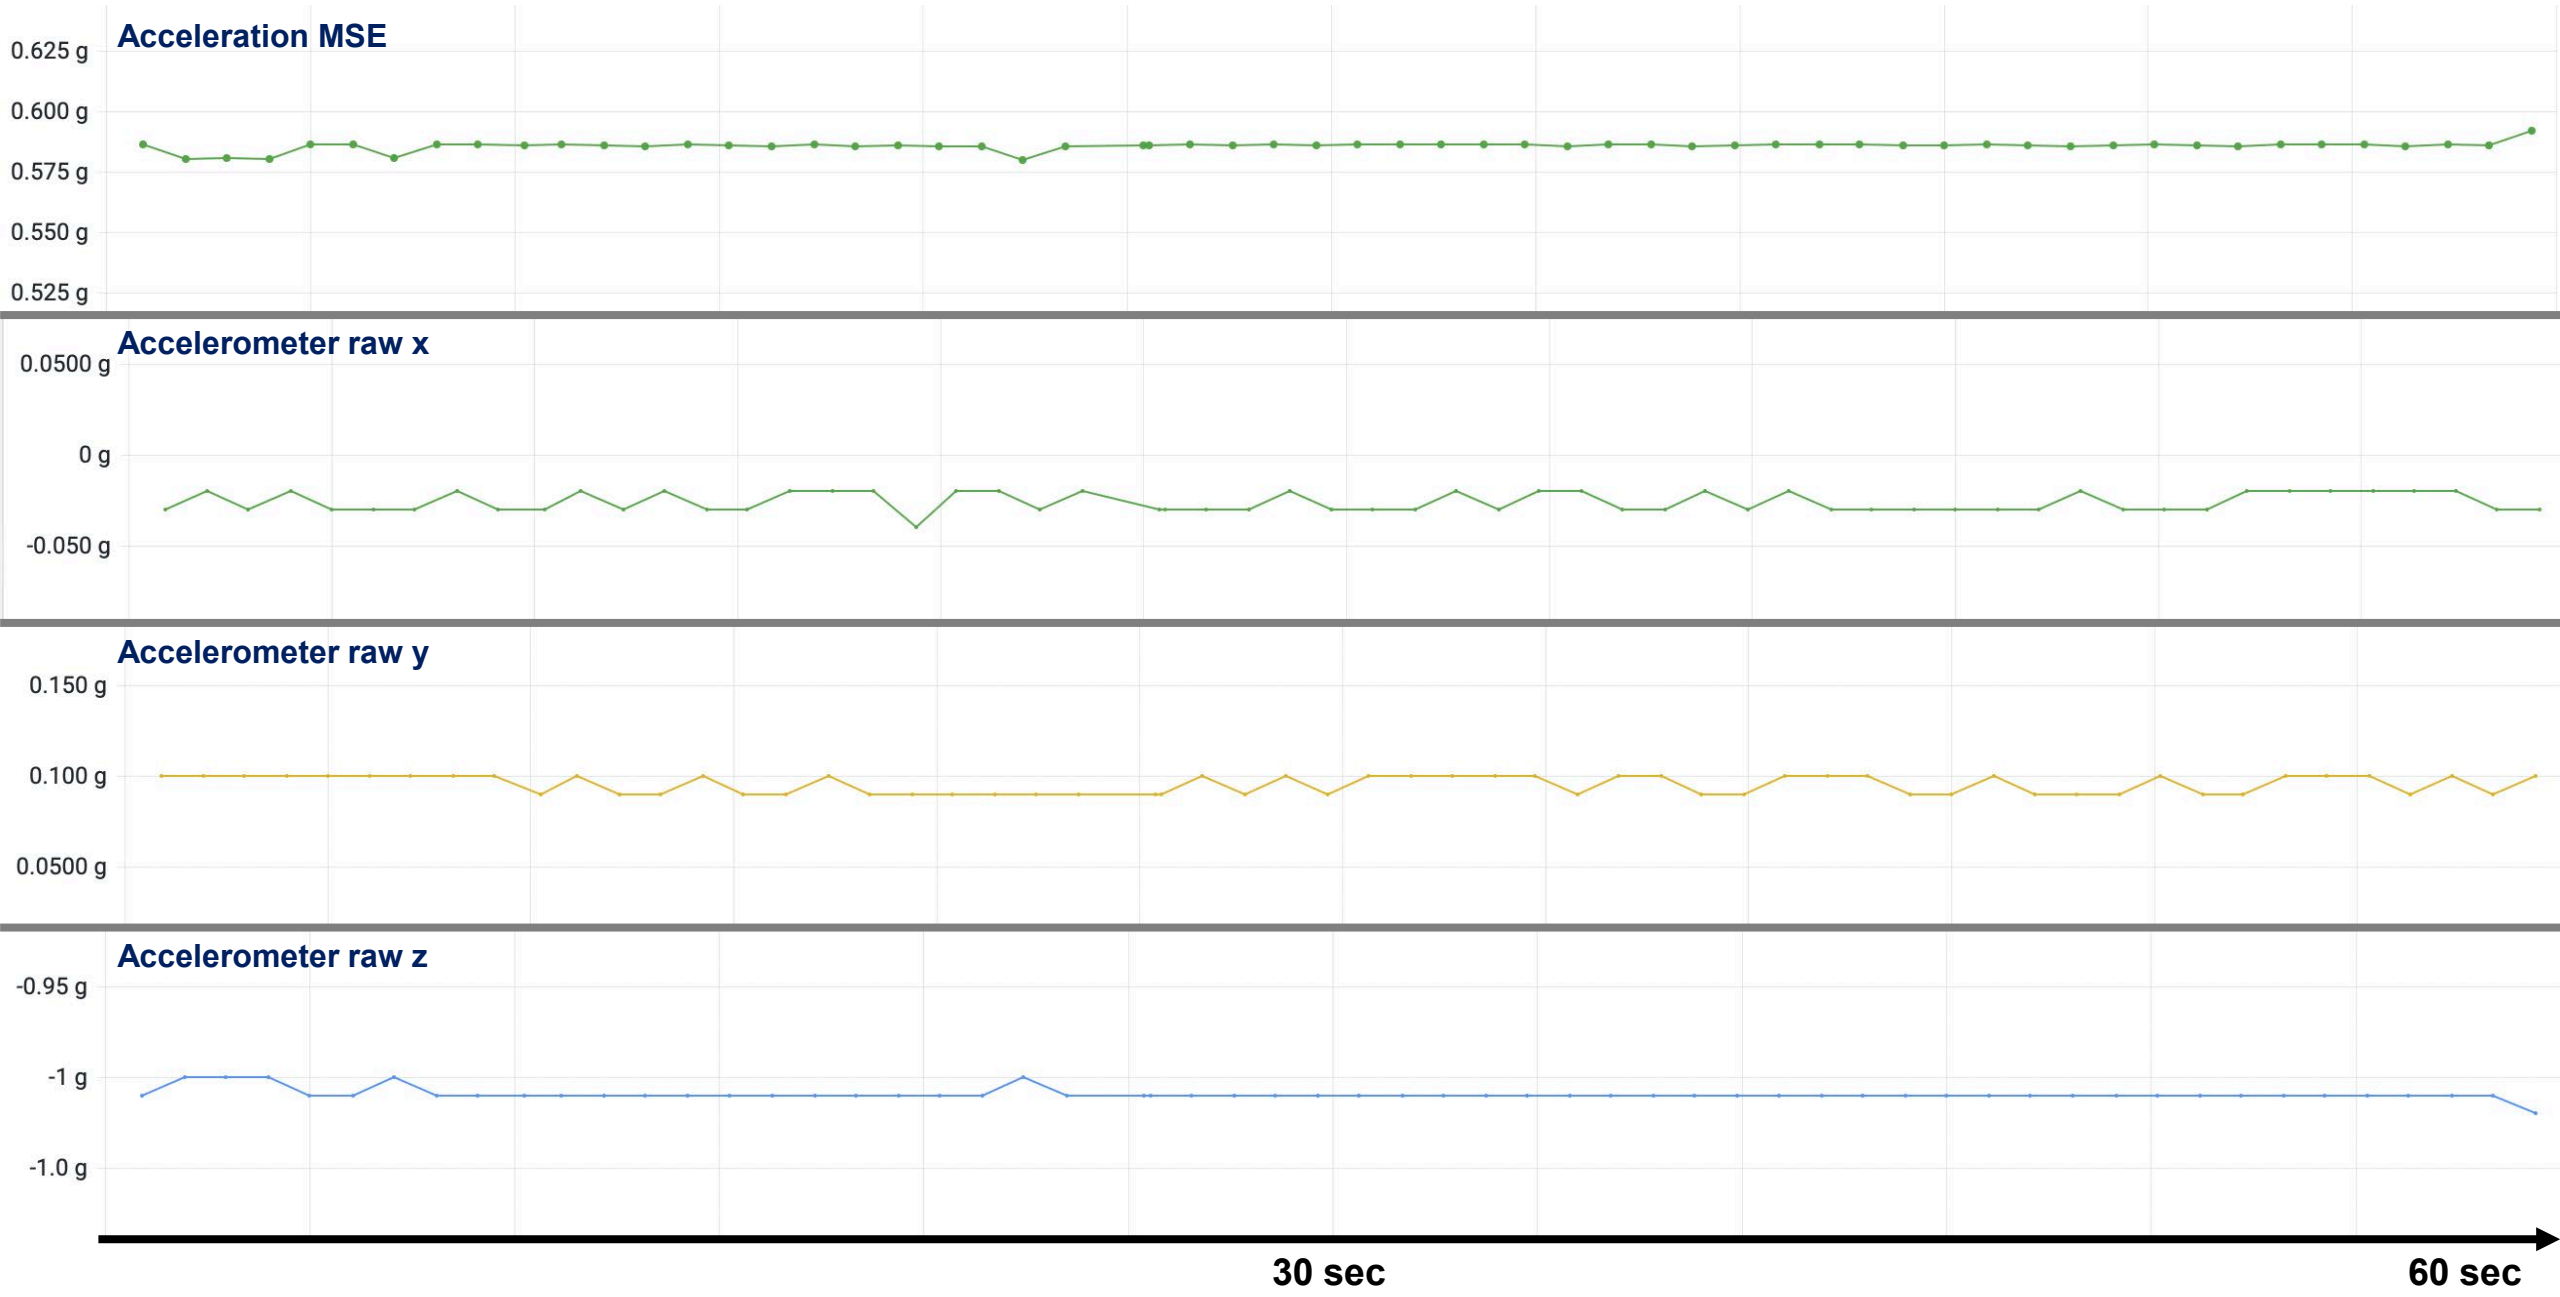

## Scene 22: Bed empty, vibrating mobile phone

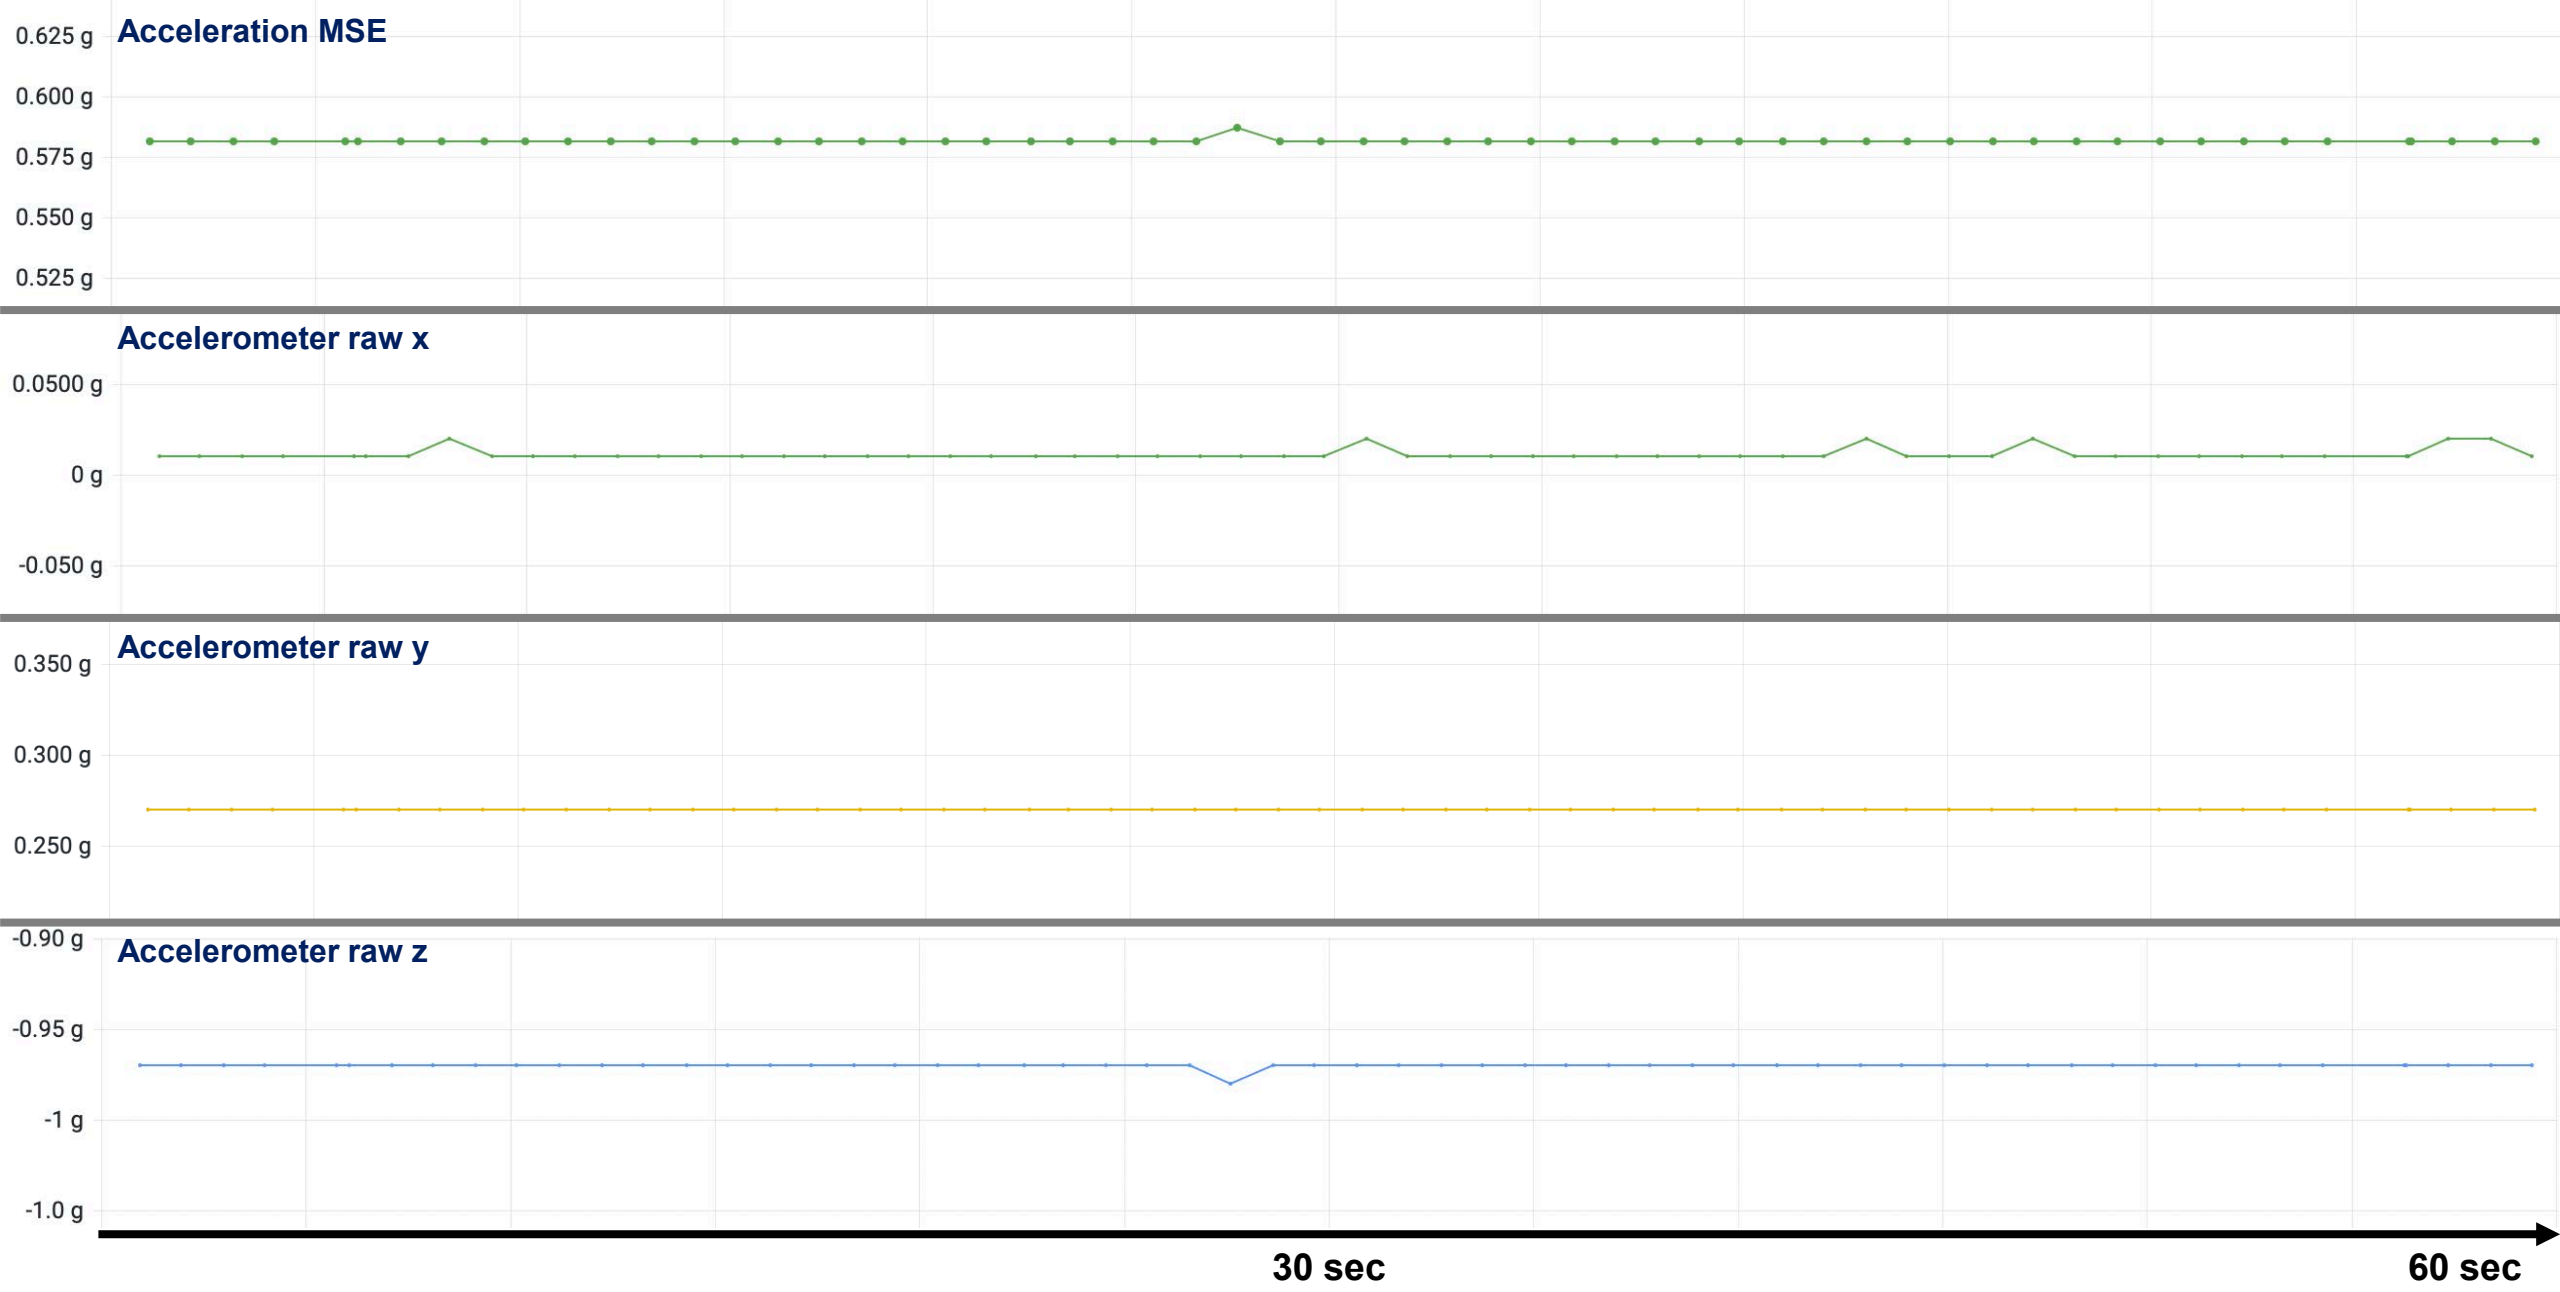

**Three exemplary Scenes resulting in false positive or false negative test results by the panel**

# Scene 1: Bed empty. Panel classification: Scene 20. Subject in bed, lying relaxed

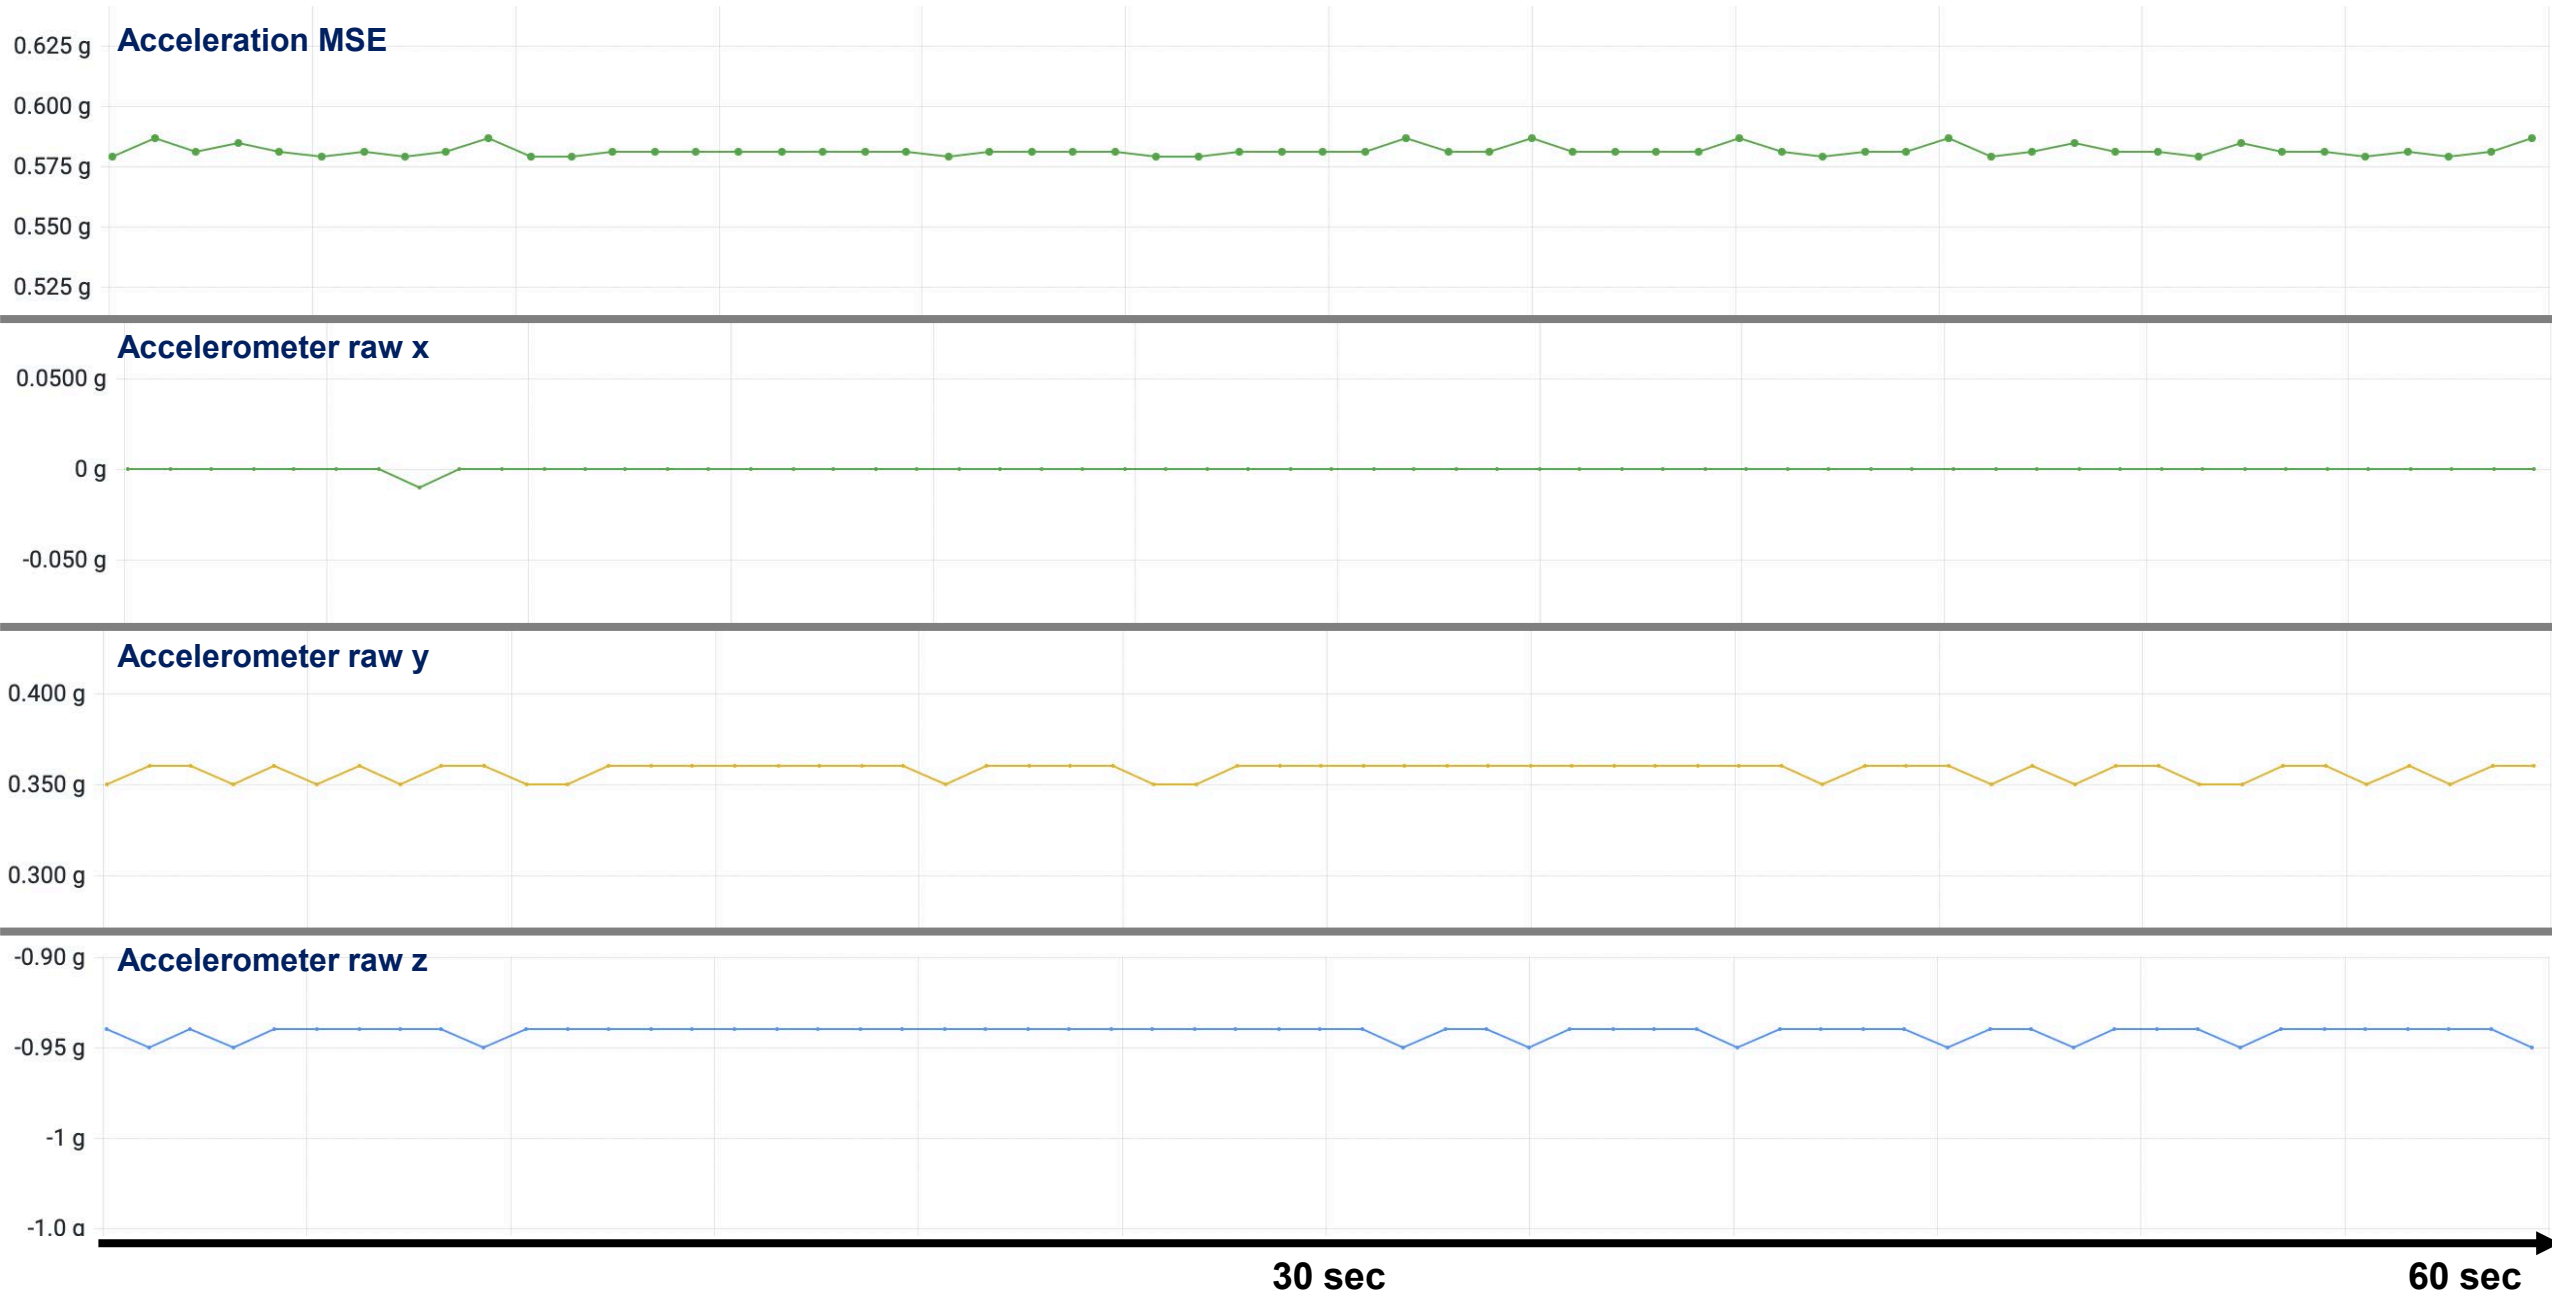

**Scene 5:** Subject lying in bed motionless, breathing shallow. Panel classification: Scene 20. Subject in bed, lying relaxed

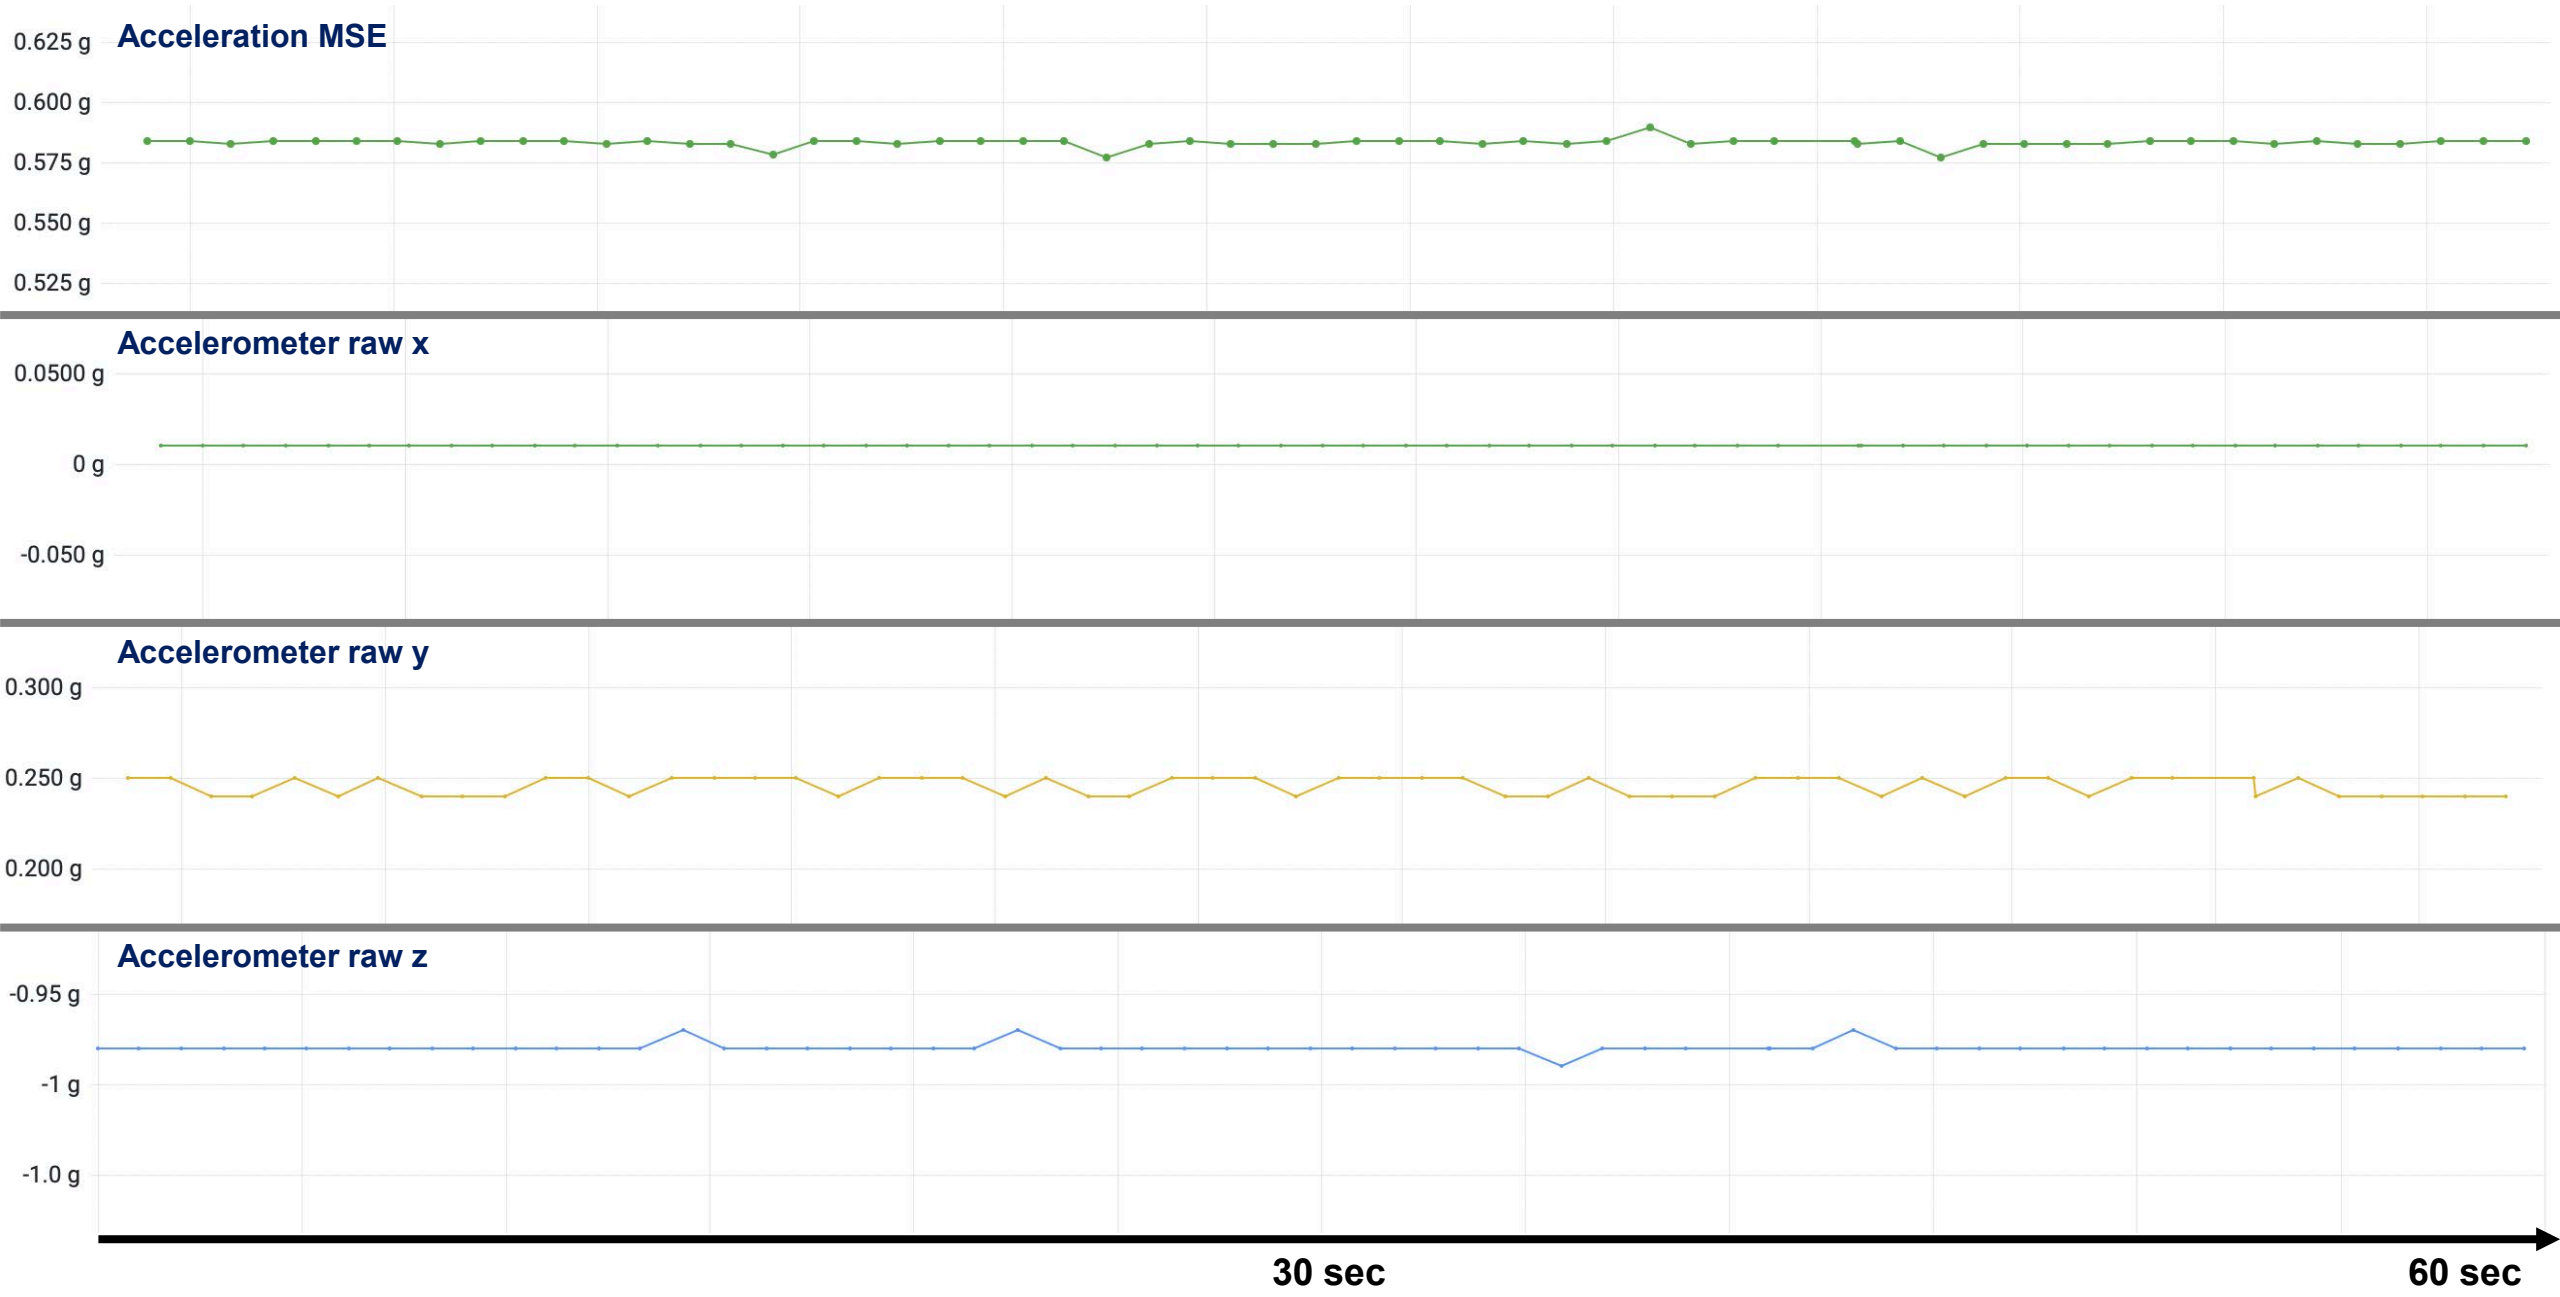

**Scene 21:** Subject lying in bed motionless, vibrating mobile phone. Panel classification: Scene 20. Subject in bed, lying relaxed

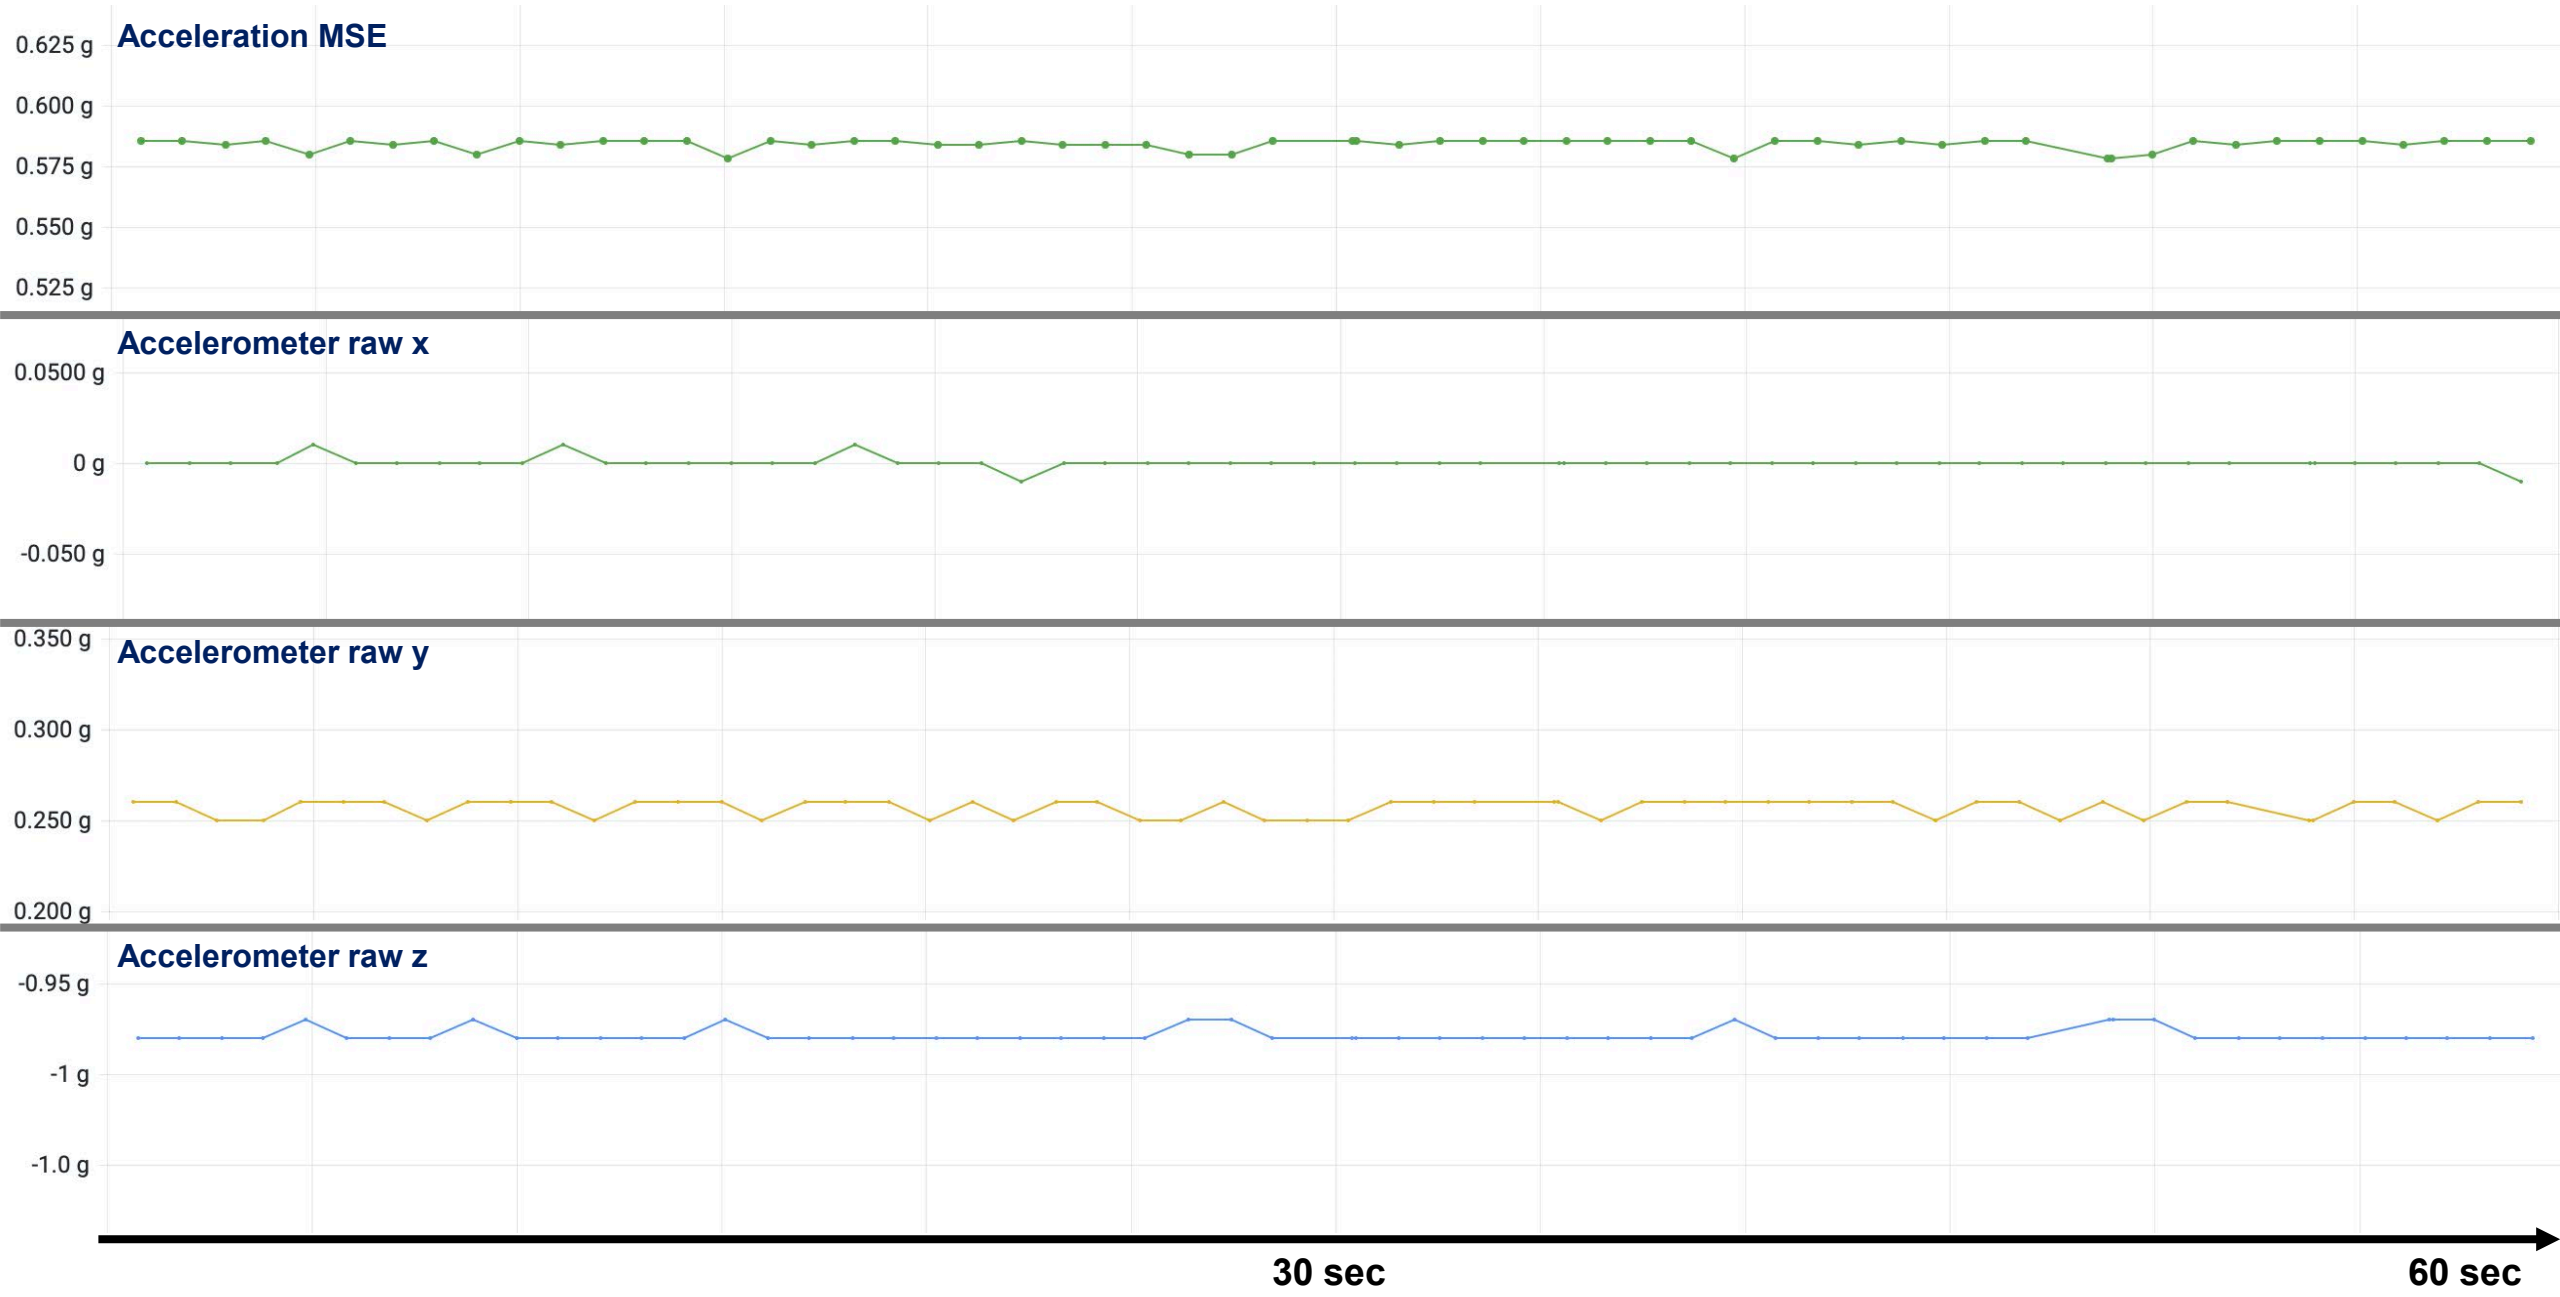

**Scene 18:** Subject in bed, exhibiting tremor. **Panel classification:** Scene 1. Bed empty

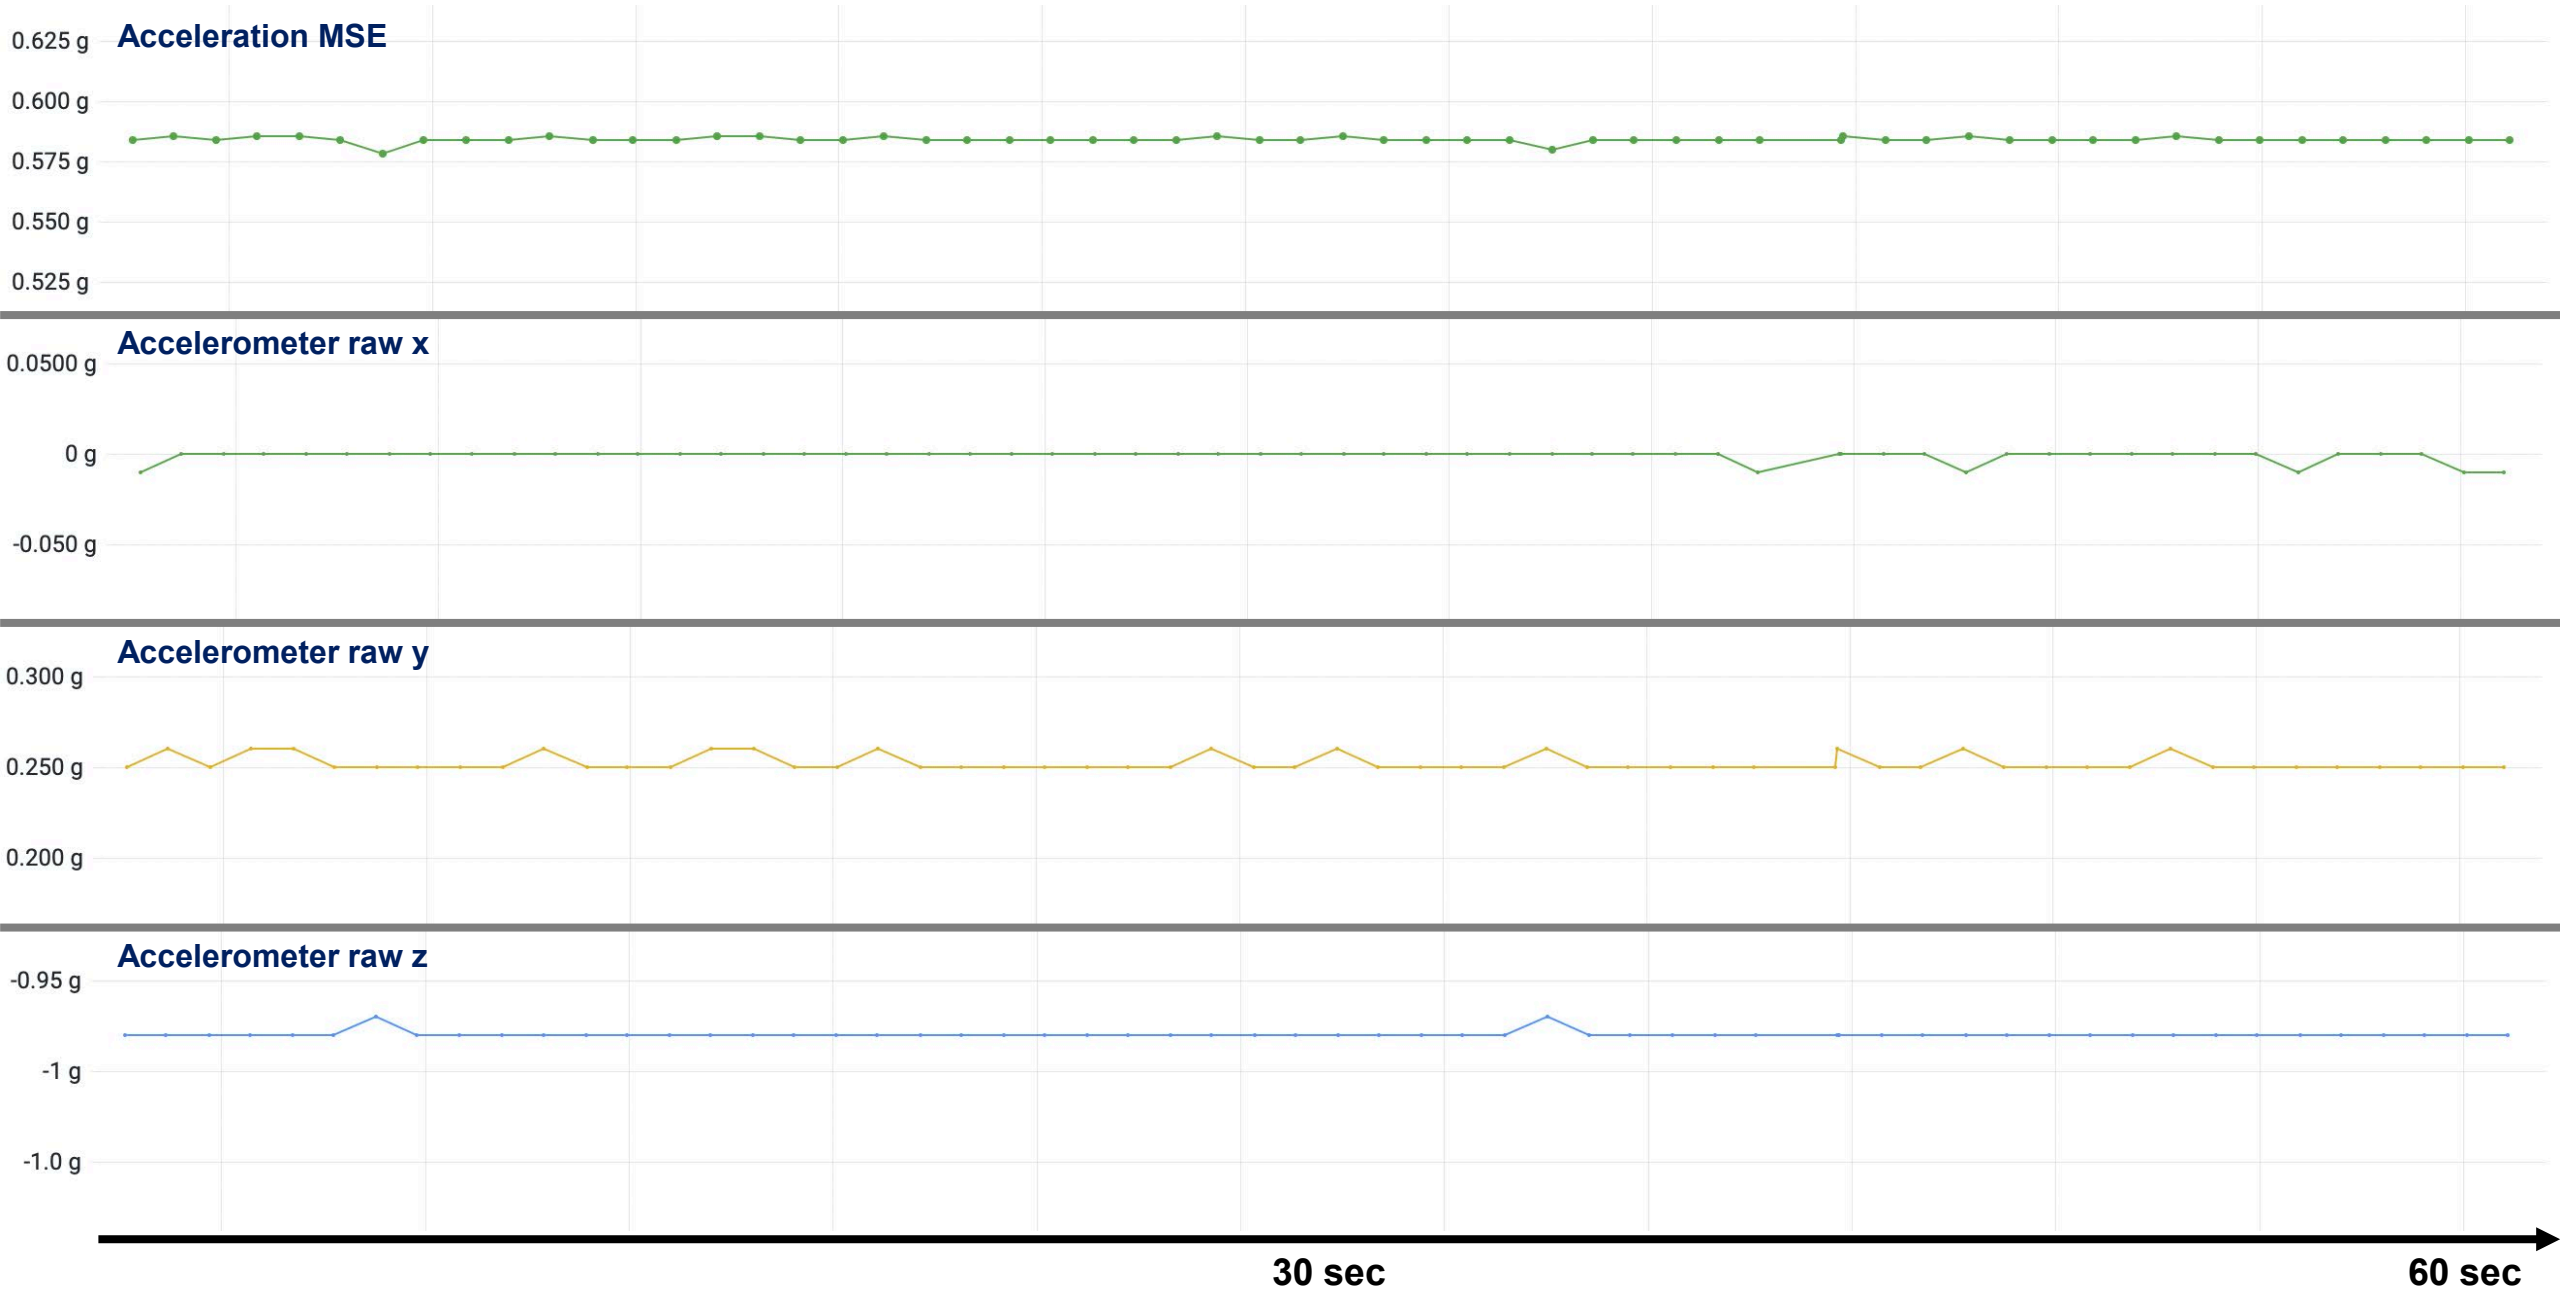



Scene 2: Subject in bed, wires being attached for standard monitoring . Panel classification: Scene 1. Bed empty

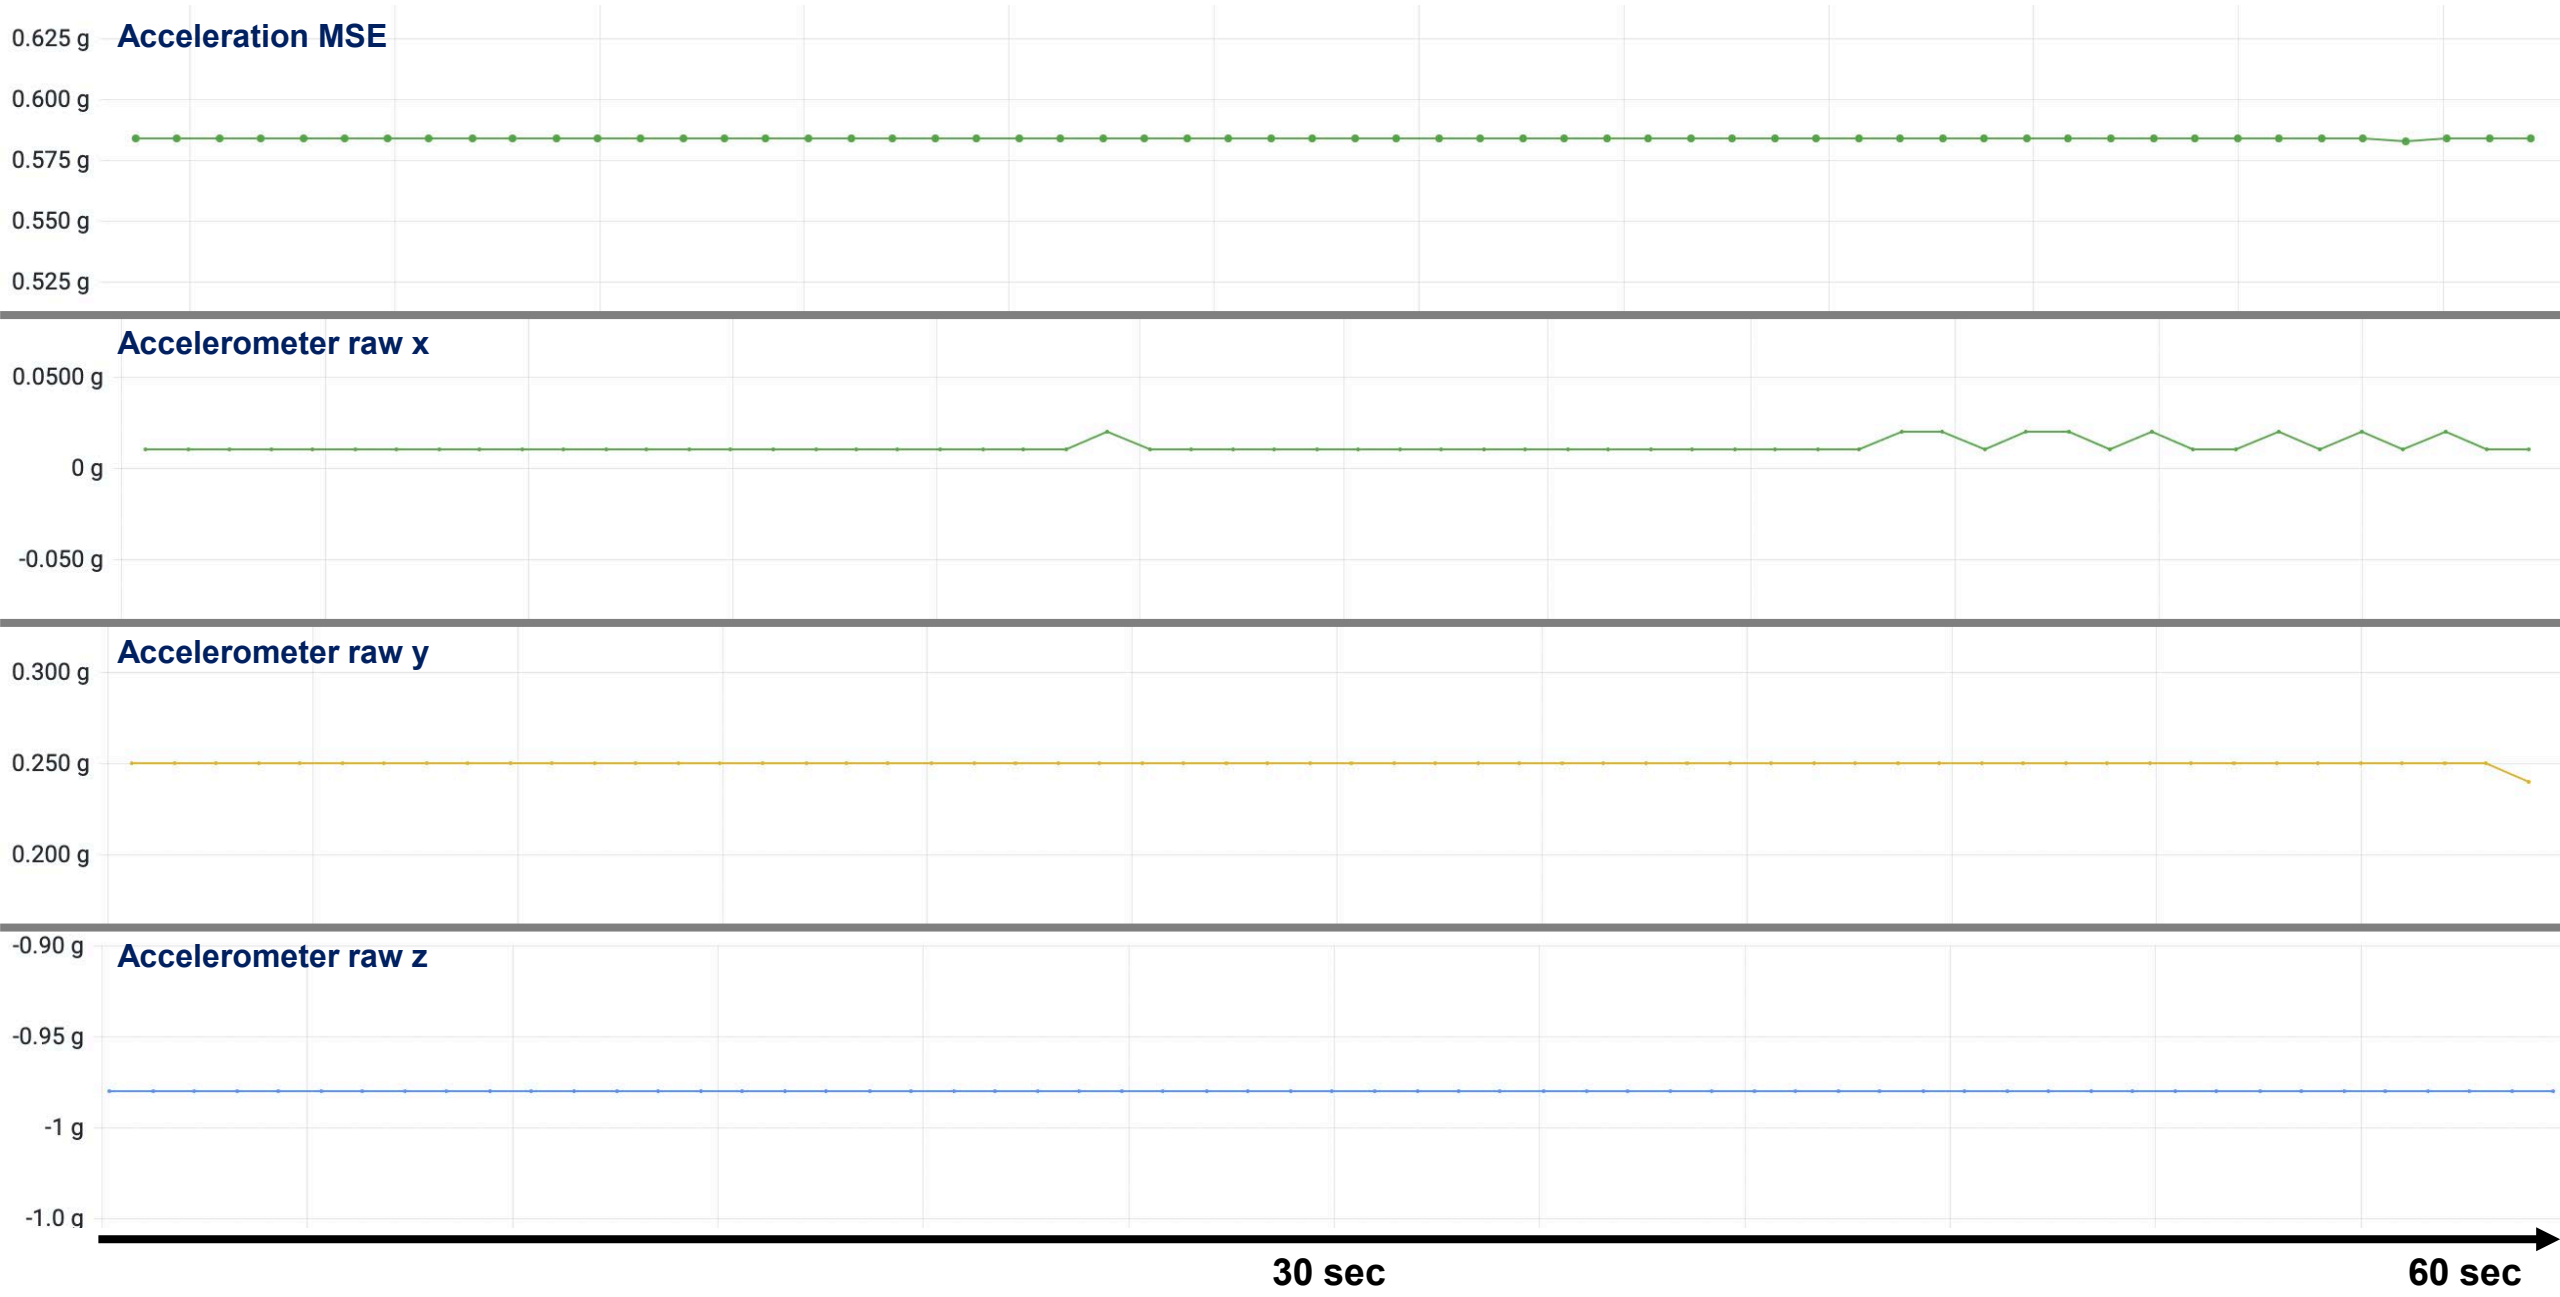

Scene 20: Subject in bed, lying relaxed. Panel classification: Scene 1. Bed empty



Supplement: s1 [file s1]
